# Supplementary material for: Trimeric and dimeric sesquiterpenoids from Artemisia atrovirens and their cytotoxicities
Source: Royal Society of Chemistry journal article supplement (doi:10.1039/d0qo01615b), 2021-01-01
Supplement: d0qo01615b1.pdf [file d0qo01615b1.pdf]

## Supporting Information

### Trimeric and Dimeric Sesquiterpenoids from *Artemisia atrovirens* and Their Cytotoxicities

Li-Hua Su,<sup>a, b</sup> Tian-Ze Li,<sup>a</sup> Chang-An Geng,<sup>a</sup> Yun-Bao Ma,<sup>a</sup> Xiao-Yan Huang,<sup>a</sup> Jin-Ping Wang,<sup>a</sup> Xue-Mei Zhang,<sup>a</sup> and Ji-Jun Chen<sup>\*, a, b</sup>

<sup>a</sup> State Key Laboratory of Phytochemistry and Plant Resources in West China, Kunming Institute of Botany, Chinese Academy of Sciences, Yunnan Key Laboratory of Natural Medicinal Chemistry, Kunming 650201, People's Republic of China

<sup>b</sup> University of Chinese Academy of Sciences, Beijing 100049, People's Republic of China

#### Corresponding Author

\* Tel: + 86 871 65223265. Fax: + 86 871 65227197. E-mail address:

chenjj@mail.kib.ac.cn

## Contents

|                                                                                         |           |
|-----------------------------------------------------------------------------------------|-----------|
| <b>1. Crystal data of compounds 1, 3, and 4.....</b>                                    | <b>1</b>  |
| <b>2. Cytotoxicity assays.....</b>                                                      | <b>7</b>  |
| 2.1 Cell lines and cell culture .....                                                   | 7         |
| 2.2 MTT assay .....                                                                     | 7         |
| <b>References .....</b>                                                                 | <b>8</b>  |
| <b>3. Computational data of compounds 1 and 2 .....</b>                                 | <b>9</b>  |
| <b>References .....</b>                                                                 | <b>9</b>  |
| <b>4. HRESIMS, IR, <math>[\alpha]_D</math>, ECD and NMR spectra of compound 1 .....</b> | <b>24</b> |
| <b>5. HRESIMS, IR, <math>[\alpha]_D</math>, ECD and NMR spectra of compound 2 .....</b> | <b>35</b> |
| <b>6. HRESIMS, IR, <math>[\alpha]_D</math>, ECD and NMR spectra of compound 3 .....</b> | <b>46</b> |
| <b>7. HRESIMS, IR, <math>[\alpha]_D</math>, ECD and NMR spectra of compound 4 .....</b> | <b>56</b> |
| <b>8. Chiral HPLC analyses of compounds 1 and 2 .....</b>                               | <b>66</b> |

## 1. Crystal data of compounds 1, 3, and 4.

The crystal data of compound **1** had been deposited in CCDC with number 2039193.

Crystal data for artematrotrimer A (**1**):  $C_{45}H_{54}O_9 \cdot CH_3OH \cdot 3(H_2O)$ ,  $M = 824.97$ ,  $a = 12.8191(8) \text{ \AA}$ ,  $b = 13.7773(9) \text{ \AA}$ ,  $c = 23.8597(14) \text{ \AA}$ ,  $\alpha = 90^\circ$ ,  $\beta = 90^\circ$ ,  $\gamma = 90^\circ$ ,  $V = 4213.9(5) \text{ \AA}^3$ ,  $T = 100.(2) \text{ K}$ , space group  $P2_12_12_1$ ,  $Z = 4$ ,  $\mu(\text{Cu K}\alpha) = 0.772 \text{ mm}^{-1}$ , 79788 reflections measured, 8329 independent reflections ( $R_{int} = 0.3014$ ). The final  $R_I$  values were 0.0749 ( $I > 2\sigma(I)$ ). The final  $wR(F^2)$  values were 0.1864 ( $I > 2\sigma(I)$ ). The final  $R_I$  values were 0.1183 (all data). The final  $wR(F^2)$  values were 0.2231 (all data). The goodness of fit on  $F^2$  was 1.030. Flack parameter = 0.2(3).

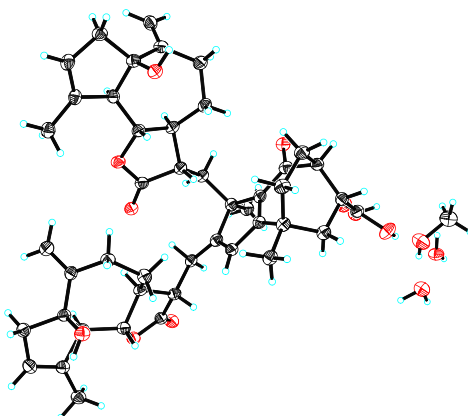

View of the molecules in an asymmetric unit.

Displacement ellipsoids are drawn at the 30% probability level.

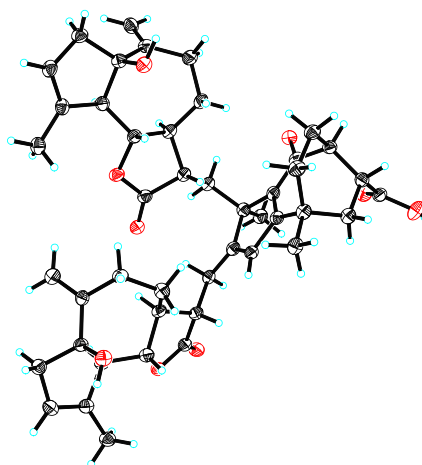

View of a molecule of compound **1** with the atom-labelling scheme.

Displacement ellipsoids are drawn at the 30% probability level.

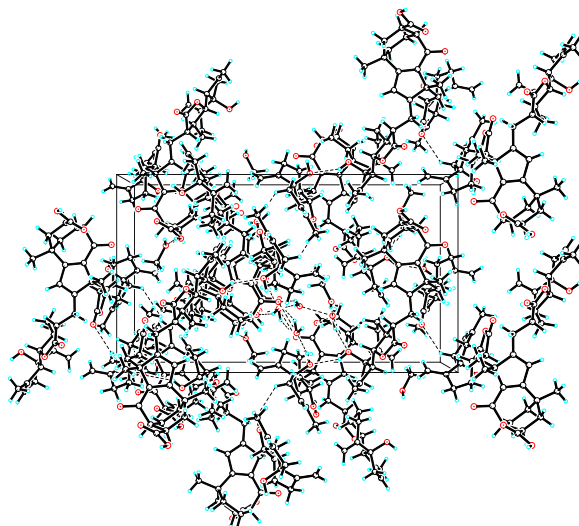

View of the pack drawing of compound **1**.

Hydrogen-bonds are shown as dashed lines.

Crystal data and structure refinement for compound **1**.

|                                 |                                                                    |                       |
|---------------------------------|--------------------------------------------------------------------|-----------------------|
| Identification code             | global                                                             |                       |
| Empirical formula               | $C_{46}H_{64}O_{13}$                                               |                       |
| Formula weight                  | 824.97                                                             |                       |
| Temperature                     | 100(2) K                                                           |                       |
| Wavelength                      | 1.54178 Å                                                          |                       |
| Crystal system                  | Orthorhombic                                                       |                       |
| Space group                     | $P2_12_12_1$                                                       |                       |
| Unit cell dimensions            | $a = 12.8191(8)$ Å                                                 | $\alpha = 90^\circ$ . |
|                                 | $b = 13.7773(9)$ Å                                                 | $\beta = 90^\circ$ .  |
|                                 | $c = 23.8597(14)$ Å                                                | $\gamma = 90^\circ$ . |
| Volume                          | $4213.9(5)$ Å <sup>3</sup>                                         |                       |
| Z                               | 4                                                                  |                       |
| Density (calculated)            | 1.300 Mg/m <sup>3</sup>                                            |                       |
| Absorption coefficient          | 0.772 mm <sup>-1</sup>                                             |                       |
| F(000)                          | 1776                                                               |                       |
| Crystal size                    | 0.200 x 0.080 x 0.060 mm <sup>3</sup>                              |                       |
| Theta range for data collection | 3.71 to 72.74°.                                                    |                       |
| Index ranges                    | $-15 \leq h \leq 15$ , $-16 \leq k \leq 17$ , $-29 \leq l \leq 28$ |                       |

|                                   |                                             |
|-----------------------------------|---------------------------------------------|
| Reflections collected             | 79788                                       |
| Independent reflections           | 8329 [R(int) = 0.3014]                      |
| Completeness to theta = 72.74°    | 99.4 %                                      |
| Absorption correction             | Semi-empirical from equivalents             |
| Max. and min. transmission        | 0.95 and 0.65                               |
| Refinement method                 | Full-matrix least-squares on F <sup>2</sup> |
| Data / restraints / parameters    | 8329 / 0 / 542                              |
| Goodness-of-fit on F <sup>2</sup> | 1.030                                       |
| Final R indices [I > 2σ(I)]       | R1 = 0.0749, wR2 = 0.1864                   |
| R indices (all data)              | R1 = 0.1183, wR2 = 0.2231                   |
| Absolute structure parameter      | 0.2(3)                                      |
| Largest diff. peak and hole       | 0.301 and -0.321 e.Å <sup>-3</sup>          |

The crystal data of compound **3** had been deposited in CCDC with number 1999131.

Crystal data for artematrodimer A (**3**): C<sub>30</sub>H<sub>36</sub>O<sub>6</sub>, *M* = 492.59, *a* = 8.9468(3) Å, *b* = 10.4309(3) Å, *c* = 27.7390(8) Å, α = 90°, β = 90°, γ = 90°, *V* = 2588.69(14) Å<sup>3</sup>, *T* = 100.(2) K, space group *P*2<sub>1</sub>2<sub>1</sub>2<sub>1</sub>, *Z* = 4, μ(Cu Kα) = 0.702 mm<sup>-1</sup>, 26058 reflections measured, 5100 independent reflections (*R*<sub>int</sub> = 0.0445). The final *R*<sub>I</sub> values were 0.0281 (*I* > 2σ(*I*)). The final *wR*(*F*<sup>2</sup>) values were 0.0699 (*I* > 2σ(*I*)). The final *R*<sub>I</sub> values were 0.0288 (all data). The final *wR*(*F*<sup>2</sup>) values were 0.0704 (all data). The goodness of fit on *F*<sup>2</sup> was 1.048. Flack parameter = 0.01(4).

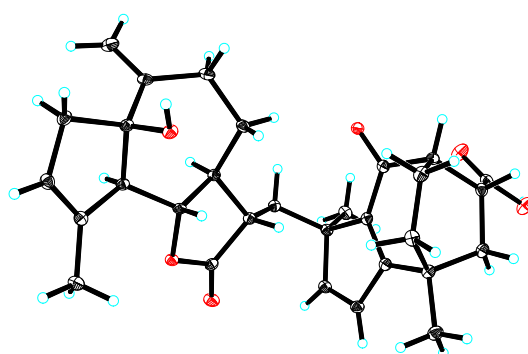

View of a molecule of compound **3** with the atom-labelling scheme.

Displacement ellipsoids are drawn at the 30% probability level.

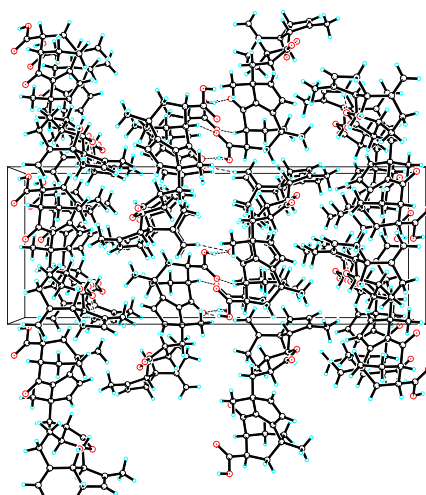

View of the pack drawing of compound **3**.

Hydrogen-bonds are shown as dashed lines.

Crystal data and structure refinement for compound **3**.

|                                       |                                                                   |                       |
|---------------------------------------|-------------------------------------------------------------------|-----------------------|
| Identification code                   | global                                                            |                       |
| Empirical formula                     | $C_{30}H_{36}O_6$                                                 |                       |
| Formula weight                        | 492.59                                                            |                       |
| Temperature                           | 100(2) K                                                          |                       |
| Wavelength                            | 1.54178 Å                                                         |                       |
| Crystal system                        | Orthorhombic                                                      |                       |
| Space group                           | $P2_12_12_1$                                                      |                       |
| Unit cell dimensions                  | $a = 8.9468(3)$ Å                                                 | $\alpha = 90^\circ$ . |
|                                       | $b = 10.4309(3)$ Å                                                | $\beta = 90^\circ$ .  |
|                                       | $c = 27.7390(8)$ Å                                                | $\gamma = 90^\circ$ . |
| Volume                                | $2588.69(14)$ Å <sup>3</sup>                                      |                       |
| Z                                     | 4                                                                 |                       |
| Density (calculated)                  | $1.264$ Mg/m <sup>3</sup>                                         |                       |
| Absorption coefficient                | $0.702$ mm <sup>-1</sup>                                          |                       |
| F(000)                                | 1056                                                              |                       |
| Crystal size                          | $0.330 \times 0.330 \times 0.090$ mm <sup>3</sup>                 |                       |
| Theta range for data collection       | $3.19$ to $72.39^\circ$ .                                         |                       |
| Index ranges                          | $-9 \leq h \leq 11$ , $-12 \leq k \leq 12$ , $-34 \leq l \leq 33$ |                       |
| Reflections collected                 | 26058                                                             |                       |
| Independent reflections               | 5100 [R(int) = 0.0445]                                            |                       |
| Completeness to theta = $72.39^\circ$ | 100.0 %                                                           |                       |
| Absorption correction                 | Semi-empirical from equivalents                                   |                       |

|                                      |                                              |
|--------------------------------------|----------------------------------------------|
| Max. and min. transmission           | 0.94 and 0.76                                |
| Refinement method                    | Full-matrix least-squares on $F^2$           |
| Data / restraints / parameters       | 5100 / 0 / 332                               |
| Goodness-of-fit on $F^2$             | 1.048                                        |
| Final R indices [ $I > 2\sigma(I)$ ] | $R_1 = 0.0281$ , $wR_2 = 0.0699$             |
| R indices (all data)                 | $R_1 = 0.0288$ , $wR_2 = 0.0704$             |
| Absolute structure parameter         | 0.01(4)                                      |
| Largest diff. peak and hole          | 0.185 and $-0.211 \text{ e.}\text{\AA}^{-3}$ |

The crystal data of compound **4** had been deposited in CCDC with number 2016459.

Crystal data for artematrodimer B (**4**):  $\text{C}_{30}\text{H}_{36}\text{O}_6 \cdot \text{C}_2\text{H}_6\text{O} \cdot \text{H}_2\text{O}$ ,  $M = 556.67$ ,  $a = 6.81670(10) \text{ \AA}$ ,  $b = 11.7590(2) \text{ \AA}$ ,  $c = 18.1156(4) \text{ \AA}$ ,  $\alpha = 90^\circ$ ,  $\beta = 96.5470(10)^\circ$ ,  $\gamma = 90^\circ$ ,  $V = 1442.63(5) \text{ \AA}^3$ ,  $T = 101.(2) \text{ K}$ , space group  $P1211$ ,  $Z = 2$ ,  $\mu(\text{Cu K}\alpha) = 0.740 \text{ mm}^{-1}$ , 23251 reflections measured, 5682 independent reflections ( $R_{int} = 0.0460$ ). The final  $R_I$  values were 0.0315 ( $I > 2\sigma(I)$ ). The final  $wR(F^2)$  values were 0.0745 ( $I > 2\sigma(I)$ ). The final  $R_I$  values were 0.0337 (all data). The final  $wR(F^2)$  values were 0.0763 (all data). The goodness of fit on  $F^2$  was 1.058. Flack parameter = 0.11(7).

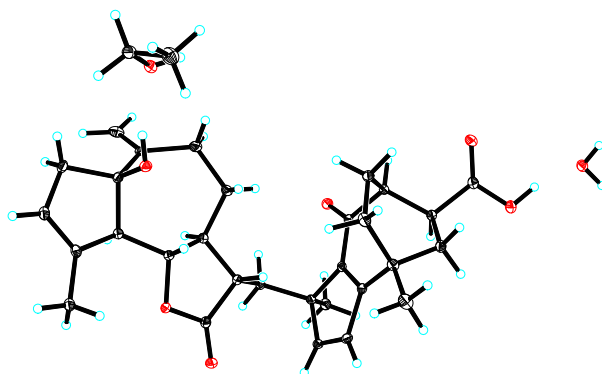

View of the molecules in an asymmetric unit.

Displacement ellipsoids are drawn at the 30% probability level.

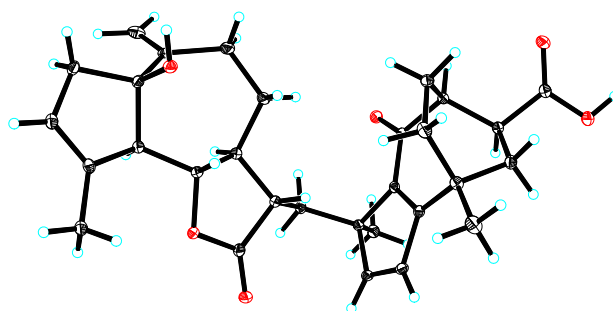

View of a molecule of compound **4** with the atom-labelling scheme.

Displacement ellipsoids are drawn at the 30% probability level.

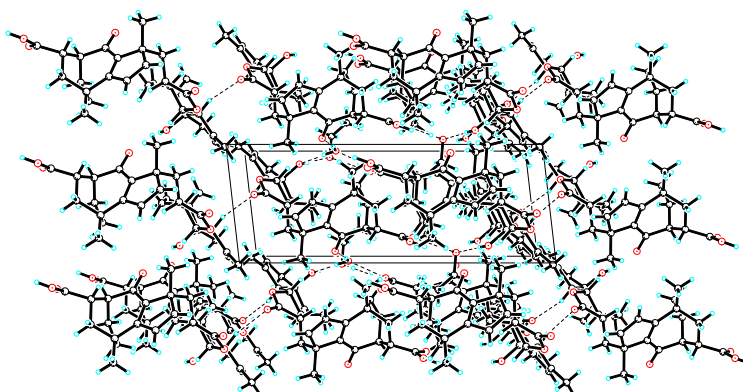

View of the pack drawing of compound **4**.

Hydrogen-bonds are shown as dashed lines.

Crystal data and structure refinement for compound **4**.

|                      |                             |                               |
|----------------------|-----------------------------|-------------------------------|
| Identification code  | global                      |                               |
| Empirical formula    | $C_{32}H_{44}O_8$           |                               |
| Formula weight       | 556.67                      |                               |
| Temperature          | 101(2) K                    |                               |
| Wavelength           | 1.54178 Å                   |                               |
| Crystal system       | Monoclinic                  |                               |
| Space group          | P1211                       |                               |
| Unit cell dimensions | $a = 6.81670(10)$ Å         | $\alpha = 90^\circ$ .         |
|                      | $b = 11.7590(2)$ Å          | $\beta = 96.5470(10)^\circ$ . |
|                      | $c = 18.1156(4)$ Å          | $\gamma = 90^\circ$ .         |
| Volume               | $1442.63(5)$ Å <sup>3</sup> |                               |
| Z                    | 2                           |                               |
| Density (calculated) | 1.282 Mg/m <sup>3</sup>     |                               |



|                                   |                                             |
|-----------------------------------|---------------------------------------------|
| Absorption coefficient            | 0.740 mm <sup>-1</sup>                      |
| F(000)                            | 600                                         |
| Crystal size                      | 0.450 x 0.060 x 0.040 mm <sup>3</sup>       |
| Theta range for data collection   | 2.46 to 72.38°.                             |
| Index ranges                      | -8<=h<=6, -14<=k<=14, -22<=l<=22            |
| Reflections collected             | 23251                                       |
| Independent reflections           | 5682 [R(int) = 0.0460]                      |
| Completeness to theta = 72.38°    | 99.9 %                                      |
| Absorption correction             | Semi-empirical from equivalents             |
| Max. and min. transmission        | 0.97 and 0.88                               |
| Refinement method                 | Full-matrix least-squares on F <sup>2</sup> |
| Data / restraints / parameters    | 5682 / 1 / 371                              |
| Goodness-of-fit on F <sup>2</sup> | 1.058                                       |
| Final R indices [I>2sigma(I)]     | R1 = 0.0315, wR2 = 0.0745                   |
| R indices (all data)              | R1 = 0.0337, wR2 = 0.0763                   |
| Absolute structure parameter      | 0.11(7)                                     |
| Largest diff. peak and hole       | 0.216 and -0.189 e.Å <sup>-3</sup>          |

## 2. Cytotoxicity assays

### 2.1 Cell lines and cell culture

Human hepatocellular carcinoma HepG2 cells were obtained as a gift from Service Center for Bioactivity Screening (Kunming Institute of Botany, Chinese Academy of Sciences, Kunming, China). Huh7 cell line was purchased from the Shanghai Jining Biotechnology Co., Ltd. (Shanghai, China) and maintained at 37 °C with 5% CO<sub>2</sub> at a humidified atmosphere. Both two cell lines were cultured in Dulbecco's modified Eagle medium (DMEM) (Gibco, Thermo Fisher Scientific Co., Ltd., Suzhou, China) supplemented with 10% fetal bovine serum (FBS) (Gibco, Life Technologies, NY, USA) and maintained at 37 °C with 5% CO<sub>2</sub> at a humidified atmosphere. Sorafenib (purity > 99%, Aladdin Biotechnology Co., Ltd., Shanghai, China) was used as a positive control.

### 2.2 MTT assay

The cytotoxicity of the compounds **1–4** were assessed by MTT method.<sup>1–3</sup> Briefly, cells in a density of 3×10<sup>4</sup> cells/well were seeded into 96-well plates and grown for 24

h and were treated with increasing concentrations of compounds and incubated for another 48 h. At the end of exposure time and removal of all the remaining liquid in the wells, 100  $\mu$ L of MTT reagent (1mg/mL) was added into each well and the plates were kept in the incubator for 4 h at 37  $^{\circ}$ C in the dark. After the formazan crystals were dissolved with dimethyl sulfoxide, then measured at 490 nm using microplate reader (BIO-RAD, USA). The inhibitory ratio was calculated as  $(1 - A_{490} \text{ treated} / A_{490} \text{ control}) \times 100\%$ . The cytotoxicity of **1–4** was expressed as  $IC_{50}$  values, determined by GraphPad Prism 5 (GraphPad Software, CA, USA). The results are as follows:

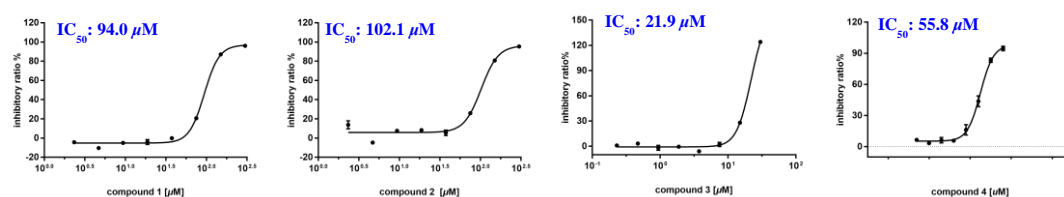

Figure S1.  $IC_{50}$  curve of compounds **1–4** inhibit HepG2 proliferation, sorafenib was used as positive control.  $IC_{50}$ : 12.8  $\mu$ M.

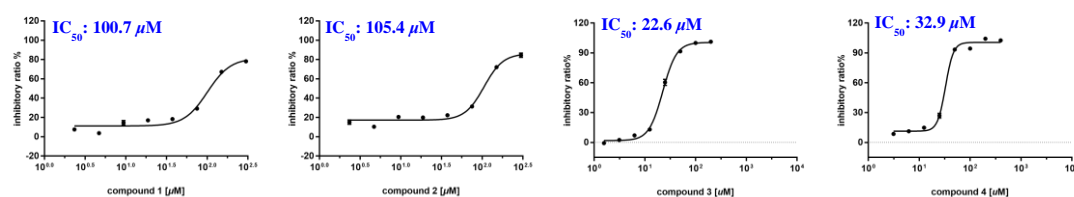

Figure S2.  $IC_{50}$  curve of compounds **1–4** inhibit Huh7 proliferation, sorafenib was used as positive control.  $IC_{50}$ : 11.2  $\mu$ M.

## References

- (1) L. H. Su, C. A. Geng, T. Z. Li, Y. B. Ma, X. Y. Huang, X. M. Zhang, J. J. Chen, *J. Org. Chem.*, 2020, **85**, 13466–13471.
- (2) L. H. Su, X. T. Zhang, Y. B. Ma, C. A. Geng, X. Y. Huang, J. Hu, T. Z. Li, S. Tang, C. Shen, Z. Gao, X. M. Zhang, J. J. Chen, *Acta Pharm. Sin. B*, 2020, doi.org/10.1016/j.apsb.2020.12.006.
- (3) S. Tang, X. T. Zhang, Y. B. Ma, X. Y. Huang, C. A. Geng, T. Z. Li, X. M. Zhang, C. Shen, L. H. Su, Z. Gao, J. J. Chen, *J. Nat. Prod.*, 2020, **83**, 2618–2630.

### 3. Computational data of compounds 1 and 2

The ECD calculations for compounds **1** and **2** were performed using the Gaussian 09 program. The 3D structure of **1** was yielded from the X-ray crystallographic data and optimized by the DFT calculation at the b3lyp/6-31G(d,p) level in the gas phase. Conformers of **2** were obtained by MMFF94s force field, and the appropriate low-energy conformers were selected and optimized using the DFT calculation at b3lyp/6-31G(d,p) level in the gas phase. In order to exclude imaginary frequencies, frequency calculations were performed at the same level. ECD calculations were performed by means of the TDDFT methodology at b3lyp/6-311+g(d,p) level with the consideration of solvent effects. The overall calculated ECD curves were generated by Boltzmann weighting of all the conformers calculated using SpecDis 1.62 with  $\sigma = \sim 0.3$  eV.<sup>4-5</sup>

### References

- (4) M. J. Frisch, G. W. Trucks, H. B. Schlegel, G. E. Scuseria, M. A. Robb, J. R. Cheeseman, G. Scalmani, V. Barone, B. Mennucci, G. A. Petersson, H. Nakatsuji, M. Caricato, X. Li, H. P. Hratchian, A. F. Izmaylov, J. Bloino, G. Zheng, J. L. Sonnenberg, M. Hada, M. Ehara, K. Toyota, R. Fukuda, J. Hasegawa, M. Ishida, T. Nakajima, Y. Honda, O. Kitao, H. Nakai, T. Vreven, J. A. Montgomery, Jr. J. E. Peralta, F. Ogliaro, M. Bearpark, J. J. Heyd, E. Brothers, K. N. Kudin, V. N. Staroverov, T. Keith, R. Kobayashi, J. Normand, K. Raghavachari, A. Rendell, J.C. Burant, S. S. Iyengar, J. Tomasi, M. Cossi, N. Rega, J. M. Millam, M. Klene, J. E. Knox, J. B. Cross, V. Bakken, C. Adamo, J. Jaramillo, R. Gomperts, R. E. Stratmann, O. Yazyev, A. J. Austin, R. Cammi, C. Pomelli, J. W. Ochterski, R. L. Martin, K. Morokuma, V. G. Zakrzewski, G. A. Voth, P. Salvador, J. J. Dannenberg, S. Dapprich, A. D. Daniels, O. Farkas, J. B. Foresman, J. V. Ortiz, J. Cioslowski, D. J. Fox, **Gaussian 09**, Revision C.01; Gaussian, Inc., Wallingford CT: 2010.
- (5) P. H. Willoughby, M. J. Jansma, T. R. Hoye, *Nat. Protoc.* 2014, **9**, 643–660.

**Cartesian coordinates of the lowest-energy formers optimized at the b3lyp/6-311+g(d,p) level**

Standard orientation of **1**

| Center Number | Atomic Number | Atomic Type | Coordinates (Angstroms) |           |           |
|---------------|---------------|-------------|-------------------------|-----------|-----------|
|               |               |             | X                       | Y         | Z         |
| 1             | 8             | 0           | -4.844312               | -2.291823 | -1.225423 |
| 2             | 8             | 0           | -3.561030               | -3.381328 | -2.730337 |
| 3             | 8             | 0           | 4.219924                | -4.826386 | -1.005859 |
| 4             | 8             | 0           | 4.528616                | -6.203457 | 0.751197  |
| 5             | 1             | 0           | 4.606217                | -6.787046 | 0.151375  |
| 6             | 8             | 0           | 4.306590                | -1.638270 | -1.530053 |
| 7             | 8             | 0           | -0.160901               | 2.735879  | -0.549116 |
| 8             | 8             | 0           | 3.144883                | 4.209941  | 1.473205  |
| 9             | 1             | 0           | 3.998938                | 4.381872  | 1.758923  |
| 10            | 6             | 0           | -7.751485               | 0.359287  | 0.685993  |
| 11            | 1             | 0           | -8.824392               | 0.369708  | 0.927838  |
| 12            | 8             | 0           | -5.284811               | 0.132773  | 2.326920  |
| 13            | 1             | 0           | -6.039303               | -0.120821 | 2.596773  |
| 14            | 6             | 0           | -7.090882               | -0.654997 | 0.147438  |
| 15            | 6             | 0           | -5.620655               | -0.330080 | -0.064574 |
| 16            | 1             | 0           | -5.549687               | 0.127336  | -0.951330 |
| 17            | 6             | 0           | -4.602572               | -1.448645 | -0.072597 |
| 18            | 1             | 0           | -4.697489               | -1.989109 | 0.763568  |
| 19            | 6             | 0           | -3.148176               | -0.986162 | -0.222248 |
| 20            | 1             | 0           | -3.133110               | -0.246158 | -0.895955 |
| 21            | 6             | 0           | -4.144185               | 2.637382  | -0.048774 |
| 22            | 1             | 0           | -3.209820               | 3.184375  | -0.242766 |
| 23            | 1             | 0           | -5.078304               | 3.000488  | -0.502309 |
| 24            | 6             | 0           | -2.525276               | -2.227596 | -0.882722 |
| 25            | 1             | 0           | -2.359202               | -2.911632 | -0.172272 |
| 26            | 8             | 0           | -1.165689               | 0.977836  | -1.551196 |
| 27            | 6             | 0           | -1.241940               | -2.056621 | -1.700443 |
| 28            | 1             | 0           | -1.193714               | -2.793053 | -2.360517 |
| 29            | 1             | 0           | -1.304530               | -1.209397 | -2.205119 |
| 30            | 1             | 0           | -0.675973               | -2.745028 | 1.023370  |
| 31            | 1             | 0           | 5.078751                | 4.722927  | -2.573652 |
| 32            | 6             | 0           | 0.056751                | -2.054943 | -0.904568 |
| 33            | 6             | 0           | 1.367863                | -1.709923 | -1.543695 |
| 34            | 6             | 0           | 1.435136                | -0.236810 | -1.989471 |
| 35            | 1             | 0           | 2.337240                | -0.065028 | -2.359714 |
| 36            | 1             | 0           | 0.784346                | -0.105845 | -2.724130 |
| 37            | 6             | 0           | 1.152377                | 0.811260  | -0.903669 |
| 38            | 1             | 0           | 1.192797                | 0.361308  | -0.011348 |
| 39            | 1             | 0           | 3.951789                | 6.124160  | -1.974400 |
| 40            | 1             | 0           | 0.936734                | 7.523695  | 1.199729  |
| 41            | 6             | 0           | 2.070865                | 2.047777  | -0.869114 |
| 42            | 1             | 0           | 2.176759                | 2.395955  | -1.800827 |
| 43            | 6             | 0           | 1.194667                | 3.022548  | -0.073472 |
| 44            | 1             | 0           | 1.260000                | 2.810685  | 0.900987  |
| 45            | 6             | 0           | 1.495441                | 4.483226  | -0.292573 |
| 46            | 1             | 0           | 1.470262                | 4.645243  | -1.279031 |
| 47            | 6             | 0           | 2.923020                | 4.846809  | 0.194888  |
| 48            | 6             | 0           | 2.830357                | 6.363217  | 0.442618  |
| 49            | 1             | 0           | 3.399027                | 6.638204  | 1.205068  |
| 50            | 1             | 0           | 3.098764                | 6.874493  | -0.362097 |

|     |   |   |           |           |           |
|-----|---|---|-----------|-----------|-----------|
| 51  | 6 | 0 | -6.757606 | 1.487416  | 0.983265  |
| 52  | 1 | 0 | -6.969034 | 1.899962  | 1.858928  |
| 53  | 1 | 0 | -6.773144 | 2.185736  | 0.281544  |
| 54  | 6 | 0 | 4.345611  | 5.105019  | -1.847943 |
| 55  | 6 | 0 | -5.423445 | 0.763948  | 1.017838  |
| 56  | 6 | 0 | -4.145333 | 1.547995  | 0.726235  |
| 57  | 6 | 0 | -2.863027 | 1.007266  | 1.380184  |
| 58  | 1 | 0 | -2.904458 | 1.106886  | 2.364125  |
| 59  | 1 | 0 | -2.116593 | 1.571471  | 1.059397  |
| 60  | 6 | 0 | -2.521461 | -0.451635 | 1.066714  |
| 61  | 1 | 0 | -1.536834 | -0.538979 | 1.000237  |
| 62  | 1 | 0 | -2.820753 | -1.017542 | 1.822007  |
| 63  | 6 | 0 | -3.691190 | -2.720352 | -1.727729 |
| 64  | 6 | 0 | 2.250813  | -2.024152 | -0.393406 |
| 65  | 6 | 0 | 1.585647  | -2.333753 | 0.713852  |
| 66  | 6 | 0 | 0.144869  | -2.420692 | 0.366788  |
| 67  | 6 | 0 | 2.172502  | -2.668725 | 2.082526  |
| 68  | 6 | 0 | 1.031818  | -2.817833 | 3.106524  |
| 69  | 1 | 0 | 1.408210  | -3.022434 | 3.986940  |
| 70  | 1 | 0 | 0.436269  | -3.543613 | 2.827416  |
| 71  | 1 | 0 | 0.525346  | -1.980055 | 3.154443  |
| 72  | 6 | 0 | 3.136887  | -1.580299 | 2.560080  |
| 73  | 1 | 0 | 3.330240  | -1.734054 | 3.519720  |
| 74  | 1 | 0 | 2.681457  | -0.704734 | 2.486661  |
| 75  | 6 | 0 | 4.487095  | -1.495169 | 1.798215  |
| 76  | 1 | 0 | 4.591108  | -0.582053 | 1.429666  |
| 77  | 1 | 0 | 5.227634  | -1.650423 | 2.435914  |
| 78  | 6 | 0 | 4.589816  | -2.516792 | 0.649680  |
| 79  | 1 | 0 | 5.545020  | -2.539516 | 0.351817  |
| 80  | 6 | 0 | 4.247682  | -3.915308 | 1.227942  |
| 81  | 1 | 0 | 4.957362  | -4.119003 | 1.901182  |
| 82  | 6 | 0 | 2.912093  | -4.019095 | 1.971471  |
| 83  | 1 | 0 | 3.078505  | -4.369911 | 2.882343  |
| 84  | 1 | 0 | 2.329972  | -4.666186 | 1.500674  |
| 85  | 6 | 0 | 4.319550  | -5.023581 | 0.181808  |
| 86  | 6 | 0 | 3.750253  | -2.022988 | -0.529225 |
| 87  | 6 | 0 | -0.205604 | 1.493863  | -1.030202 |
| 88  | 6 | 0 | 0.640289  | 5.560669  | 0.356651  |
| 89  | 6 | 0 | -0.871679 | 5.469513  | 0.383990  |
| 90  | 1 | 0 | -1.225278 | 6.281765  | 0.801341  |
| 91  | 1 | 0 | -1.154448 | 4.686157  | 0.900385  |
| 92  | 1 | 0 | -1.211750 | 5.397231  | -0.532266 |
| 93  | 6 | 0 | 1.349918  | 6.606551  | 0.754816  |
| 94  | 6 | 0 | 3.940143  | 4.341646  | -0.827891 |
| 95  | 6 | 0 | 4.479002  | 2.915515  | -0.633732 |
| 96  | 1 | 0 | 5.175531  | 2.922911  | 0.070506  |
| 97  | 1 | 0 | 4.920379  | 2.652556  | -1.479370 |
| 98  | 6 | 0 | 3.450225  | 1.821930  | -0.272618 |
| 99  | 1 | 0 | 3.793277  | 0.946494  | -0.586967 |
| 100 | 1 | 0 | 3.367726  | 1.775009  | 0.711690  |
| 101 | 6 | 0 | 1.611071  | -2.602425 | -2.774218 |
| 102 | 1 | 0 | 2.517453  | -2.449679 | -3.113993 |
| 103 | 1 | 0 | 0.957718  | -2.381148 | -3.470507 |
| 104 | 1 | 0 | 1.511239  | -3.543864 | -2.519623 |
| 105 | 6 | 0 | -7.683416 | -1.986258 | -0.260039 |
| 106 | 1 | 0 | -8.651291 | -1.965454 | -0.111357 |
| 107 | 1 | 0 | -7.284977 | -2.699576 | 0.280751  |

|                             |   |           |           |           |           |
|-----------------------------|---|-----------|-----------|-----------|-----------|
| 108                         | 1 | 0         | -7.501099 | -2.154635 | -1.208025 |
| -----                       |   |           |           |           |           |
| Rotational constants (GHZ): |   | 0.0582425 | 0.0436304 | 0.0287913 |           |

Standard orientation of **2**

| Center<br>Number | Atomic<br>Number | Atomic<br>Type | Coordinates (Angstroms) |           |           |
|------------------|------------------|----------------|-------------------------|-----------|-----------|
|                  |                  |                | X                       | Y         | Z         |
| -----            |                  |                |                         |           |           |
| 1                | 8                | 0              | 5.183300                | -1.730231 | 1.532984  |
| 2                | 8                | 0              | 3.891697                | -2.835159 | 3.004353  |
| 3                | 8                | 0              | -5.857272               | -5.212816 | -1.027826 |
| 4                | 8                | 0              | -4.351730               | -6.783645 | -0.620883 |
| 5                | 1                | 0              | -3.472345               | -6.961228 | -0.306101 |
| 6                | 8                | 0              | -4.034653               | -1.637296 | 1.630226  |
| 7                | 8                | 0              | -0.361681               | 2.923909  | 0.044198  |
| 8                | 8                | 0              | -4.084442               | 4.033403  | -1.249466 |
| 9                | 1                | 0              | -4.936286               | 4.286991  | -1.589332 |
| 10               | 6                | 0              | 8.153911                | 0.657650  | -0.578508 |
| 11               | 1                | 0              | 9.221034                | 0.703886  | -0.684433 |
| 12               | 8                | 0              | 5.779867                | -0.046184 | -2.255869 |
| 13               | 1                | 0              | 6.601471                | -0.507840 | -2.392581 |
| 14               | 6                | 0              | 7.507382                | -0.195332 | 0.211058  |
| 15               | 6                | 0              | 6.009503                | 0.105960  | 0.173821  |
| 16               | 1                | 0              | 5.777087                | 0.774607  | 0.999619  |
| 17               | 6                | 0              | 5.035306                | -1.049355 | 0.245483  |
| 18               | 1                | 0              | 5.243742                | -1.783653 | -0.519379 |
| 19               | 6                | 0              | 3.545413                | -0.649947 | 0.226867  |
| 20               | 1                | 0              | 3.415238                | 0.247822  | 0.822439  |
| 21               | 6                | 0              | 4.520568                | 2.968399  | -0.796639 |
| 22               | 1                | 0              | 3.586458                | 3.497349  | -0.787069 |
| 23               | 1                | 0              | 5.370260                | 3.514461  | -0.435838 |
| 24               | 6                | 0              | 2.898547                | -1.821701 | 1.002642  |
| 25               | 1                | 0              | 2.784940                | -2.678478 | 0.340090  |
| 26               | 8                | 0              | 1.061470                | 1.393527  | 0.846512  |
| 27               | 6                | 0              | 1.583474                | -1.551417 | 1.748723  |
| 28               | 1                | 0              | 1.575677                | -2.190161 | 2.627404  |
| 29               | 1                | 0              | 1.587567                | -0.529826 | 2.102579  |
| 30               | 1                | 0              | 0.922685                | -2.705182 | -0.858757 |
| 31               | 1                | 0              | -5.352548               | 4.384474  | 3.027380  |
| 32               | 6                | 0              | 0.309975                | -1.813657 | 0.997481  |
| 33               | 6                | 0              | -1.058603               | -1.554684 | 1.632913  |
| 34               | 6                | 0              | -1.337490               | -0.050390 | 1.939353  |
| 35               | 1                | 0              | -2.307910               | -0.017350 | 2.414918  |
| 36               | 1                | 0              | -0.611753               | 0.287713  | 2.671084  |
| 37               | 6                | 0              | -1.349380               | 0.920328  | 0.747003  |
| 38               | 1                | 0              | -1.504852               | 0.369239  | -0.179303 |
| 39               | 1                | 0              | -4.616330               | 5.885793  | 2.320121  |
| 40               | 1                | 0              | -2.355378               | 7.473008  | -1.523020 |
| 41               | 6                | 0              | -2.396710               | 2.059246  | 0.817649  |
| 42               | 1                | 0              | -2.346818               | 2.481558  | 1.820866  |
| 43               | 6                | 0              | -1.805894               | 3.087468  | -0.163618 |
| 44               | 1                | 0              | -2.013944               | 2.818043  | -1.187039 |
| 45               | 6                | 0              | -2.190282               | 4.523991  | 0.110017  |
| 46               | 1                | 0              | -1.911972               | 4.739122  | 1.139822  |
| 47               | 6                | 0              | -3.723882               | 4.735814  | -0.034141 |
| 48               | 6                | 0              | -3.843857               | 6.250886  | -0.318047 |

|     |   |   |           |           |           |
|-----|---|---|-----------|-----------|-----------|
| 49  | 1 | 0 | -4.705499 | 6.455779  | -0.946624 |
| 50  | 1 | 0 | -3.972206 | 6.831182  | 0.588091  |
| 51  | 6 | 0 | 7.221257  | 1.623066  | -1.279281 |
| 52  | 1 | 0 | 7.459142  | 1.801685  | -2.321352 |
| 53  | 1 | 0 | 7.220818  | 2.584706  | -0.779048 |
| 54  | 6 | 0 | -4.839979 | 4.843969  | 2.203065  |
| 55  | 6 | 0 | 5.863260  | 0.899291  | -1.160741 |
| 56  | 6 | 0 | 4.588119  | 1.713031  | -1.221006 |
| 57  | 6 | 0 | 3.347993  | 1.017870  | -1.755628 |
| 58  | 1 | 0 | 3.447308  | 0.927590  | -2.831502 |
| 59  | 1 | 0 | 2.510179  | 1.672716  | -1.557871 |
| 60  | 6 | 0 | 3.017622  | -0.386565 | -1.187201 |
| 61  | 1 | 0 | 1.940539  | -0.482598 | -1.179471 |
| 62  | 1 | 0 | 3.406436  | -1.146977 | -1.854763 |
| 63  | 6 | 0 | 3.999055  | -2.201233 | 1.983722  |
| 64  | 6 | 0 | -1.993563 | -2.127509 | 0.574403  |
| 65  | 6 | 0 | -1.282637 | -2.604267 | -0.472937 |
| 66  | 6 | 0 | 0.142177  | -2.398918 | -0.198085 |
| 67  | 6 | 0 | -1.839381 | -3.238756 | -1.741502 |
| 68  | 6 | 0 | -0.729375 | -3.484156 | -2.779390 |
| 69  | 1 | 0 | -1.152494 | -3.928998 | -3.672419 |
| 70  | 1 | 0 | 0.031340  | -4.158699 | -2.403846 |
| 71  | 1 | 0 | -0.249087 | -2.555529 | -3.067073 |
| 72  | 6 | 0 | -2.911690 | -2.305508 | -2.370225 |
| 73  | 1 | 0 | -3.036492 | -2.591271 | -3.409662 |
| 74  | 1 | 0 | -2.527937 | -1.291495 | -2.374513 |
| 75  | 6 | 0 | -4.281180 | -2.373013 | -1.662756 |
| 76  | 1 | 0 | -4.704318 | -1.380504 | -1.558430 |
| 77  | 1 | 0 | -4.982376 | -2.942139 | -2.260979 |
| 78  | 6 | 0 | -4.223202 | -3.040855 | -0.275500 |
| 79  | 1 | 0 | -5.227833 | -3.091825 | 0.118679  |
| 80  | 6 | 0 | -3.650248 | -4.472188 | -0.365060 |
| 81  | 1 | 0 | -3.257096 | -4.743865 | 0.611573  |
| 82  | 6 | 0 | -2.507827 | -4.594917 | -1.412591 |
| 83  | 1 | 0 | -2.899211 | -4.992467 | -2.344860 |
| 84  | 1 | 0 | -1.753707 | -5.294038 | -1.065354 |
| 85  | 6 | 0 | -4.733400 | -5.480662 | -0.688046 |
| 86  | 6 | 0 | -3.435354 | -2.207863 | 0.716106  |
| 87  | 6 | 0 | -0.070482 | 1.715531  | 0.569436  |
| 88  | 6 | 0 | -1.612236 | 5.620533  | -0.778879 |
| 89  | 6 | 0 | -0.191677 | 5.629624  | -1.255488 |
| 90  | 1 | 0 | 0.022919  | 6.543938  | -1.795804 |
| 91  | 1 | 0 | 0.010130  | 4.789901  | -1.910680 |
| 92  | 1 | 0 | 0.500731  | 5.545399  | -0.425145 |
| 93  | 6 | 0 | -2.522830 | 6.563762  | -0.978512 |
| 94  | 6 | 0 | -4.511648 | 4.144263  | 1.123829  |
| 95  | 6 | 0 | -4.903618 | 2.674821  | 1.020564  |
| 96  | 1 | 0 | -5.774673 | 2.591355  | 0.376737  |
| 97  | 1 | 0 | -5.227547 | 2.360622  | 2.006413  |
| 98  | 6 | 0 | -3.841551 | 1.670843  | 0.505161  |
| 99  | 1 | 0 | -4.061265 | 0.712407  | 0.956914  |
| 100 | 1 | 0 | -3.943411 | 1.552763  | -0.566394 |
| 101 | 6 | 0 | -1.190070 | -2.344411 | 2.958396  |
| 102 | 1 | 0 | -2.200426 | -2.265525 | 3.335755  |
| 103 | 1 | 0 | -0.514221 | -1.954206 | 3.710238  |
| 104 | 1 | 0 | -0.956440 | -3.392259 | 2.805796  |
| 105 | 6 | 0 | 8.119887  | -1.238915 | 1.094895  |

|     |   |   |          |           |          |
|-----|---|---|----------|-----------|----------|
| 106 | 1 | 0 | 9.199887 | -1.229255 | 1.007078 |
| 107 | 1 | 0 | 7.762741 | -2.231657 | 0.846115 |
| 108 | 1 | 0 | 7.853178 | -1.071921 | 2.132262 |

-----  
Rotational constants (GHZ): 0.0556079 0.0382099 0.0259206

Rotatory strengths (R) in cgs ( $10^{*-40}$  erg-esu-cm/Gauss) of **1**.

| State | XX       | YY       | ZZ       | R (velocity) | E-M Angle |
|-------|----------|----------|----------|--------------|-----------|
| 1     | 0.6191   | 31.5184  | 25.7367  | 19.2914      | 29.95     |
| 2     | -95.6667 | 3.6235   | -39.8323 | -43.9585     | 94.04     |
| 3     | -0.3675  | 0.0640   | -0.1661  | -0.1565      | 130.10    |
| 4     | 0.0237   | 0.1162   | 0.0142   | 0.0514       | 90.00     |
| 5     | 3.3344   | 0.3413   | 0.5014   | 1.3924       | 60.85     |
| 6     | -7.7518  | 2.0283   | -5.4258  | -3.7164      | 121.24    |
| 7     | -18.4962 | 6.9694   | -7.0264  | -6.1844      | 109.35    |
| 8     | -3.4365  | 1.6542   | -5.3726  | -2.3850      | 102.44    |
| 9     | 5.2488   | 2.5351   | 11.6294  | 6.4711       | 64.58     |
| 10    | 3.1675   | -0.1689  | 0.8261   | 1.2749       | 76.25     |
| 11    | -38.9732 | -9.9809  | -30.1461 | -26.3667     | 114.43    |
| 12    | 0.9604   | -2.8264  | -3.3131  | -1.7264      | 100.79    |
| 13    | 3.1814   | 0.6128   | 10.1393  | 4.6445       | 41.75     |
| 14    | 37.3088  | 64.3440  | -15.3954 | 28.7525      | 65.49     |
| 15    | 0.9334   | 10.0021  | -3.6256  | 2.4366       | 17.64     |
| 16    | 1.2258   | 1.8362   | 3.5310   | 2.1977       | 43.95     |
| 17    | -3.1860  | -36.3152 | -3.3775  | -14.2929     | 112.83    |
| 18    | 0.2487   | -2.6991  | -4.0934  | -2.1813      | 105.32    |
| 19    | -15.2694 | 21.4888  | 1.0179   | 2.4125       | 61.23     |
| 20    | -7.5567  | -3.2038  | 0.2972   | -3.4878      | 104.54    |
| 21    | 0.0816   | 0.2267   | -2.0223  | -0.5713      | 94.21     |
| 22    | 0.6966   | -0.9195  | -1.2025  | -0.4751      | 97.75     |
| 23    | 6.4598   | 16.8101  | 3.9158   | 9.0619       | 55.11     |
| 24    | -0.2240  | 0.8222   | -1.2366  | -0.2128      | 92.98     |
| 25    | 5.8942   | 6.0599   | 1.3518   | 4.4353       | 27.39     |
| 26    | 0.0980   | 0.0946   | -0.2059  | -0.0044      | 90.00     |
| 27    | -1.0154  | -13.2296 | 3.9808   | -3.4214      | 91.87     |
| 28    | 74.6931  | 66.9254  | 0.3381   | 47.3189      | 40.18     |
| 29    | 2.2484   | -11.6413 | 6.9361   | -0.8190      | 92.49     |
| 30    | -42.7408 | 43.8082  | -8.9025  | -2.6117      | 92.05     |

$1/2[ \langle 0|r|b \rangle \langle b|rx|0 \rangle + \langle 0|rx|b \rangle \langle b|r|0 \rangle ]$

Rotatory Strengths (R) in cgs ( $10^{*-40}$  erg-esu-cm/Gauss)

| State | XX       | YY        | ZZ       | R (length) |
|-------|----------|-----------|----------|------------|
| 1     | 56.2607  | -5.9740   | 6.6950   | 18.9939    |
| 2     | -67.4221 | -123.0492 | 54.6145  | -45.2856   |
| 3     | 0.0040   | -0.3569   | -0.1275  | -0.1601    |
| 4     | 0.1352   | 0.0351    | -0.0278  | 0.0475     |
| 5     | 1.9874   | 4.2629    | -2.0510  | 1.3998     |
| 6     | -0.0087  | -4.3538   | -6.9753  | -3.7793    |
| 7     | 1.0347   | -24.1507  | 5.4132   | -5.9009    |
| 8     | 4.1184   | -5.6724   | -5.6887  | -2.4143    |
| 9     | 6.8988   | 13.9744   | -1.3997  | 6.4911     |
| 10    | -1.8413  | 3.0932    | 3.0589   | 1.4369     |
| 11    | -0.1170  | -1.7526   | -79.4872 | -27.1189   |
| 12    | -6.8521  | -1.4313   | 3.0856   | -1.7326    |
| 13    | 1.3525   | 12.4192   | -0.5087  | 4.4210     |
| 14    | -39.8479 | 6.7270    | 119.3524 | 28.7438    |
| 15    | 5.9842   | 0.9539    | 0.3543   | 2.4308     |
| 16    | 4.2442   | 2.4952    | -0.2347  | 2.1682     |



|    |          |          |          |          |
|----|----------|----------|----------|----------|
| 17 | -24.4878 | 3.8759   | -23.2889 | -14.6336 |
| 18 | -8.2072  | -4.2407  | 5.6129   | -2.2783  |
| 19 | 8.4920   | 1.6876   | -2.5879  | 2.5306   |
| 20 | 1.8831   | -6.0027  | -7.1002  | -3.7399  |
| 21 | -1.6394  | -2.4908  | 2.3276   | -0.6009  |
| 22 | -3.1536  | 0.0171   | 1.4635   | -0.5577  |
| 23 | 14.5201  | -5.8205  | 17.9635  | 8.8877   |
| 24 | -0.5028  | -2.3475  | 2.2512   | -0.1997  |
| 25 | 0.5935   | 0.2047   | 12.2468  | 4.3484   |
| 26 | -0.2987  | 0.0766   | 0.2640   | 0.0140   |
| 27 | -1.5678  | 80.0071  | -88.3081 | -3.2896  |
| 28 | 27.5265  | 10.0530  | 107.1565 | 48.2454  |
| 29 | 1.5889   | 19.6689  | -23.1255 | -0.6226  |
| 30 | 96.8843  | -33.5673 | -70.0961 | -2.2597  |

1/2[ $\langle 0|\text{del}|b\rangle\langle b|r|0\rangle + (\langle 0|r|b\rangle\langle b|\text{del}|0\rangle)^*$ ] (Au)

| State | X       | Y       | Z       | Dip. S. | Osc.(frdel) |
|-------|---------|---------|---------|---------|-------------|
| 1     | -0.0022 | -0.0001 | -0.0002 | 0.0025  | 0.0017      |
| 2     | -0.3570 | -0.0272 | -0.0004 | 0.3845  | 0.2563      |
| 3     | 0.0000  | -0.0002 | 0.0000  | 0.0003  | 0.0002      |
| 4     | -0.0001 | 0.0000  | 0.0000  | 0.0001  | 0.0001      |
| 5     | -0.0005 | -0.0006 | -0.0003 | 0.0014  | 0.0009      |
| 6     | 0.0000  | -0.0053 | -0.0009 | 0.0061  | 0.0041      |
| 7     | -0.0068 | -0.0134 | -0.0002 | 0.0205  | 0.0136      |
| 8     | -0.0005 | -0.0060 | -0.0003 | 0.0067  | 0.0045      |
| 9     | -0.0094 | -0.0149 | 0.0000  | 0.0243  | 0.0162      |
| 10    | -0.0017 | -0.0002 | -0.0001 | 0.0020  | 0.0014      |
| 11    | 0.0000  | -0.0304 | -0.0124 | 0.0427  | 0.0285      |
| 12    | -0.0018 | 0.0000  | 0.0000  | 0.0019  | 0.0012      |
| 13    | -0.0001 | -0.0056 | -0.0007 | 0.0063  | 0.0042      |
| 14    | -0.0062 | -0.0238 | -0.0577 | 0.0877  | 0.0585      |
| 15    | -0.0013 | -0.0005 | -0.0001 | 0.0019  | 0.0013      |
| 16    | -0.0007 | -0.0019 | 0.0000  | 0.0026  | 0.0017      |
| 17    | -0.0095 | -0.0070 | -0.0008 | 0.0173  | 0.0115      |
| 18    | -0.0013 | -0.0005 | -0.0001 | 0.0019  | 0.0012      |
| 19    | -0.0022 | -0.0002 | -0.0025 | 0.0049  | 0.0033      |
| 20    | 0.0000  | -0.0006 | -0.0007 | 0.0013  | 0.0009      |
| 21    | 0.0000  | -0.0010 | -0.0001 | 0.0011  | 0.0008      |
| 22    | -0.0012 | 0.0000  | 0.0000  | 0.0012  | 0.0008      |
| 23    | -0.0009 | -0.0002 | -0.0003 | 0.0014  | 0.0009      |
| 24    | 0.0000  | -0.0004 | -0.0001 | 0.0004  | 0.0003      |
| 25    | 0.0000  | 0.0000  | -0.0004 | 0.0004  | 0.0002      |
| 26    | -0.0001 | -0.0001 | 0.0000  | 0.0001  | 0.0001      |
| 27    | -0.0051 | -0.0208 | -0.0024 | 0.0283  | 0.0189      |
| 28    | -0.0010 | -0.0040 | -0.0229 | 0.0278  | 0.0185      |
| 29    | -0.0002 | -0.0007 | -0.0030 | 0.0039  | 0.0026      |
| 30    | -0.0238 | -0.0218 | -0.0119 | 0.0575  | 0.0383      |

Excitation energies and oscillator strengths:

Excited State 1: Singlet-A 3.5501 eV 349.24 nm  $f=0.0017$   $\langle S^2 \rangle=0.000$   
 193 -> 199 -0.13307  
 195 -> 199 0.67375

This state for optimization and/or second-order correction.

Total Energy, E(TD-HF/TD-KS) = -2424.82468533

Copying the excited state density for this state as the 1-particle RhoCI density.

Excited State 2: Singlet-A 3.8569 eV 321.46 nm  $f=0.2580$   $\langle S^2 \rangle=0.000$   
 198 -> 199 0.69720

|                                                                                         |                                                                     |           |           |            |                                   |
|-----------------------------------------------------------------------------------------|---------------------------------------------------------------------|-----------|-----------|------------|-----------------------------------|
| Excited State 3:<br>197 -> 199                                                          | Singlet-A<br>0.70661                                                | 4.2169 eV | 294.02 nm | $f=0.0002$ | $\langle S^{**2} \rangle = 0.000$ |
| Excited State 4:<br>196 -> 199                                                          | Singlet-A<br>0.70273                                                | 4.3894 eV | 282.46 nm | $f=0.0001$ | $\langle S^{**2} \rangle = 0.000$ |
| Excited State 5:<br>194 -> 199                                                          | Singlet-A<br>0.70084                                                | 4.5223 eV | 274.16 nm | $f=0.0009$ | $\langle S^{**2} \rangle = 0.000$ |
| Excited State 6:<br>193 -> 199<br>195 -> 199                                            | Singlet-A<br>0.69011<br>0.13997                                     | 4.5498 eV | 272.50 nm | $f=0.0041$ | $\langle S^{**2} \rangle = 0.000$ |
| Excited State 7:<br>198 -> 200                                                          | Singlet-A<br>0.70375                                                | 4.8201 eV | 257.22 nm | $f=0.0135$ | $\langle S^{**2} \rangle = 0.000$ |
| Excited State 8:<br>192 -> 199                                                          | Singlet-A<br>0.69538                                                | 4.9978 eV | 248.08 nm | $f=0.0045$ | $\langle S^{**2} \rangle = 0.000$ |
| Excited State 9:<br>198 -> 202                                                          | Singlet-A<br>0.68708                                                | 5.0658 eV | 244.75 nm | $f=0.0164$ | $\langle S^{**2} \rangle = 0.000$ |
| Excited State 10:<br>198 -> 201                                                         | Singlet-A<br>0.70071                                                | 5.1055 eV | 242.84 nm | $f=0.0014$ | $\langle S^{**2} \rangle = 0.000$ |
| Excited State 11:<br>187 -> 199<br>188 -> 199<br>189 -> 199<br>190 -> 199               | Singlet-A<br>0.12633<br>-0.38308<br>0.51694<br>0.15601              | 5.1680 eV | 239.91 nm | $f=0.0286$ | $\langle S^{**2} \rangle = 0.000$ |
| Excited State 12:<br>185 -> 199<br>188 -> 199<br>189 -> 199<br>191 -> 199               | Singlet-A<br>-0.10735<br>0.23332<br>0.22357<br>0.60430              | 5.2918 eV | 234.29 nm | $f=0.0013$ | $\langle S^{**2} \rangle = 0.000$ |
| Excited State 13:<br>188 -> 200<br>189 -> 200<br>193 -> 200<br>195 -> 200               | Singlet-A<br>0.10637<br>-0.12710<br>-0.10825<br>0.64161             | 5.3209 eV | 233.01 nm | $f=0.0042$ | $\langle S^{**2} \rangle = 0.000$ |
| Excited State 14:<br>186 -> 199<br>187 -> 199<br>195 -> 200<br>198 -> 206<br>198 -> 209 | Singlet-A<br>-0.12977<br>0.57380<br>-0.12321<br>0.22786<br>-0.15868 | 5.3533 eV | 231.60 nm | $f=0.0591$ | $\langle S^{**2} \rangle = 0.000$ |
| Excited State 15:<br>197 -> 203<br>198 -> 202<br>198 -> 203<br>198 -> 204<br>198 -> 205 | Singlet-A<br>-0.12511<br>0.10489<br>0.64902<br>-0.16174<br>-0.10191 | 5.4393 eV | 227.94 nm | $f=0.0013$ | $\langle S^{**2} \rangle = 0.000$ |

|                   |           |           |           |            |                                  |
|-------------------|-----------|-----------|-----------|------------|----------------------------------|
| Excited State 16: | Singlet-A | 5.4544 eV | 227.31 nm | $f=0.0017$ | $\langle S^{*2} \rangle = 0.000$ |
| 189 -> 199        | -0.17234  |           |           |            |                                  |
| 190 -> 199        | 0.64458   |           |           |            |                                  |
| 192 -> 202        | 0.10947   |           |           |            |                                  |
| 197 -> 203        | -0.12503  |           |           |            |                                  |
| Excited State 17: | Singlet-A | 5.4572 eV | 227.19 nm | $f=0.0116$ | $\langle S^{*2} \rangle = 0.000$ |
| 190 -> 199        | 0.17851   |           |           |            |                                  |
| 197 -> 202        | 0.16671   |           |           |            |                                  |
| 197 -> 203        | 0.57731   |           |           |            |                                  |
| 197 -> 204        | 0.19256   |           |           |            |                                  |
| 198 -> 204        | -0.20738  |           |           |            |                                  |
| Excited State 18: | Singlet-A | 5.4660 eV | 226.83 nm | $f=0.0013$ | $\langle S^{*2} \rangle = 0.000$ |
| 185 -> 199        | -0.23182  |           |           |            |                                  |
| 188 -> 199        | 0.39942   |           |           |            |                                  |
| 189 -> 199        | 0.25168   |           |           |            |                                  |
| 191 -> 199        | -0.30693  |           |           |            |                                  |
| 198 -> 203        | -0.10909  |           |           |            |                                  |
| 198 -> 204        | -0.26946  |           |           |            |                                  |
| Excited State 19: | Singlet-A | 5.4683 eV | 226.73 nm | $f=0.0034$ | $\langle S^{*2} \rangle = 0.000$ |
| 185 -> 199        | -0.11570  |           |           |            |                                  |
| 188 -> 199        | 0.18417   |           |           |            |                                  |
| 191 -> 199        | -0.14174  |           |           |            |                                  |
| 197 -> 203        | 0.17766   |           |           |            |                                  |
| 198 -> 203        | 0.20308   |           |           |            |                                  |
| 198 -> 204        | 0.55701   |           |           |            |                                  |
| Excited State 20: | Singlet-A | 5.4781 eV | 226.33 nm | $f=0.0009$ | $\langle S^{*2} \rangle = 0.000$ |
| 190 -> 199        | 0.12030   |           |           |            |                                  |
| 192 -> 202        | -0.50571  |           |           |            |                                  |
| 195 -> 202        | -0.13034  |           |           |            |                                  |
| 197 -> 202        | 0.33543   |           |           |            |                                  |
| 197 -> 203        | -0.17149  |           |           |            |                                  |
| 198 -> 204        | 0.10352   |           |           |            |                                  |
| Excited State 21: | Singlet-A | 5.5017 eV | 225.35 nm | $f=0.0008$ | $\langle S^{*2} \rangle = 0.000$ |
| 181 -> 199        | -0.10221  |           |           |            |                                  |
| 185 -> 199        | 0.56186   |           |           |            |                                  |
| 186 -> 199        | 0.15484   |           |           |            |                                  |
| 188 -> 199        | 0.26191   |           |           |            |                                  |
| 189 -> 199        | 0.16596   |           |           |            |                                  |
| Excited State 22: | Singlet-A | 5.5422 eV | 223.71 nm | $f=0.0008$ | $\langle S^{*2} \rangle = 0.000$ |
| 198 -> 204        | -0.11224  |           |           |            |                                  |
| 198 -> 205        | 0.64196   |           |           |            |                                  |
| 198 -> 206        | 0.16716   |           |           |            |                                  |
| Excited State 23: | Singlet-A | 5.5480 eV | 223.48 nm | $f=0.0008$ | $\langle S^{*2} \rangle = 0.000$ |
| 187 -> 200        | -0.28283  |           |           |            |                                  |
| 188 -> 200        | 0.34016   |           |           |            |                                  |
| 189 -> 200        | -0.43625  |           |           |            |                                  |
| 190 -> 200        | -0.11591  |           |           |            |                                  |
| 195 -> 200        | -0.20142  |           |           |            |                                  |
| Excited State 24: | Singlet-A | 5.5633 eV | 222.86 nm | $f=0.0003$ | $\langle S^{*2} \rangle = 0.000$ |

|                   |           |           |           |            |                                  |
|-------------------|-----------|-----------|-----------|------------|----------------------------------|
| 192 -> 202        | 0.33047   |           |           |            |                                  |
| 195 -> 202        | 0.11702   |           |           |            |                                  |
| 197 -> 200        | 0.14669   |           |           |            |                                  |
| 197 -> 202        | 0.55500   |           |           |            |                                  |
| 197 -> 203        | -0.13468  |           |           |            |                                  |
| Excited State 25: | Singlet-A | 5.5755 eV | 222.37 nm | $f=0.0003$ | $\langle S^{*2} \rangle = 0.000$ |
| 188 -> 201        | -0.30076  |           |           |            |                                  |
| 189 -> 201        | -0.22327  |           |           |            |                                  |
| 191 -> 201        | -0.27018  |           |           |            |                                  |
| 196 -> 201        | 0.50782   |           |           |            |                                  |
| Excited State 26: | Singlet-A | 5.6073 eV | 221.11 nm | $f=0.0001$ | $\langle S^{*2} \rangle = 0.000$ |
| 197 -> 200        | 0.68777   |           |           |            |                                  |
| 197 -> 202        | -0.14531  |           |           |            |                                  |
| Excited State 27: | Singlet-A | 5.6337 eV | 220.08 nm | $f=0.0191$ | $\langle S^{*2} \rangle = 0.000$ |
| 196 -> 202        | -0.17340  |           |           |            |                                  |
| 196 -> 203        | -0.19433  |           |           |            |                                  |
| 196 -> 204        | 0.62314   |           |           |            |                                  |
| 196 -> 208        | -0.13553  |           |           |            |                                  |
| Excited State 28: | Singlet-A | 5.6404 eV | 219.82 nm | $f=0.0187$ | $\langle S^{*2} \rangle = 0.000$ |
| 183 -> 199        | 0.12331   |           |           |            |                                  |
| 185 -> 199        | 0.10900   |           |           |            |                                  |
| 188 -> 201        | -0.16610  |           |           |            |                                  |
| 189 -> 201        | -0.12148  |           |           |            |                                  |
| 191 -> 201        | -0.14910  |           |           |            |                                  |
| 192 -> 202        | -0.11025  |           |           |            |                                  |
| 195 -> 202        | 0.28664   |           |           |            |                                  |
| 195 -> 206        | -0.18039  |           |           |            |                                  |
| 195 -> 209        | 0.17457   |           |           |            |                                  |
| 196 -> 201        | -0.27704  |           |           |            |                                  |
| 198 -> 206        | -0.22693  |           |           |            |                                  |
| 198 -> 209        | 0.11985   |           |           |            |                                  |
| Excited State 29: | Singlet-A | 5.6437 eV | 219.69 nm | $f=0.0024$ | $\langle S^{*2} \rangle = 0.000$ |
| 188 -> 201        | 0.26991   |           |           |            |                                  |
| 189 -> 201        | 0.19872   |           |           |            |                                  |
| 191 -> 201        | 0.24033   |           |           |            |                                  |
| 195 -> 202        | 0.20881   |           |           |            |                                  |
| 195 -> 206        | -0.12602  |           |           |            |                                  |
| 195 -> 209        | 0.12284   |           |           |            |                                  |
| 196 -> 201        | 0.40075   |           |           |            |                                  |
| Excited State 30: | Singlet-A | 5.6829 eV | 218.17 nm | $f=0.0388$ | $\langle S^{*2} \rangle = 0.000$ |
| 181 -> 199        | 0.10324   |           |           |            |                                  |
| 183 -> 199        | -0.11496  |           |           |            |                                  |
| 185 -> 199        | -0.12838  |           |           |            |                                  |
| 186 -> 199        | 0.47341   |           |           |            |                                  |
| 187 -> 199        | 0.28131   |           |           |            |                                  |
| 198 -> 206        | -0.29467  |           |           |            |                                  |
| 198 -> 209        | 0.12368   |           |           |            |                                  |

SavETr: write IOETrn= 770 NScale= 10 NData= 16 NLR=1 NState= 30 LETran= 550.  
 \*\*\*\*\*

Rotatory strengths (R) in cgs ( $10^{*-40}$  erg-esu-cm/Gauss) of **2**.

| State | XX       | YY       | ZZ       | R (velocity) | E-M Angle |
|-------|----------|----------|----------|--------------|-----------|
| 1     | 1.2298   | 28.6075  | 23.9991  | 17.9454      | 36.03     |
| 2     | -68.1484 | -34.7558 | 16.7547  | -28.7165     | 92.45     |
| 3     | -0.4214  | -0.1460  | -0.1108  | -0.2261      | 90.00     |
| 4     | 0.0526   | 0.1336   | 0.0170   | 0.0678       | 90.00     |
| 5     | 3.8417   | 0.7290   | -0.0497  | 1.5070       | 67.28     |
| 6     | -5.5829  | 0.3375   | -3.9587  | -3.0680      | 139.84    |
| 7     | -2.7237  | -0.8339  | -5.6224  | -3.0600      | 112.91    |
| 8     | 2.1470   | 3.1970   | 7.1416   | 4.1619       | 45.49     |
| 9     | -5.6417  | -1.2882  | -2.9653  | -3.2984      | 106.08    |
| 10    | 7.0611   | -3.8472  | 5.3299   | 2.8480       | 77.80     |
| 11    | 12.7705  | -3.1653  | 4.3336   | 4.6463       | 70.83     |
| 12    | -12.6493 | 73.6507  | -73.5562 | -4.1849      | 91.77     |
| 13    | 4.1527   | -8.2433  | -0.7746  | -1.6217      | 103.69    |
| 14    | 1.0212   | 0.2352   | 0.1478   | 0.4681       | 38.95     |
| 15    | 4.7738   | 9.3268   | -1.5809  | 4.1732       | 67.90     |
| 16    | 3.6334   | -8.6968  | -9.0102  | -4.6912      | 125.54    |
| 17    | 4.0072   | 11.9883  | 12.9129  | 9.6361       | 73.73     |
| 18    | 2.0910   | -17.7413 | -13.0170 | -9.5558      | 133.18    |
| 19    | -5.9649  | -4.1918  | -2.7973  | -4.3180      | 125.77    |
| 20    | -10.7558 | 6.8774   | 3.8829   | 0.0015       | 90.00     |
| 21    | -2.0243  | 4.5675   | 4.3025   | 2.2819       | 64.19     |
| 22    | -22.6071 | 2.3211   | 8.3060   | -3.9934      | 106.76    |
| 23    | 6.6401   | 4.7531   | 3.0519   | 4.8150       | 45.75     |
| 24    | 2.9631   | 1.4709   | -2.7433  | 0.5636       | 84.45     |
| 25    | -6.8779  | 9.5227   | 17.6721  | 6.7723       | 75.47     |
| 26    | 5.5677   | -9.0587  | -11.2514 | -4.9141      | 121.49    |
| 27    | -11.4194 | -22.7936 | -1.6950  | -11.9694     | 96.51     |
| 28    | 9.9666   | -6.8376  | -8.1888  | -1.6866      | 102.33    |
| 29    | 10.7816  | 24.6619  | 4.0774   | 13.1736      | 33.66     |
| 30    | 65.6167  | 49.3414  | 2.9063   | 39.2881      | 64.87     |

$$1/2[<0|r|b>*<b|rxdel|0> + (<0|rxdel|b>*<b|r|0>)*]$$

Rotatory Strengths (R) in cgs ( $10^{*-40}$  erg-esu-cm/Gauss)

| State | XX       | YY       | ZZ       | R (length) |
|-------|----------|----------|----------|------------|
| 1     | 52.3403  | -6.2919  | 7.5612   | 17.8699    |
| 2     | -20.3309 | -33.7024 | -34.1476 | -29.3936   |
| 3     | -0.2441  | -0.4199  | -0.0228  | -0.2289    |
| 4     | 0.1752   | 0.0520   | -0.0428  | 0.0615     |
| 5     | 2.8631   | 4.5176   | -2.8706  | 1.5034     |
| 6     | -3.5822  | -4.4089  | -1.3222  | -3.1044    |
| 7     | -1.4722  | -6.1159  | -1.8225  | -3.1369    |
| 8     | 2.3574   | 8.9076   | 1.3405   | 4.2018     |
| 9     | -1.5574  | -7.2865  | -0.7062  | -3.1834    |
| 10    | -12.0495 | 13.2321  | 7.0344   | 2.7390     |
| 11    | -13.3571 | 17.7740  | 9.8090   | 4.7420     |
| 12    | -87.1315 | 48.7693  | 24.3839  | -4.6595    |
| 13    | -7.3740  | 0.4690   | 1.6407   | -1.7548    |
| 14    | -0.0201  | 0.0839   | 1.3486   | 0.4708     |
| 15    | -7.7979  | 3.0067   | 16.9143  | 4.0410     |
| 16    | -16.4499 | 1.4062   | 3.2502   | -3.9311    |
| 17    | 20.6193  | 15.3551  | -8.3453  | 9.2097     |
| 18    | -26.5690 | 0.1273   | -3.2124  | -9.8847    |
| 19    | -0.4188  | -8.0780  | -4.6247  | -4.3738    |
| 20    | 17.5903  | 0.9377   | -18.1501 | 0.1260     |
| 21    | 10.5699  | -2.4186  | -1.3457  | 2.2685     |
| 22    | 13.7920  | -1.1761  | -23.9306 | -3.7716    |

|                                                                                                                         |          |          |           |          |             |
|-------------------------------------------------------------------------------------------------------------------------|----------|----------|-----------|----------|-------------|
| 23                                                                                                                      | -1.9511  | 6.1064   | 9.8954    | 4.6836   |             |
| 24                                                                                                                      | 0.0481   | -4.2519  | 6.8498    | 0.8820   |             |
| 25                                                                                                                      | 31.1794  | -28.7329 | 17.5386   | 6.6617   |             |
| 26                                                                                                                      | -19.4665 | -0.5324  | 4.3362    | -5.2209  |             |
| 27                                                                                                                      | 0.0693   | 79.2422  | -113.2828 | -11.3238 |             |
| 28                                                                                                                      | -10.5774 | -2.5239  | 6.6768    | -2.1415  |             |
| 29                                                                                                                      | 6.9043   | 1.1287   | 31.2699   | 13.1010  |             |
| 30                                                                                                                      | 36.5253  | 76.6937  | 8.6978    | 40.6389  |             |
| 1/2[ $\langle 0 \text{del} b\rangle\langle b r 0\rangle + (\langle 0 r b\rangle\langle b \text{del} 0\rangle)^*$ ] (Au) |          |          |           |          |             |
| State                                                                                                                   | X        | Y        | Z         | Dip. S.  | Osc.(frdel) |
| 1                                                                                                                       | -0.0027  | -0.0001  | -0.0002   | 0.0030   | 0.0020      |
| 2                                                                                                                       | -0.4024  | -0.0091  | -0.0001   | 0.4116   | 0.2744      |
| 3                                                                                                                       | -0.0001  | -0.0003  | 0.0000    | 0.0004   | 0.0003      |
| 4                                                                                                                       | -0.0002  | 0.0000   | 0.0000    | 0.0002   | 0.0001      |
| 5                                                                                                                       | -0.0009  | -0.0007  | -0.0002   | 0.0019   | 0.0012      |
| 6                                                                                                                       | -0.0005  | -0.0034  | -0.0003   | 0.0043   | 0.0029      |
| 7                                                                                                                       | -0.0001  | -0.0053  | 0.0000    | 0.0054   | 0.0036      |
| 8                                                                                                                       | -0.0135  | -0.0154  | -0.0003   | 0.0292   | 0.0195      |
| 9                                                                                                                       | -0.0013  | -0.0041  | 0.0000    | 0.0055   | 0.0036      |
| 10                                                                                                                      | -0.0047  | -0.0015  | -0.0005   | 0.0066   | 0.0044      |
| 11                                                                                                                      | -0.0059  | -0.0038  | -0.0019   | 0.0115   | 0.0077      |
| 12                                                                                                                      | -0.0067  | -0.0601  | -0.0769   | 0.1436   | 0.0957      |
| 13                                                                                                                      | -0.0010  | 0.0000   | -0.0061   | 0.0071   | 0.0047      |
| 14                                                                                                                      | 0.0000   | -0.0001  | -0.0001   | 0.0002   | 0.0002      |
| 15                                                                                                                      | -0.0005  | -0.0011  | -0.0045   | 0.0061   | 0.0041      |
| 16                                                                                                                      | -0.0007  | 0.0000   | -0.0003   | 0.0011   | 0.0007      |
| 17                                                                                                                      | -0.0111  | -0.0083  | -0.0001   | 0.0195   | 0.0130      |
| 18                                                                                                                      | -0.0008  | 0.0000   | -0.0012   | 0.0020   | 0.0013      |
| 19                                                                                                                      | 0.0000   | -0.0004  | -0.0002   | 0.0006   | 0.0004      |
| 20                                                                                                                      | -0.0014  | -0.0003  | -0.0024   | 0.0041   | 0.0028      |
| 21                                                                                                                      | -0.0002  | -0.0001  | 0.0000    | 0.0003   | 0.0002      |
| 22                                                                                                                      | -0.0020  | 0.0000   | -0.0016   | 0.0036   | 0.0024      |
| 23                                                                                                                      | 0.0000   | -0.0005  | -0.0003   | 0.0008   | 0.0005      |
| 24                                                                                                                      | 0.0000   | -0.0016  | -0.0003   | 0.0019   | 0.0013      |
| 25                                                                                                                      | -0.0096  | -0.0050  | -0.0026   | 0.0172   | 0.0114      |
| 26                                                                                                                      | -0.0014  | -0.0001  | -0.0010   | 0.0025   | 0.0017      |
| 27                                                                                                                      | -0.0067  | -0.0168  | -0.0039   | 0.0273   | 0.0182      |
| 28                                                                                                                      | -0.0011  | -0.0001  | -0.0014   | 0.0027   | 0.0018      |
| 29                                                                                                                      | -0.0002  | 0.0000   | -0.0027   | 0.0029   | 0.0019      |
| 30                                                                                                                      | -0.0010  | -0.0265  | -0.0269   | 0.0544   | 0.0362      |

Excitation energies and oscillator strengths:

Excited State 1: Singlet-A 3.4883 eV 355.43 nm  $f=0.0021$   $\langle S^{*2}\rangle=0.000$   
 193 -> 199 0.20366  
 195 -> 199 0.65452  
 198 -> 199 0.10166

This state for optimization and/or second-order correction.

Total Energy, E(TD-HF/TD-KS) = -2424.82600882

Copying the excited state density for this state as the 1-particle RhoCI density.

Excited State 2: Singlet-A 3.8397 eV 322.90 nm  $f=0.2765$   $\langle S^{*2}\rangle=0.000$   
 198 -> 199 0.69612

Excited State 3: Singlet-A 4.0840 eV 303.58 nm  $f=0.0003$   $\langle S^{*2}\rangle=0.000$   
 197 -> 199 0.70670

|                                                                                                                     |                                                                                         |           |           |            |                                   |
|---------------------------------------------------------------------------------------------------------------------|-----------------------------------------------------------------------------------------|-----------|-----------|------------|-----------------------------------|
| Excited State 4:<br>196 -> 199                                                                                      | Singlet-A<br>0.70314                                                                    | 4.2550 eV | 291.38 nm | $f=0.0001$ | $\langle S^{**2} \rangle = 0.000$ |
| Excited State 5:<br>194 -> 199                                                                                      | Singlet-A<br>0.69919                                                                    | 4.3913 eV | 282.34 nm | $f=0.0012$ | $\langle S^{**2} \rangle = 0.000$ |
| Excited State 6:<br>193 -> 199<br>195 -> 199                                                                        | Singlet-A<br>0.66989<br>-0.21355                                                        | 4.4157 eV | 280.78 nm | $f=0.0029$ | $\langle S^{**2} \rangle = 0.000$ |
| Excited State 7:<br>192 -> 199                                                                                      | Singlet-A<br>0.69895                                                                    | 4.8944 eV | 253.32 nm | $f=0.0037$ | $\langle S^{**2} \rangle = 0.000$ |
| Excited State 8:<br>198 -> 200<br>198 -> 202                                                                        | Singlet-A<br>0.68769<br>0.13808                                                         | 5.0185 eV | 247.05 nm | $f=0.0197$ | $\langle S^{**2} \rangle = 0.000$ |
| Excited State 9:<br>189 -> 199<br>191 -> 199<br>198 -> 200<br>198 -> 201<br>198 -> 202                              | Singlet-A<br>-0.14665<br>-0.25279<br>-0.11068<br>-0.36223<br>0.50406                    | 5.1643 eV | 240.08 nm | $f=0.0036$ | $\langle S^{**2} \rangle = 0.000$ |
| Excited State 10:<br>189 -> 199<br>191 -> 199<br>198 -> 201<br>198 -> 202                                           | Singlet-A<br>0.27477<br>0.56288<br>-0.10385<br>0.27049                                  | 5.1668 eV | 239.96 nm | $f=0.0045$ | $\langle S^{**2} \rangle = 0.000$ |
| Excited State 11:<br>188 -> 199<br>198 -> 201<br>198 -> 202                                                         | Singlet-A<br>-0.12135<br>0.58633<br>0.33825                                             | 5.1975 eV | 238.55 nm | $f=0.0079$ | $\langle S^{**2} \rangle = 0.000$ |
| Excited State 12:<br>186 -> 199<br>187 -> 199<br>188 -> 199<br>189 -> 199<br>198 -> 202<br>198 -> 206<br>198 -> 207 | Singlet-A<br>0.10085<br>0.19954<br>0.57386<br>0.13684<br>0.16101<br>0.15236<br>-0.11612 | 5.2543 eV | 235.97 nm | $f=0.0965$ | $\langle S^{**2} \rangle = 0.000$ |
| Excited State 13:<br>184 -> 199<br>187 -> 199<br>188 -> 199<br>189 -> 199<br>191 -> 199                             | Singlet-A<br>0.14098<br>0.55666<br>-0.30274<br>0.16389<br>-0.13942                      | 5.3061 eV | 233.66 nm | $f=0.0048$ | $\langle S^{**2} \rangle = 0.000$ |
| Excited State 14:<br>190 -> 199                                                                                     | Singlet-A<br>0.69913                                                                    | 5.3217 eV | 232.98 nm | $f=0.0002$ | $\langle S^{**2} \rangle = 0.000$ |
| Excited State 15:<br>187 -> 199<br>189 -> 199                                                                       | Singlet-A<br>-0.24232<br>0.58129                                                        | 5.3454 eV | 231.95 nm | $f=0.0041$ | $\langle S^{**2} \rangle = 0.000$ |

|                   |           |           |           |            |                                   |
|-------------------|-----------|-----------|-----------|------------|-----------------------------------|
| 191 -> 199        | -0.29492  |           |           |            |                                   |
| Excited State 16: | Singlet-A | 5.4485 eV | 227.55 nm | $f=0.0007$ | $\langle S^{**2} \rangle = 0.000$ |
| 184 -> 199        | -0.25093  |           |           |            |                                   |
| 186 -> 199        | 0.12799   |           |           |            |                                   |
| 187 -> 200        | -0.10745  |           |           |            |                                   |
| 188 -> 200        | 0.13778   |           |           |            |                                   |
| 192 -> 202        | 0.13736   |           |           |            |                                   |
| 193 -> 200        | 0.14927   |           |           |            |                                   |
| 195 -> 200        | 0.51800   |           |           |            |                                   |
| 197 -> 202        | -0.10551  |           |           |            |                                   |
| Excited State 17: | Singlet-A | 5.4607 eV | 227.05 nm | $f=0.0131$ | $\langle S^{**2} \rangle = 0.000$ |
| 184 -> 199        | 0.11410   |           |           |            |                                   |
| 192 -> 202        | 0.11099   |           |           |            |                                   |
| 197 -> 202        | -0.19429  |           |           |            |                                   |
| 197 -> 203        | 0.57960   |           |           |            |                                   |
| 197 -> 204        | 0.24757   |           |           |            |                                   |
| Excited State 18: | Singlet-A | 5.4679 eV | 226.75 nm | $f=0.0013$ | $\langle S^{**2} \rangle = 0.000$ |
| 181 -> 199        | -0.14724  |           |           |            |                                   |
| 183 -> 199        | 0.12561   |           |           |            |                                   |
| 184 -> 199        | 0.47957   |           |           |            |                                   |
| 186 -> 199        | -0.18862  |           |           |            |                                   |
| 192 -> 202        | 0.17440   |           |           |            |                                   |
| 195 -> 200        | 0.22075   |           |           |            |                                   |
| 197 -> 202        | -0.12859  |           |           |            |                                   |
| 197 -> 203        | -0.19015  |           |           |            |                                   |
| Excited State 19: | Singlet-A | 5.4771 eV | 226.37 nm | $f=0.0004$ | $\langle S^{**2} \rangle = 0.000$ |
| 184 -> 199        | 0.16236   |           |           |            |                                   |
| 192 -> 202        | -0.36330  |           |           |            |                                   |
| 195 -> 200        | 0.25832   |           |           |            |                                   |
| 197 -> 200        | 0.17572   |           |           |            |                                   |
| 197 -> 202        | 0.34386   |           |           |            |                                   |
| 197 -> 203        | 0.19670   |           |           |            |                                   |
| Excited State 20: | Singlet-A | 5.5179 eV | 224.69 nm | $f=0.0028$ | $\langle S^{**2} \rangle = 0.000$ |
| 198 -> 203        | 0.56548   |           |           |            |                                   |
| 198 -> 204        | -0.21526  |           |           |            |                                   |
| 198 -> 205        | -0.31388  |           |           |            |                                   |
| Excited State 21: | Singlet-A | 5.5447 eV | 223.61 nm | $f=0.0002$ | $\langle S^{**2} \rangle = 0.000$ |
| 192 -> 201        | -0.10275  |           |           |            |                                   |
| 192 -> 202        | 0.42249   |           |           |            |                                   |
| 195 -> 202        | 0.10143   |           |           |            |                                   |
| 197 -> 200        | 0.33878   |           |           |            |                                   |
| 197 -> 201        | -0.10036  |           |           |            |                                   |
| 197 -> 202        | 0.35234   |           |           |            |                                   |
| Excited State 22: | Singlet-A | 5.5563 eV | 223.14 nm | $f=0.0025$ | $\langle S^{**2} \rangle = 0.000$ |
| 198 -> 203        | 0.32964   |           |           |            |                                   |
| 198 -> 204        | 0.58612   |           |           |            |                                   |
| 198 -> 205        | 0.17077   |           |           |            |                                   |
| Excited State 23: | Singlet-A | 5.5737 eV | 222.45 nm | $f=0.0005$ | $\langle S^{**2} \rangle = 0.000$ |
| 189 -> 201        | -0.35061  |           |           |            |                                   |



|                   |           |           |           |            |                                  |
|-------------------|-----------|-----------|-----------|------------|----------------------------------|
| 191 -> 201        | -0.24806  |           |           |            |                                  |
| 196 -> 201        | 0.50666   |           |           |            |                                  |
| 198 -> 205        | -0.12425  |           |           |            |                                  |
| Excited State 24: | Singlet-A | 5.5792 eV | 222.23 nm | $f=0.0013$ | $\langle S^{*2} \rangle = 0.000$ |
| 186 -> 199        | -0.12376  |           |           |            |                                  |
| 196 -> 201        | 0.12573   |           |           |            |                                  |
| 198 -> 203        | 0.20963   |           |           |            |                                  |
| 198 -> 204        | -0.27244  |           |           |            |                                  |
| 198 -> 205        | 0.55323   |           |           |            |                                  |
| Excited State 25: | Singlet-A | 5.5858 eV | 221.96 nm | $f=0.0115$ | $\langle S^{*2} \rangle = 0.000$ |
| 184 -> 199        | 0.23522   |           |           |            |                                  |
| 186 -> 199        | 0.60003   |           |           |            |                                  |
| 187 -> 199        | -0.14088  |           |           |            |                                  |
| 198 -> 204        | -0.10262  |           |           |            |                                  |
| Excited State 26: | Singlet-A | 5.6329 eV | 220.11 nm | $f=0.0016$ | $\langle S^{*2} \rangle = 0.000$ |
| 187 -> 200        | -0.25399  |           |           |            |                                  |
| 188 -> 200        | 0.30153   |           |           |            |                                  |
| 195 -> 200        | -0.10057  |           |           |            |                                  |
| 197 -> 200        | 0.44059   |           |           |            |                                  |
| 197 -> 201        | 0.10333   |           |           |            |                                  |
| 197 -> 202        | -0.28292  |           |           |            |                                  |
| Excited State 27: | Singlet-A | 5.6363 eV | 219.97 nm | $f=0.0184$ | $\langle S^{*2} \rangle = 0.000$ |
| 196 -> 202        | 0.13127   |           |           |            |                                  |
| 196 -> 203        | -0.25152  |           |           |            |                                  |
| 196 -> 204        | 0.60134   |           |           |            |                                  |
| 196 -> 209        | -0.15685  |           |           |            |                                  |
| Excited State 28: | Singlet-A | 5.6380 eV | 219.91 nm | $f=0.0016$ | $\langle S^{*2} \rangle = 0.000$ |
| 187 -> 200        | 0.28798   |           |           |            |                                  |
| 188 -> 200        | -0.34087  |           |           |            |                                  |
| 195 -> 200        | 0.14601   |           |           |            |                                  |
| 197 -> 200        | 0.36641   |           |           |            |                                  |
| 197 -> 202        | -0.24071  |           |           |            |                                  |
| Excited State 29: | Singlet-A | 5.6410 eV | 219.79 nm | $f=0.0020$ | $\langle S^{*2} \rangle = 0.000$ |
| 189 -> 201        | 0.39863   |           |           |            |                                  |
| 191 -> 201        | 0.28122   |           |           |            |                                  |
| 196 -> 201        | 0.45209   |           |           |            |                                  |
| 196 -> 204        | -0.10697  |           |           |            |                                  |
| Excited State 30: | Singlet-A | 5.6824 eV | 218.19 nm | $f=0.0368$ | $\langle S^{*2} \rangle = 0.000$ |
| 181 -> 199        | -0.31026  |           |           |            |                                  |
| 183 -> 199        | 0.14581   |           |           |            |                                  |
| 184 -> 199        | -0.15183  |           |           |            |                                  |
| 195 -> 202        | -0.12165  |           |           |            |                                  |
| 198 -> 206        | 0.37293   |           |           |            |                                  |
| 198 -> 207        | -0.26117  |           |           |            |                                  |

SavETr: write IOETrn= 770 NScale= 10 NData= 16 NLR=1 NState= 30 LETran= 550.  
 \*\*\*\*\*

#### 4. HRESIMS, IR, $[\alpha]_D$ , ECD and NMR spectra of compound 1

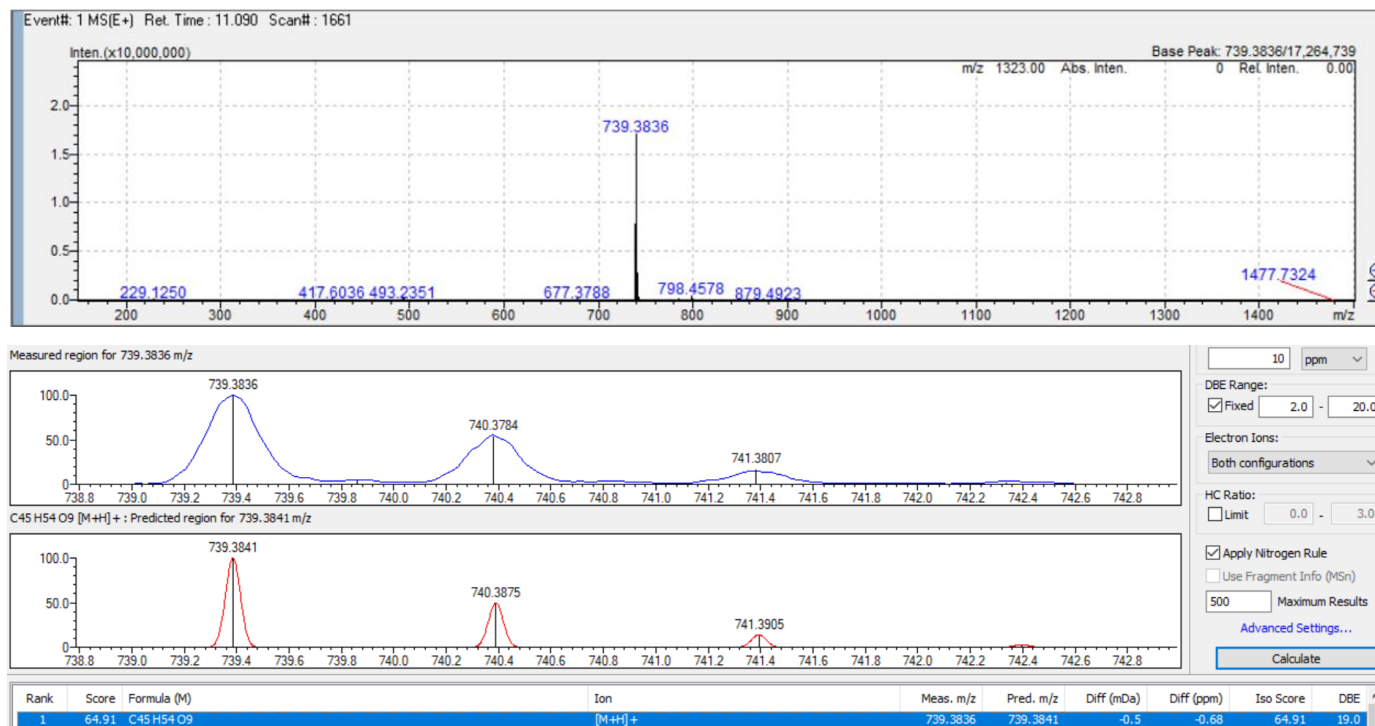

Figure S3. HRESIMS spectrum of artematrotrimer A (**1**).

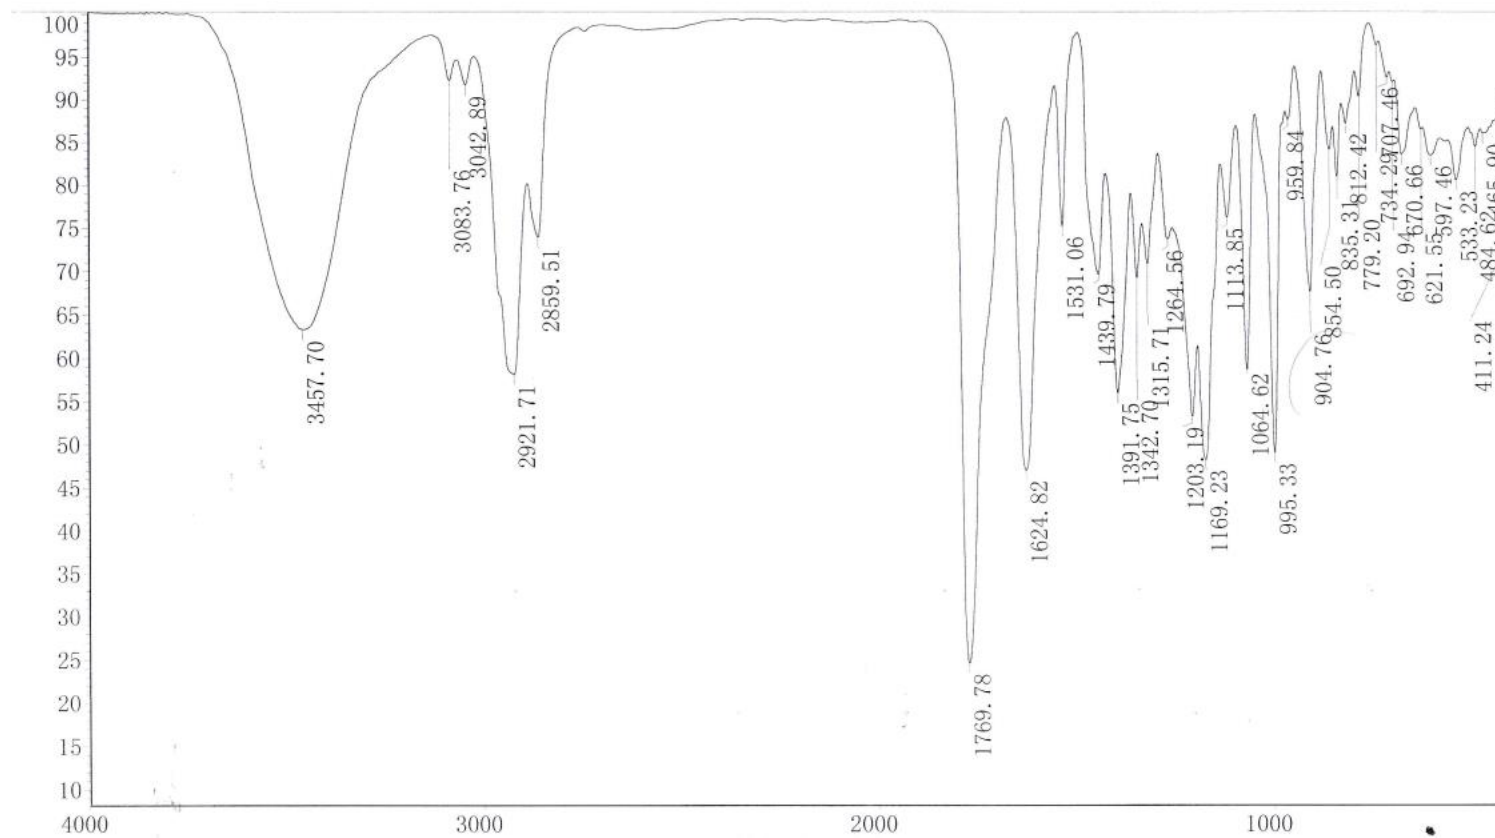

Figure S4. IR spectrum of artematrotrimer A (**1**).

### **Rudolph Research Analytical**

This sample was measured on an Autopol VI, Serial #91058  
Manufactured by Rudolph Research Analytical, Hackettstown, NJ, USA.

Measurement Date : Wednesday, 30-SEP-2020

Set Temperature : OFF

Time Delay : Disabled

Delay between Measurement : Disabled

| <b><u>n</u></b>    | <b><u>Average</u></b>   | <b><u>Std.Dev.</u></b> | <b><u>% RSD</u></b>  | <b><u>Maximum</u></b> | <b><u>Minimum</u></b> |                      |                     |                            |                     |
|--------------------|-------------------------|------------------------|----------------------|-----------------------|-----------------------|----------------------|---------------------|----------------------------|---------------------|
| 5                  | -38.27                  | 0.85                   | -2.22                | -37.27                | -39.55                |                      |                     |                            |                     |
| <b><u>S.No</u></b> | <b><u>Sample ID</u></b> | <b><u>Time</u></b>     | <b><u>Result</u></b> | <b><u>Scale</u></b>   | <b><u>OR °Arc</u></b> | <b><u>WLG.nm</u></b> | <b><u>Lg.mm</u></b> | <b><u>Conc.g/100ml</u></b> | <b><u>Temp.</u></b> |
| 1                  | JAR129A                 | 10:20:34 AM            | -37.27               | SR                    | -0.0328               | 589                  | 100.00              | 0.088                      | 23.1                |
| 2                  | JAR129A                 | 10:20:42 AM            | -38.18               | SR                    | -0.0336               | 589                  | 100.00              | 0.088                      | 23.1                |
| 3                  | JAR129A                 | 10:20:51 AM            | -37.84               | SR                    | -0.0333               | 589                  | 100.00              | 0.088                      | 23.1                |
| 4                  | JAR129A                 | 10:20:58 AM            | -38.52               | SR                    | -0.0339               | 589                  | 100.00              | 0.088                      | 23.1                |
| 5                  | JAR129A                 | 10:21:07 AM            | -39.55               | SR                    | -0.0348               | 589                  | 100.00              | 0.088                      | 23.1                |

Figure S5. Optical rotation spectrum of artematrotrimer A (1).

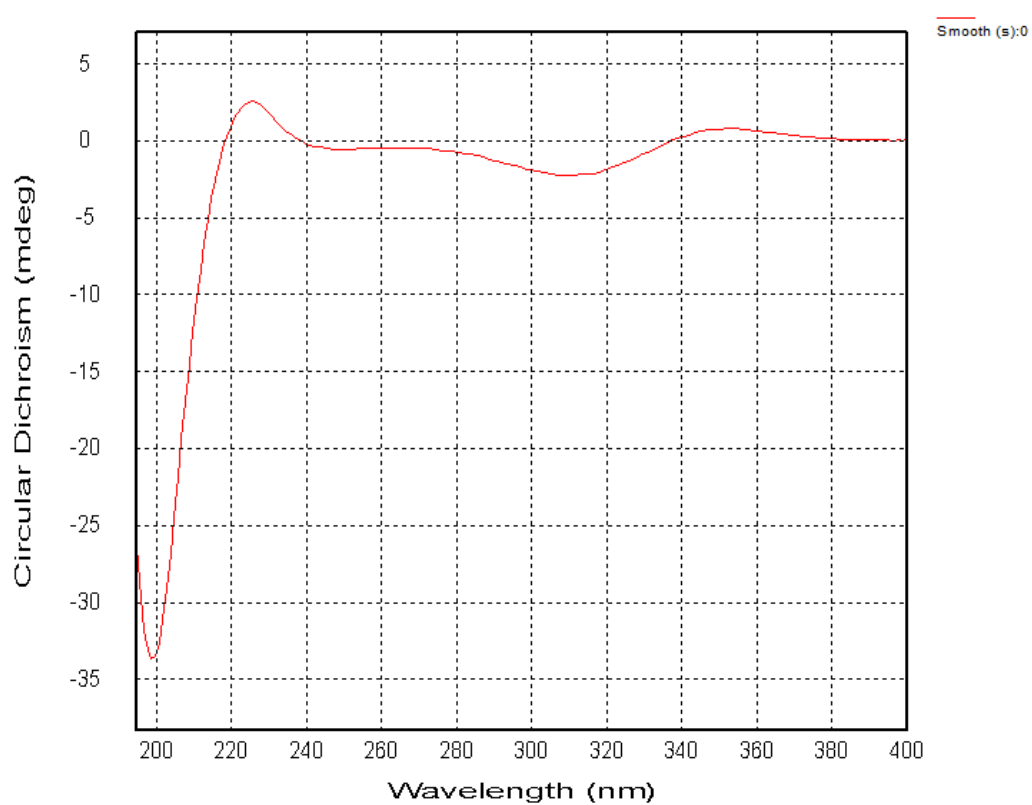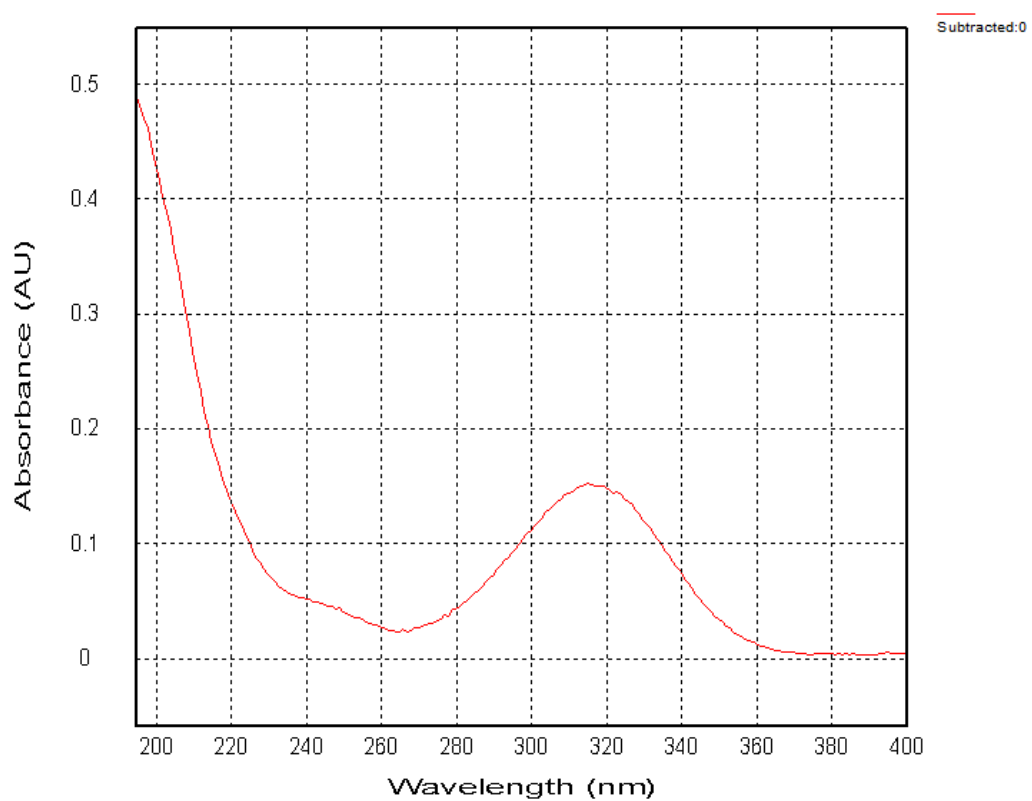

Figure S6. ECD (top) and UV (bottom) spectra of artematrotrimer A (1).

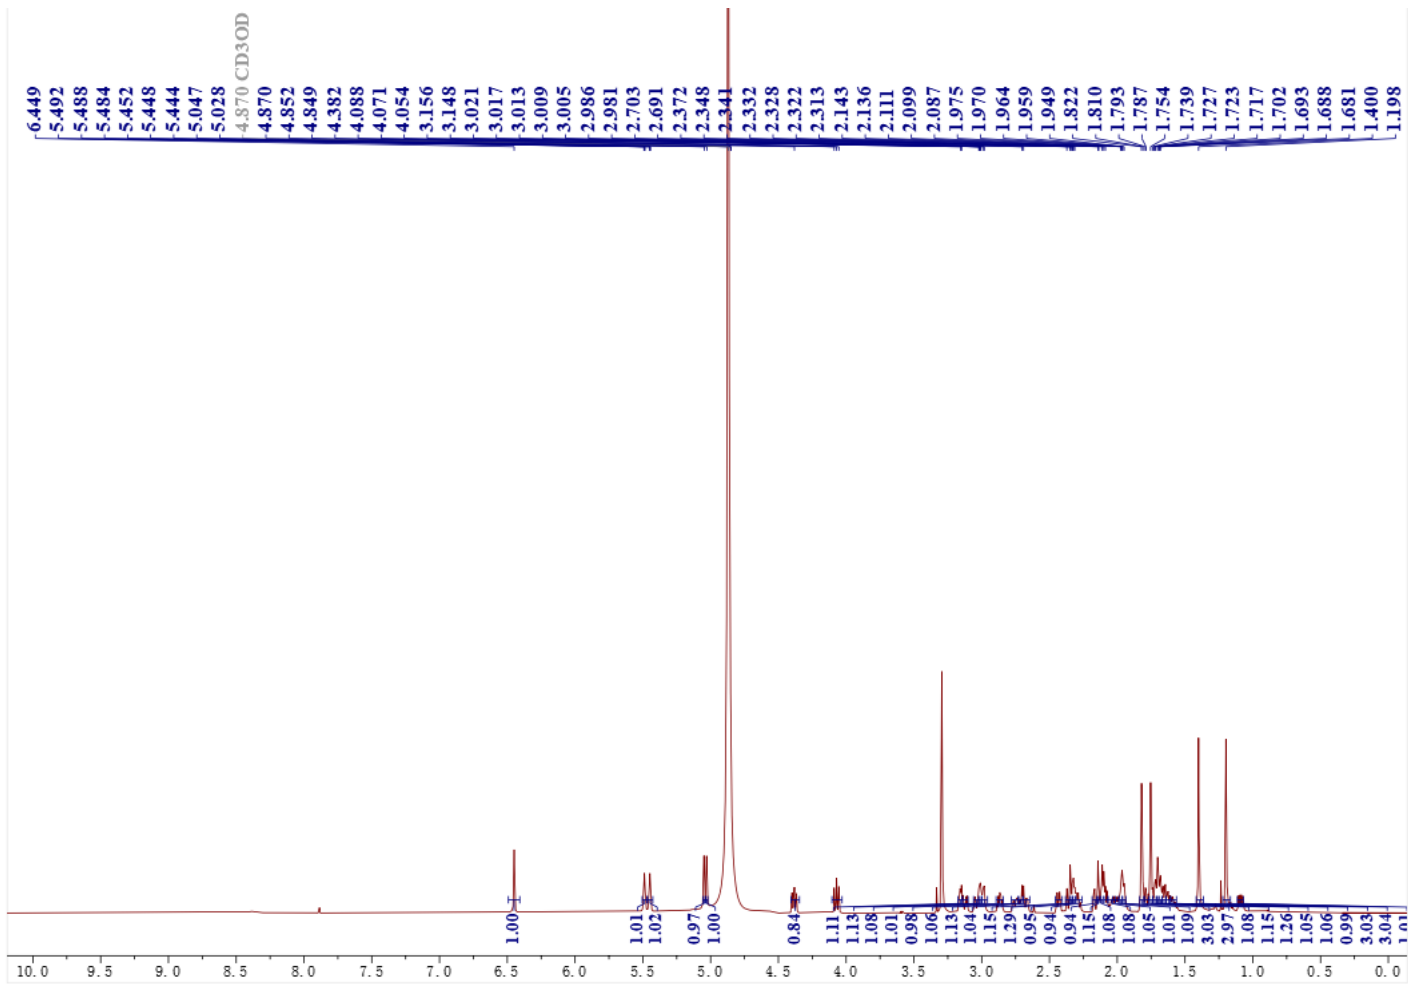

Figure S7.  $^1\text{H}$  spectrum (600 MHz) of artematrotimer A (**1**) in  $\text{CD}_3\text{OD}$ .

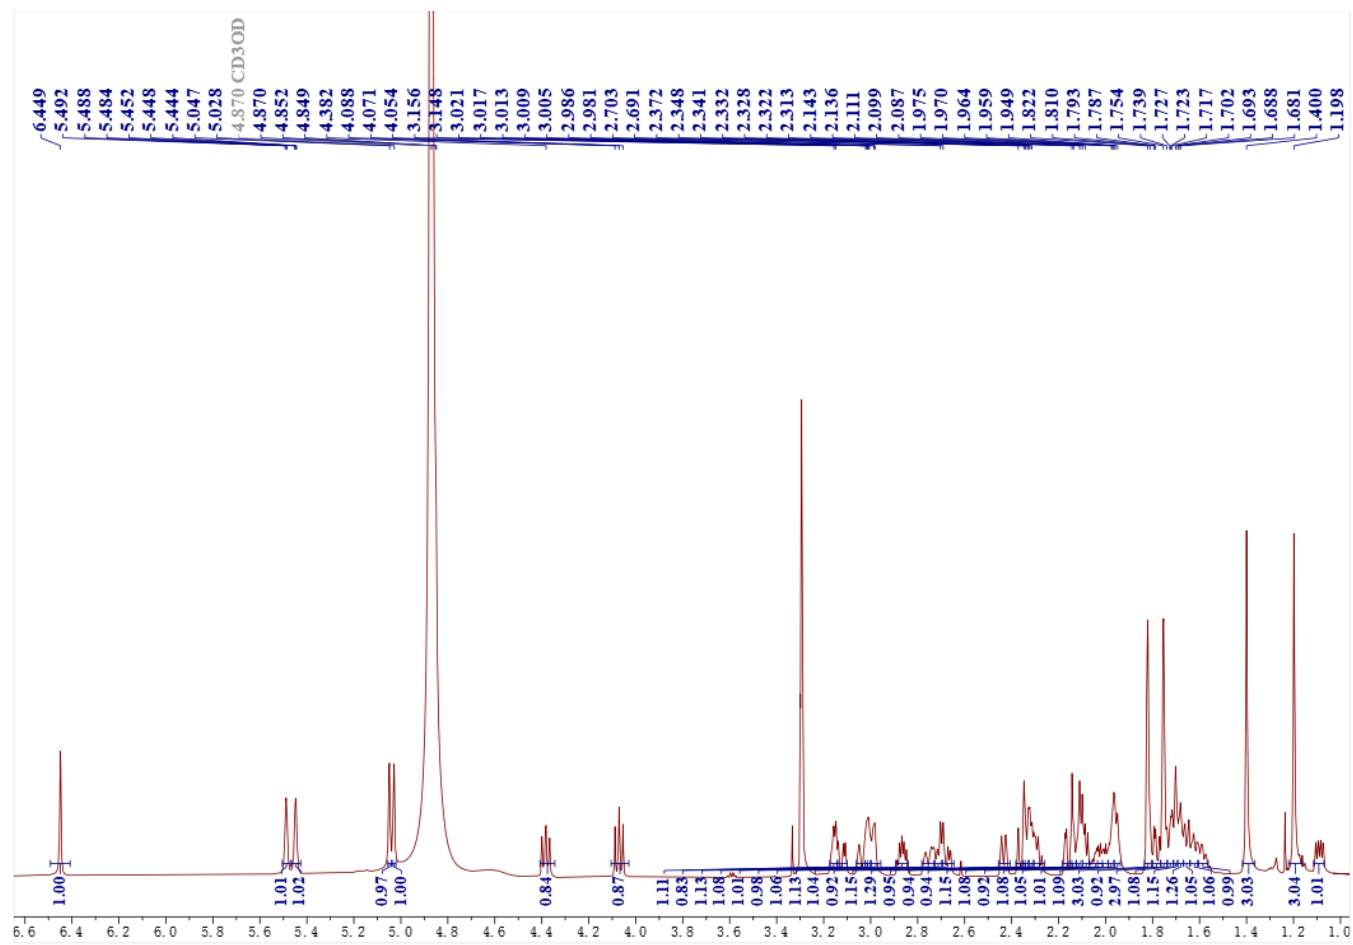

Figure S8. enlarged  $^1\text{H}$  spectrum (600 MHz) of artematrotrimer A (**1**) in  $\text{CD}_3\text{OD}$ .

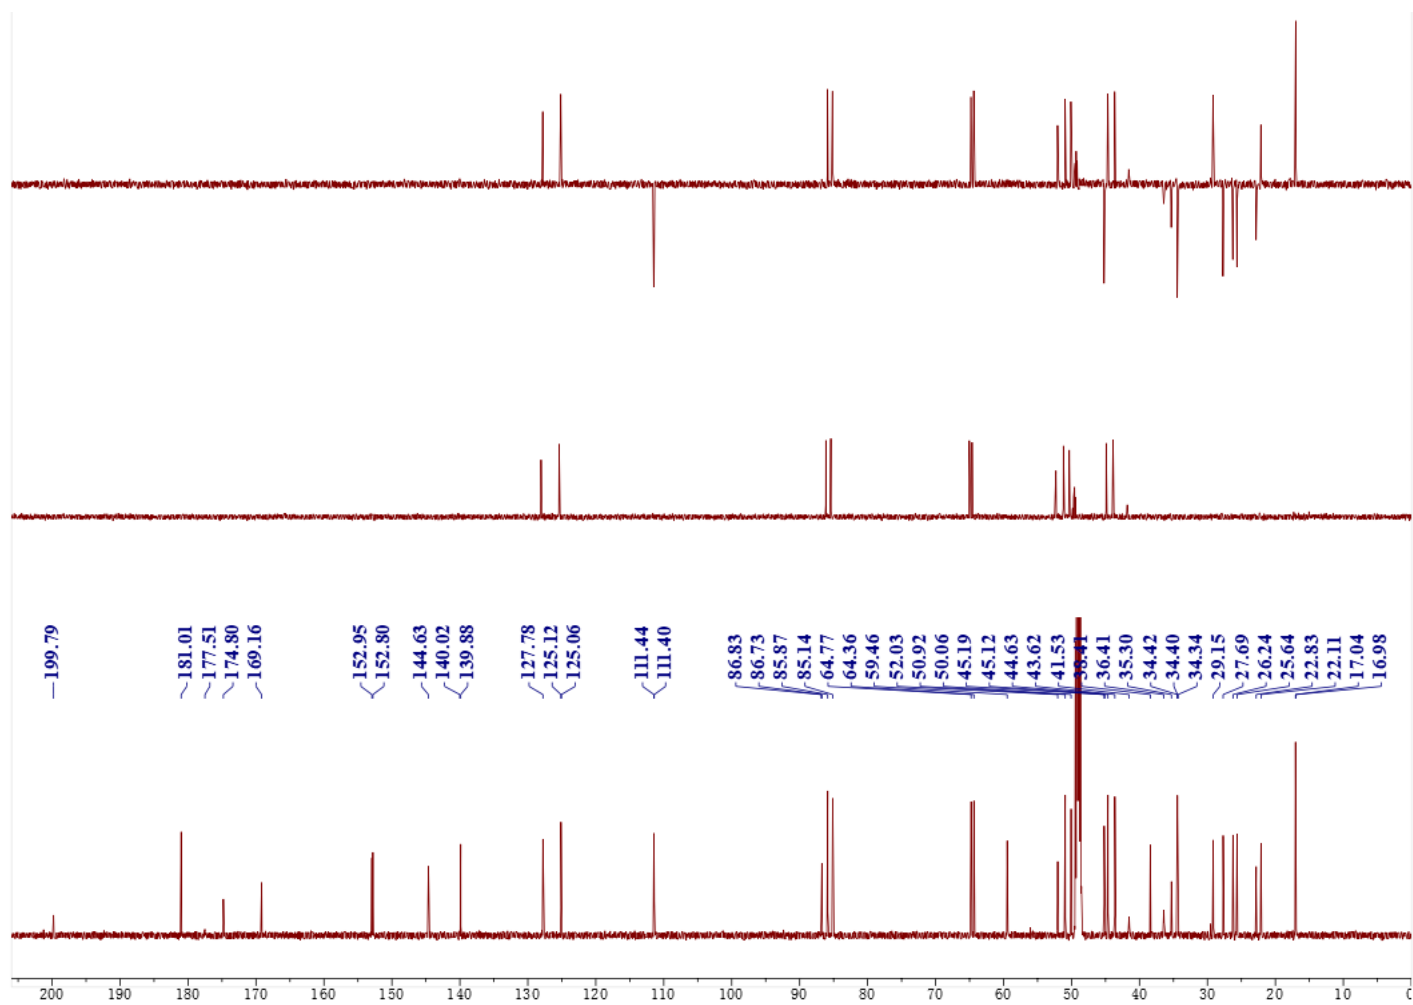

Figure S9.  $^{13}\text{C}$  and DEPT spectra (150 MHz) of artematotrimer A (**1**) in  $\text{CD}_3\text{OD}$ .



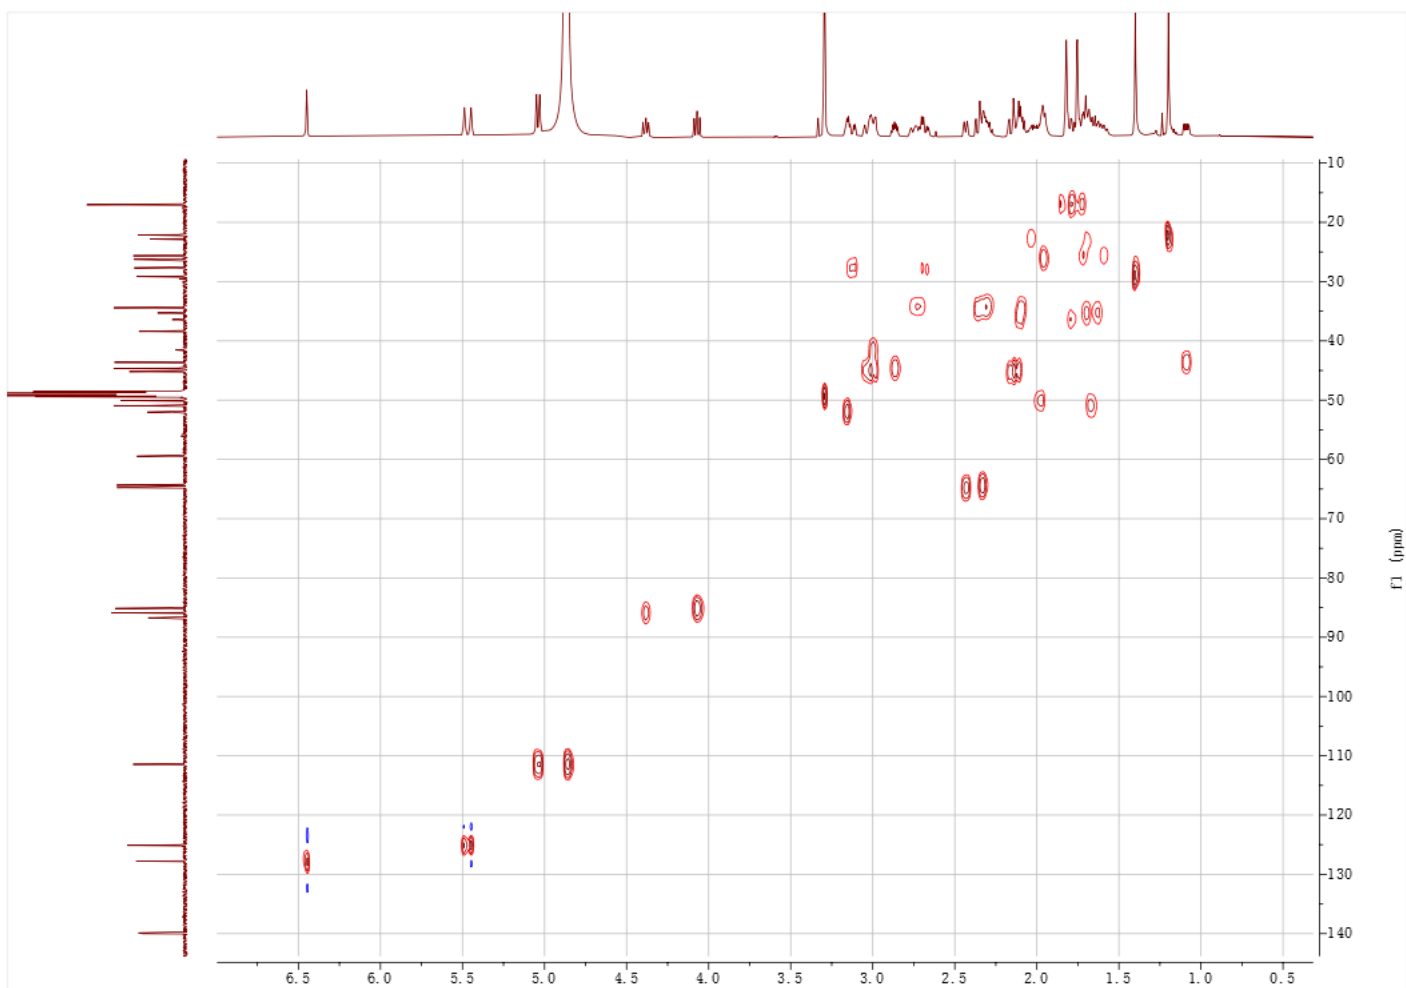

Figure S10. HSQC spectrum (600 MHz) of artematrotimer A (**1**) in CD<sub>3</sub>OD.

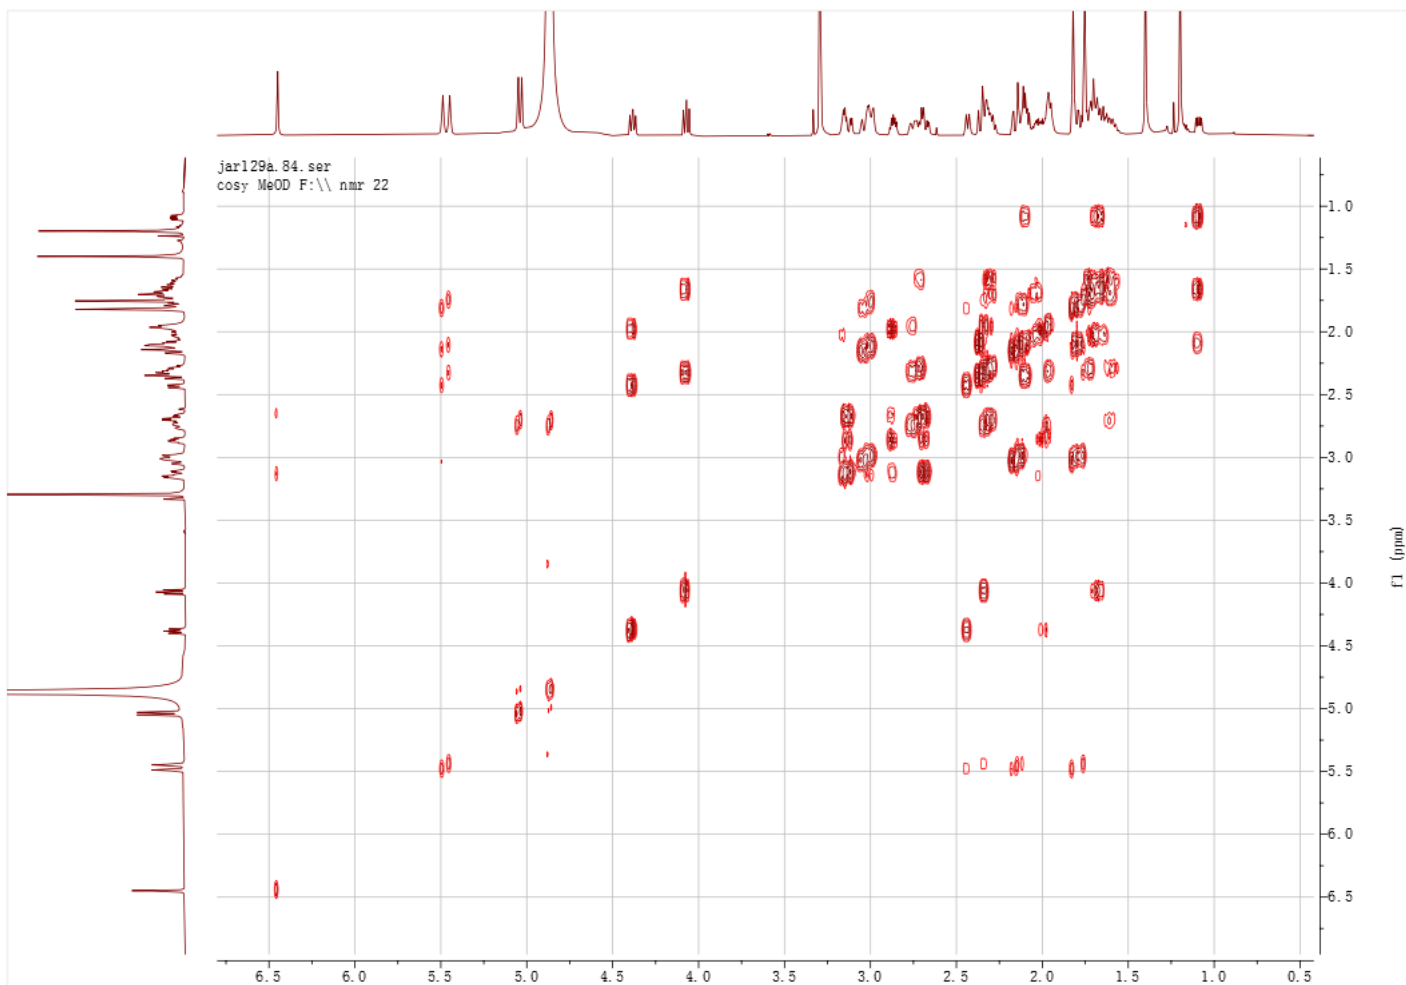

Figure S11.  $^1\text{H}$ - $^1\text{H}$  COSY spectrum (600 MHz) of artematotrimer A (**1**) in  $\text{CD}_3\text{OD}$ .

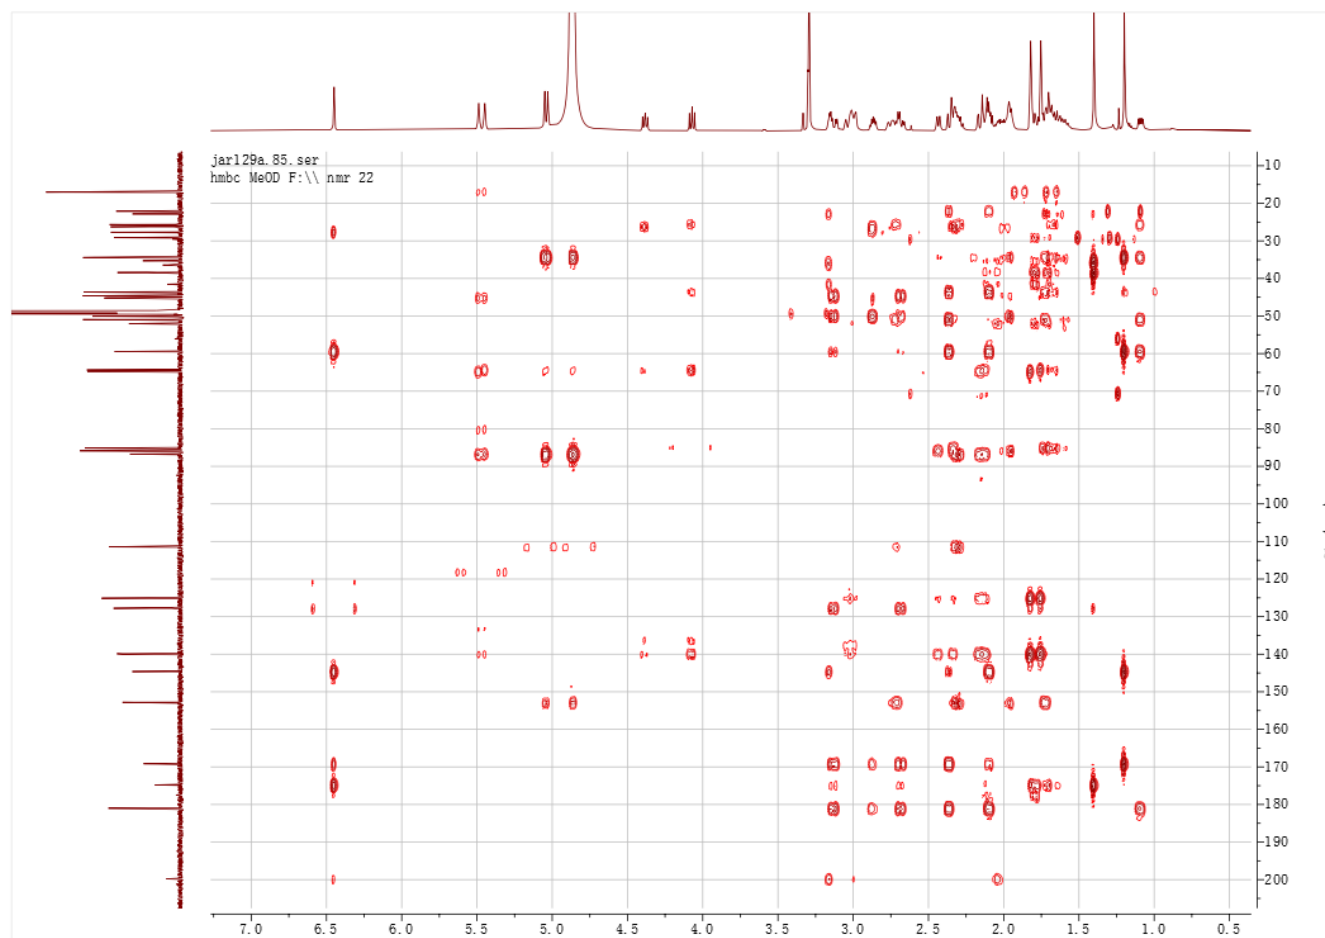

Figure S12. HMBC spectrum (600 MHz) of artematrotimer A (**1**) in CD<sub>3</sub>OD.

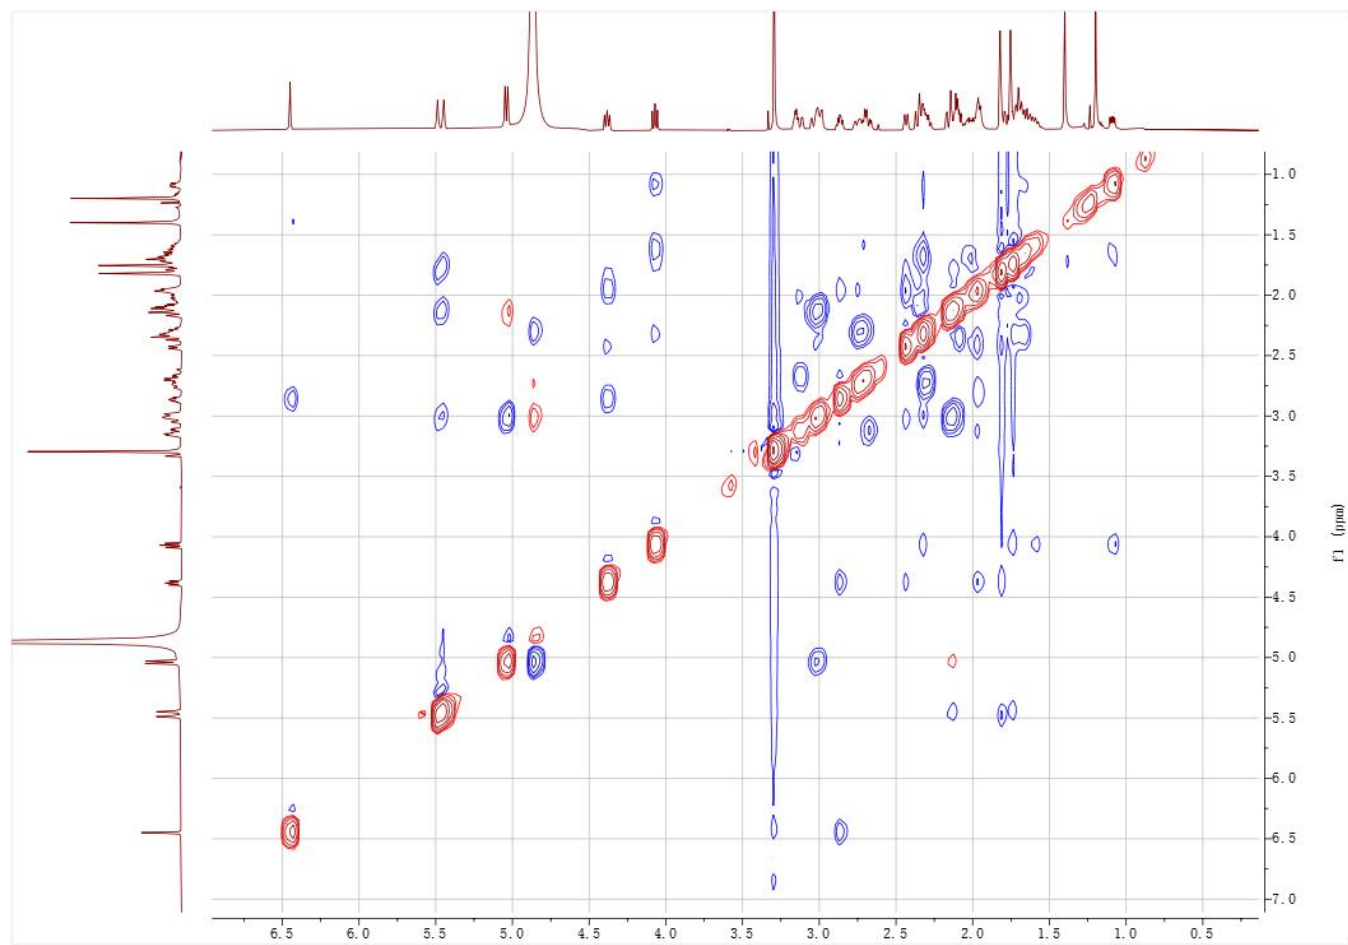

Figure S13. ROESY spectrum (600 MHz) of artematrotrimer A (**1**) in CD<sub>3</sub>OD.

## 5. HRESIMS, IR, $[\alpha]_D$ , ECD and NMR spectra of compound 2

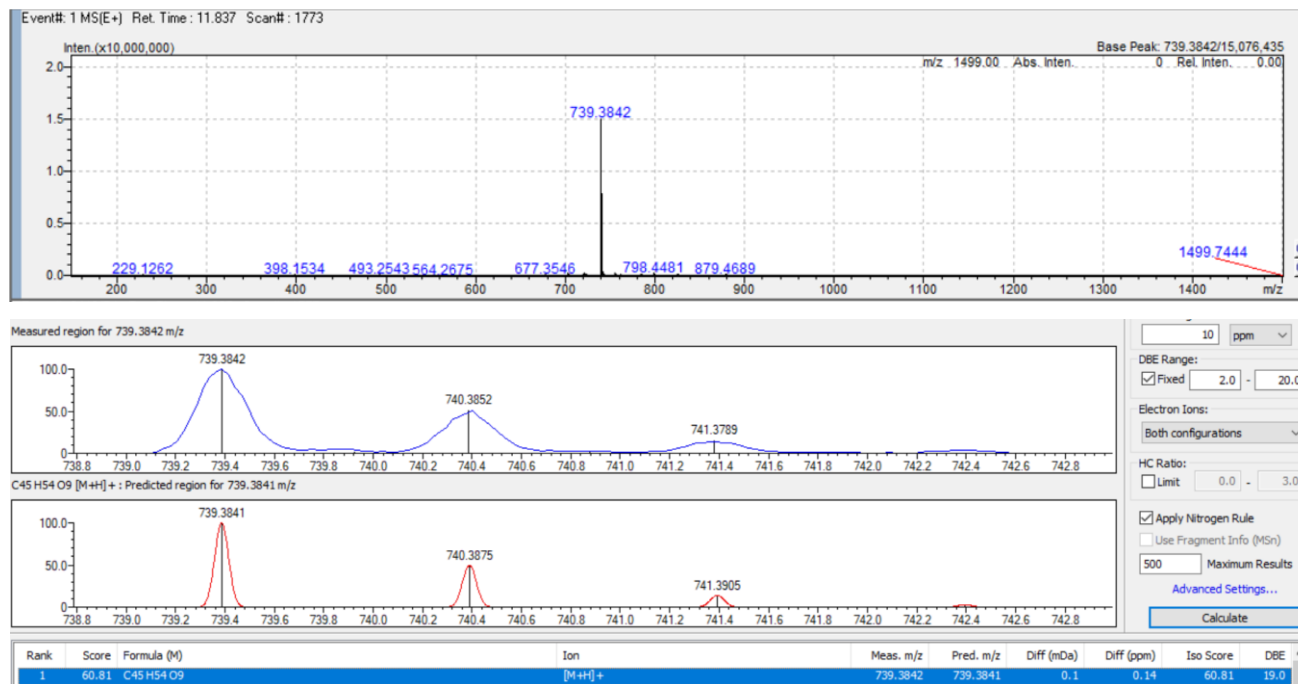

Figure S14. HRESIMS spectrum of artematrotrimer B (2).

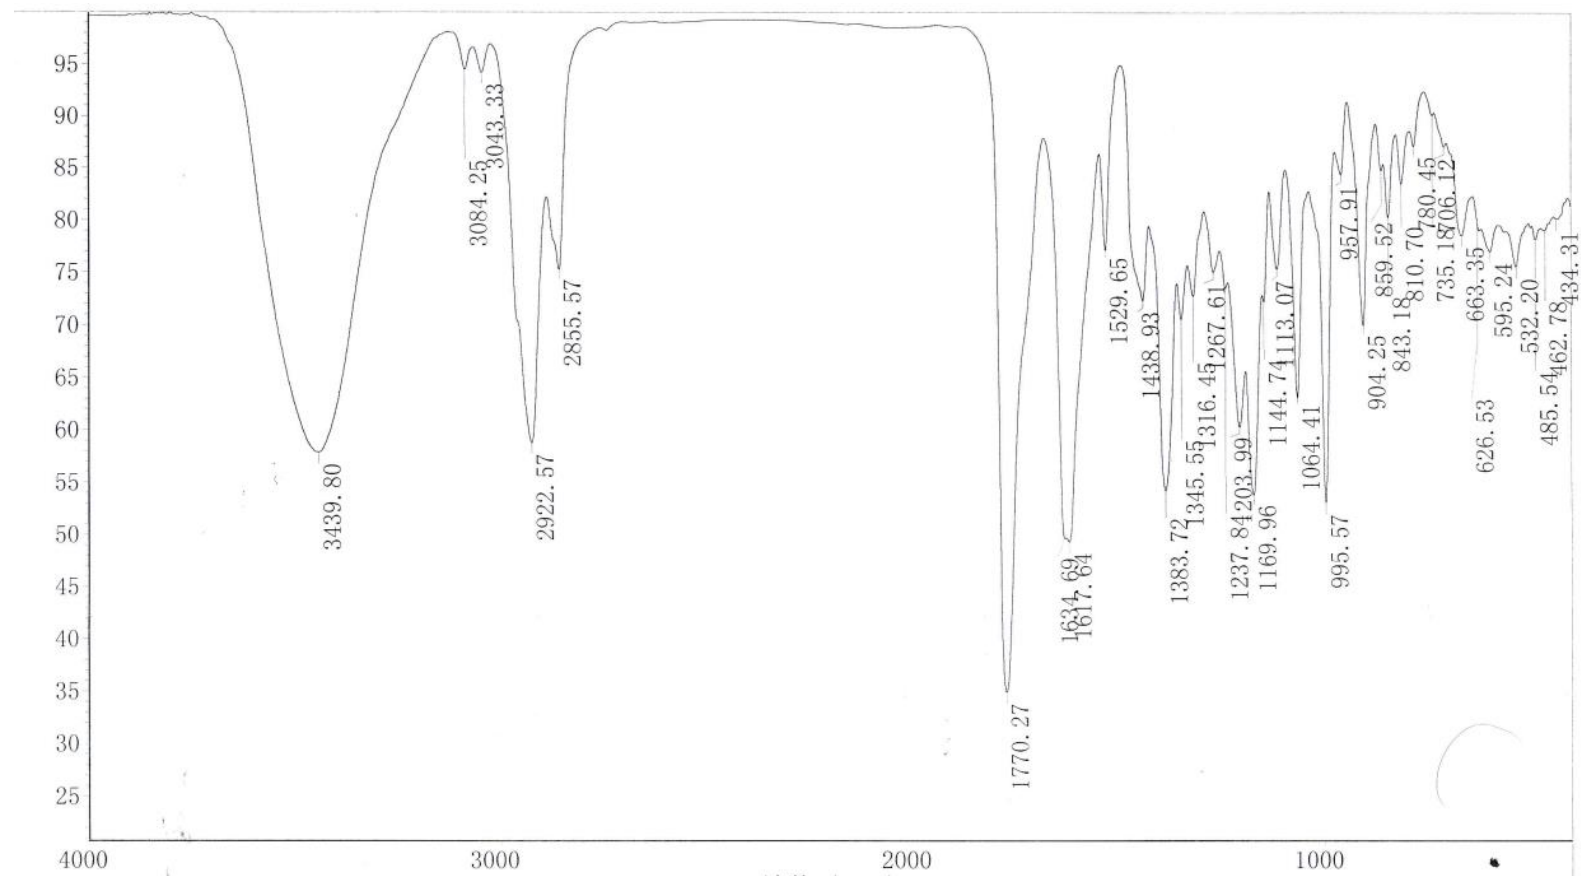

Figure S15. IR spectrum of artematrotrimer B (2).

### **Rudolph Research Analytical**

This sample was measured on an Autopol VI, Serial #91058  
Manufactured by Rudolph Research Analytical, Hackettstown, NJ, USA.

Measurement Date : Wednesday, 30-SEP-2020

Set Temperature : OFF

Time Delay : Disabled

Delay between Measurement : Disabled

| <b><u>n</u></b>    | <b><u>Average</u></b>   | <b><u>Std.Dev.</u></b> | <b><u>% RSD</u></b>  | <b><u>Maximum</u></b> | <b><u>Minimum</u></b> |                      |                     |                            |                     |  |
|--------------------|-------------------------|------------------------|----------------------|-----------------------|-----------------------|----------------------|---------------------|----------------------------|---------------------|--|
| 5                  | -4.91                   | 0.29                   | -5.90                | -4.41                 | -5.08                 |                      |                     |                            |                     |  |
| <b><u>S.No</u></b> | <b><u>Sample ID</u></b> | <b><u>Time</u></b>     | <b><u>Result</u></b> | <b><u>Scale</u></b>   | <b><u>OR °Arc</u></b> | <b><u>WLG.nm</u></b> | <b><u>Lg.mm</u></b> | <b><u>Conc.g/100ml</u></b> | <b><u>Temp.</u></b> |  |
| 1                  | JAR129B                 | 10:35:33 AM            | -4.41                | SR                    | -0.0026               | 589                  | 100.00              | 0.059                      | 23.2                |  |
| 2                  | JAR129B                 | 10:35:41 AM            | -5.08                | SR                    | -0.0030               | 589                  | 100.00              | 0.059                      | 23.2                |  |
| 3                  | JAR129B                 | 10:35:49 AM            | -5.08                | SR                    | -0.0030               | 589                  | 100.00              | 0.059                      | 23.2                |  |
| 4                  | JAR129B                 | 10:35:57 AM            | -5.08                | SR                    | -0.0030               | 589                  | 100.00              | 0.059                      | 23.2                |  |
| 5                  | JAR129B                 | 10:36:05 AM            | -4.92                | SR                    | -0.0029               | 589                  | 100.00              | 0.059                      | 23.2                |  |

Figure S16. Optical rotation spectrum of artematrotrimer B (2).

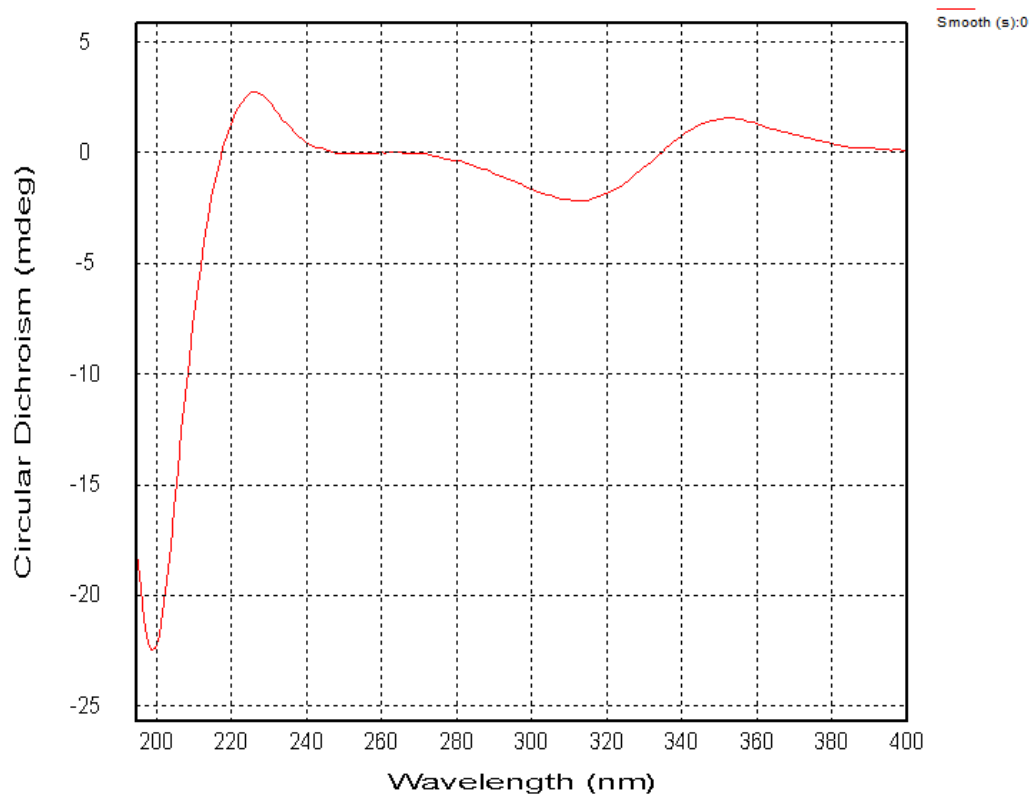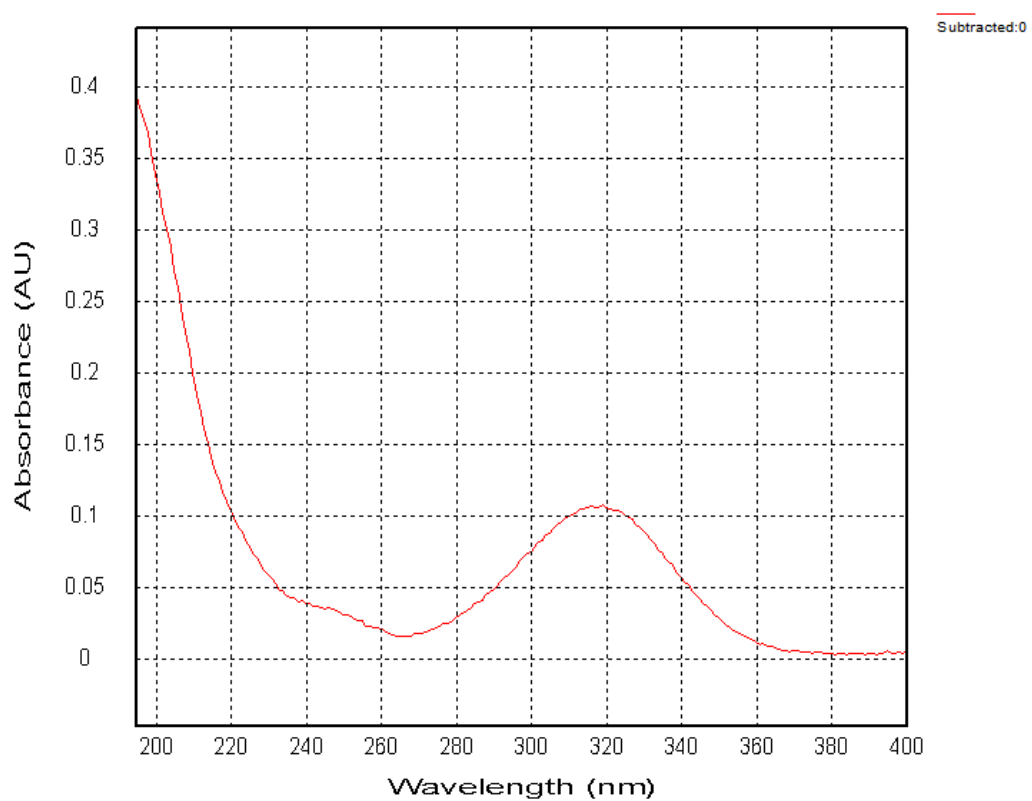

Figure S17. ECD (top) and UV (bottom) spectra of artematrotrimer B (**2**).



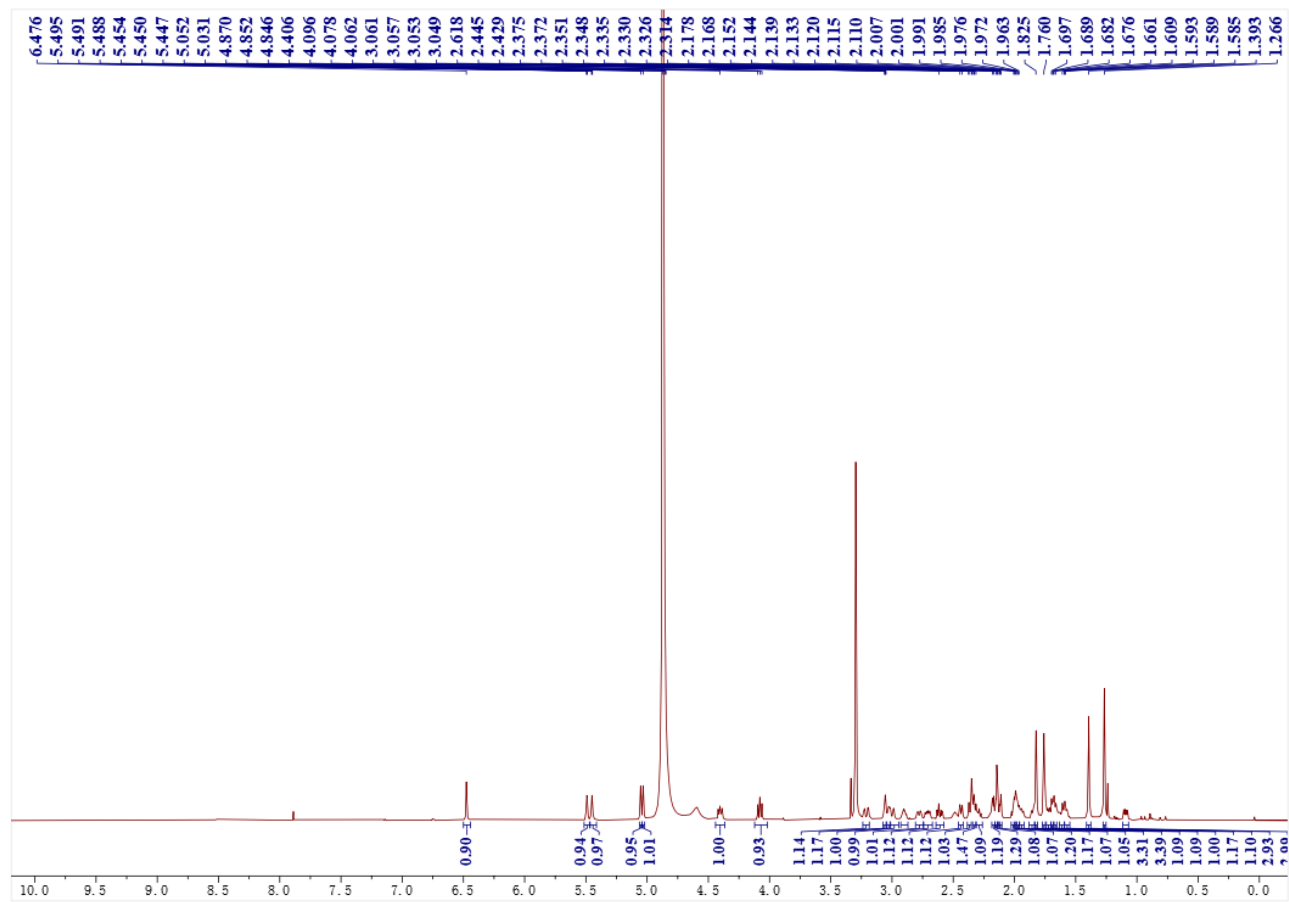

Figure S18.  $^1\text{H}$  spectrum (600 MHz) of artematrotrimer B (**2**) in  $\text{CD}_3\text{OD}$ .

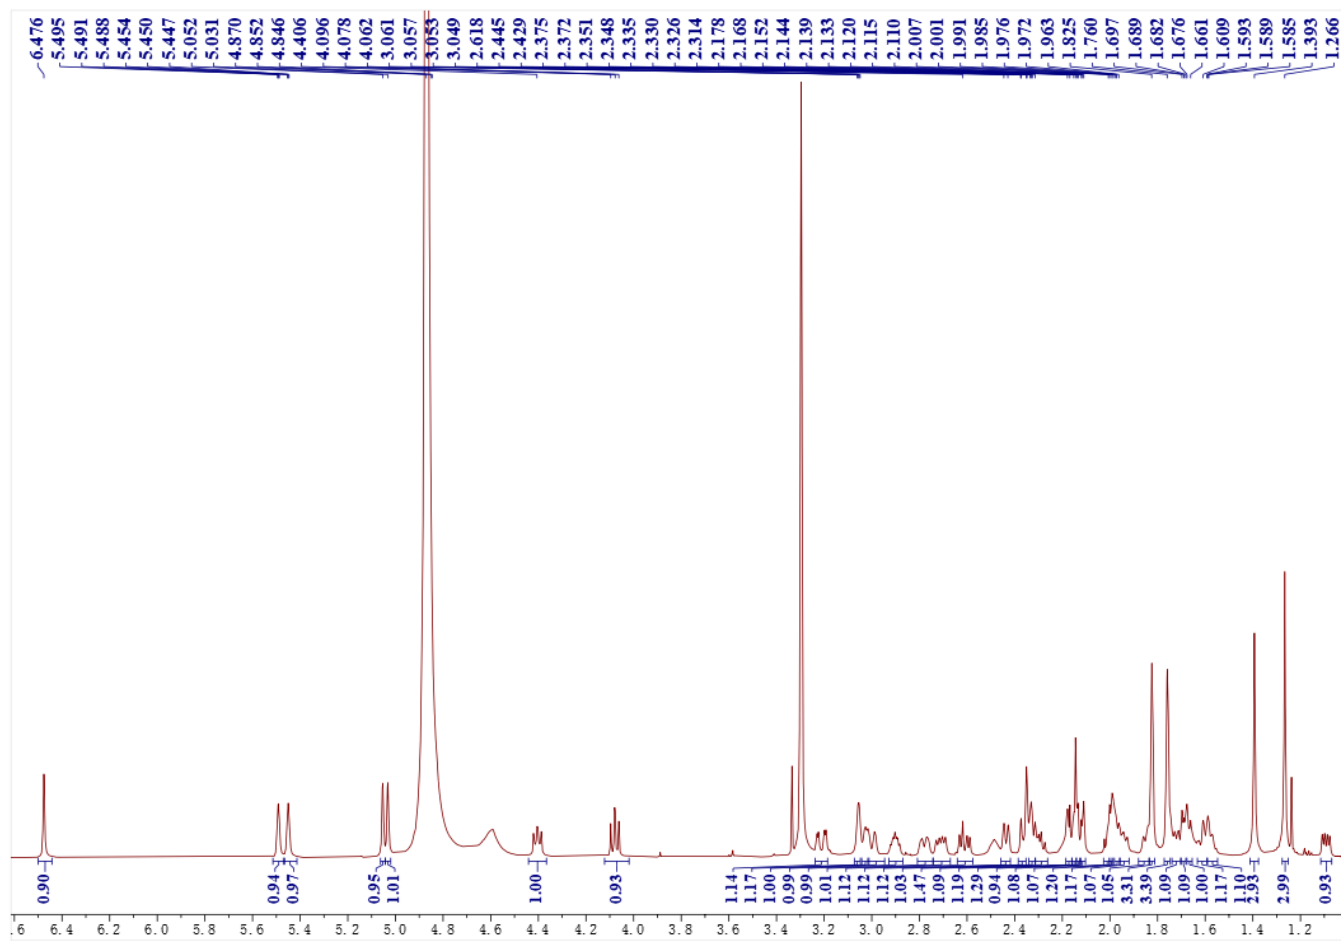

Figure S19. enlarged  $^1\text{H}$  spectrum (600 MHz) of artematrotimer B (**2**) in  $\text{CD}_3\text{OD}$ .

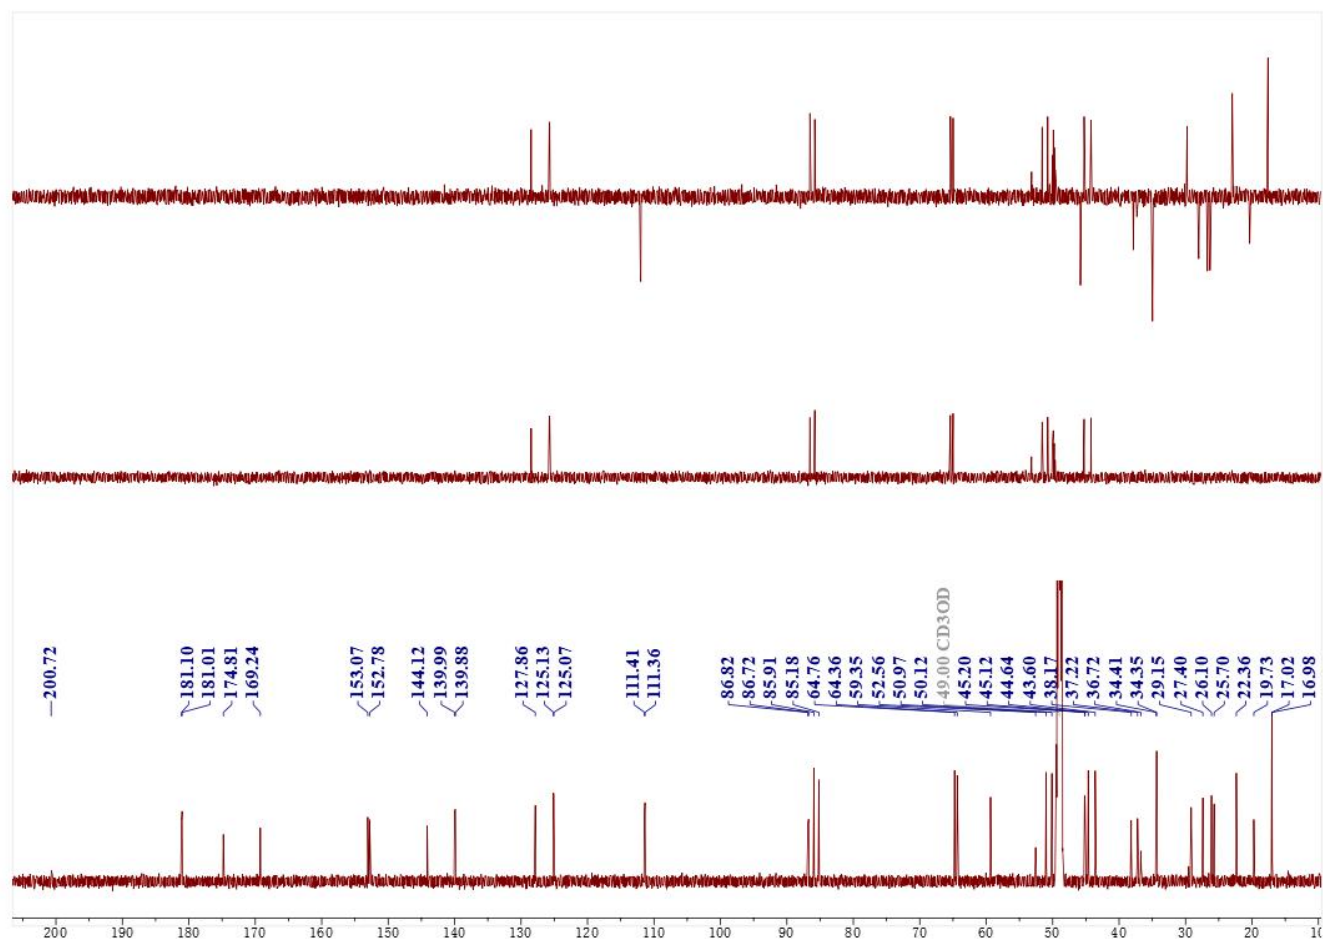

Figure S20. <sup>13</sup>C and DEPT spectra (150 MHz) of artematrotimer B (**2**) in CD<sub>3</sub>OD.

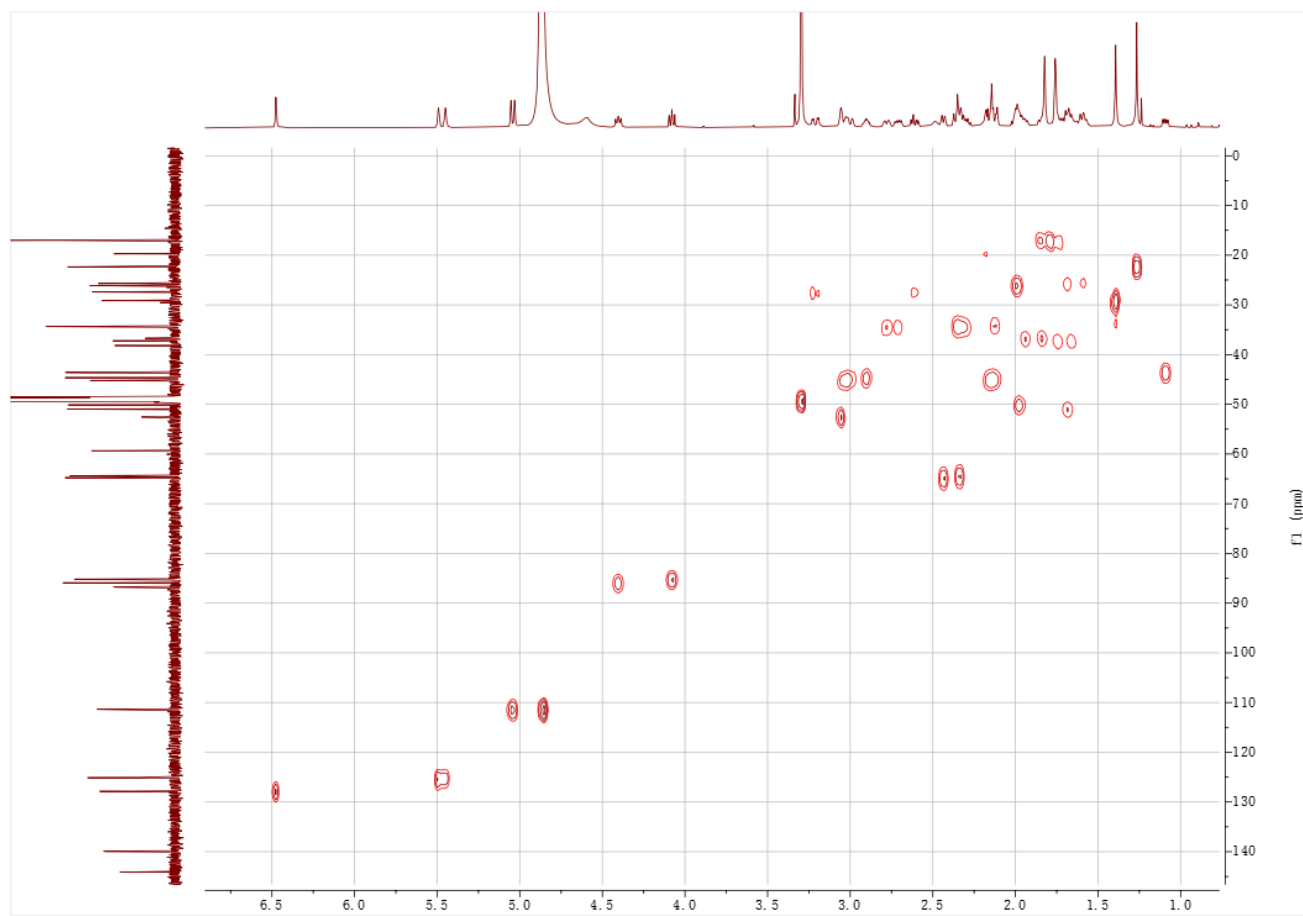

Figure S21. HSQC spectrum (600 MHz) of artematrotrimer B (**2**) in  $\text{CD}_3\text{OD}$ .

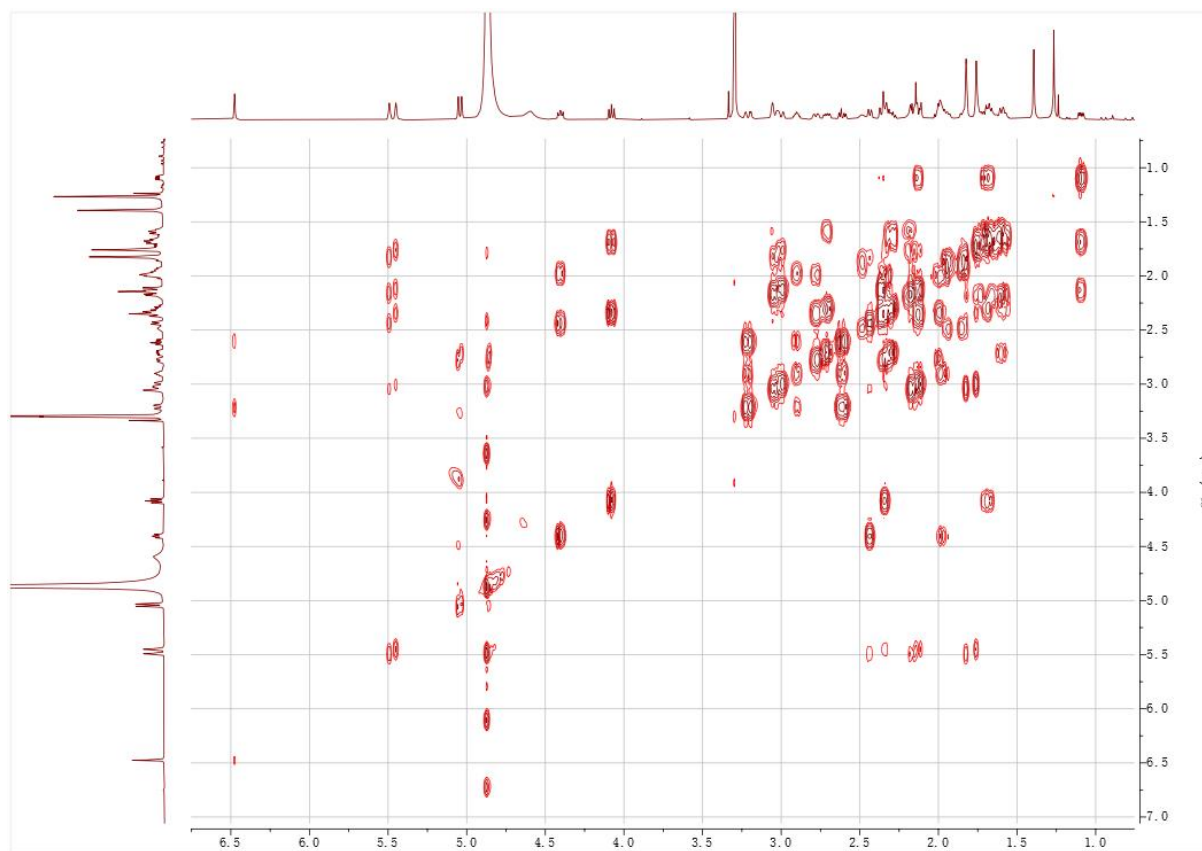

Figure S22.  $^1\text{H}$ - $^1\text{H}$  COSY spectrum (600 MHz) of artematrotrimer B (**2**) in  $\text{CD}_3\text{OD}$ .

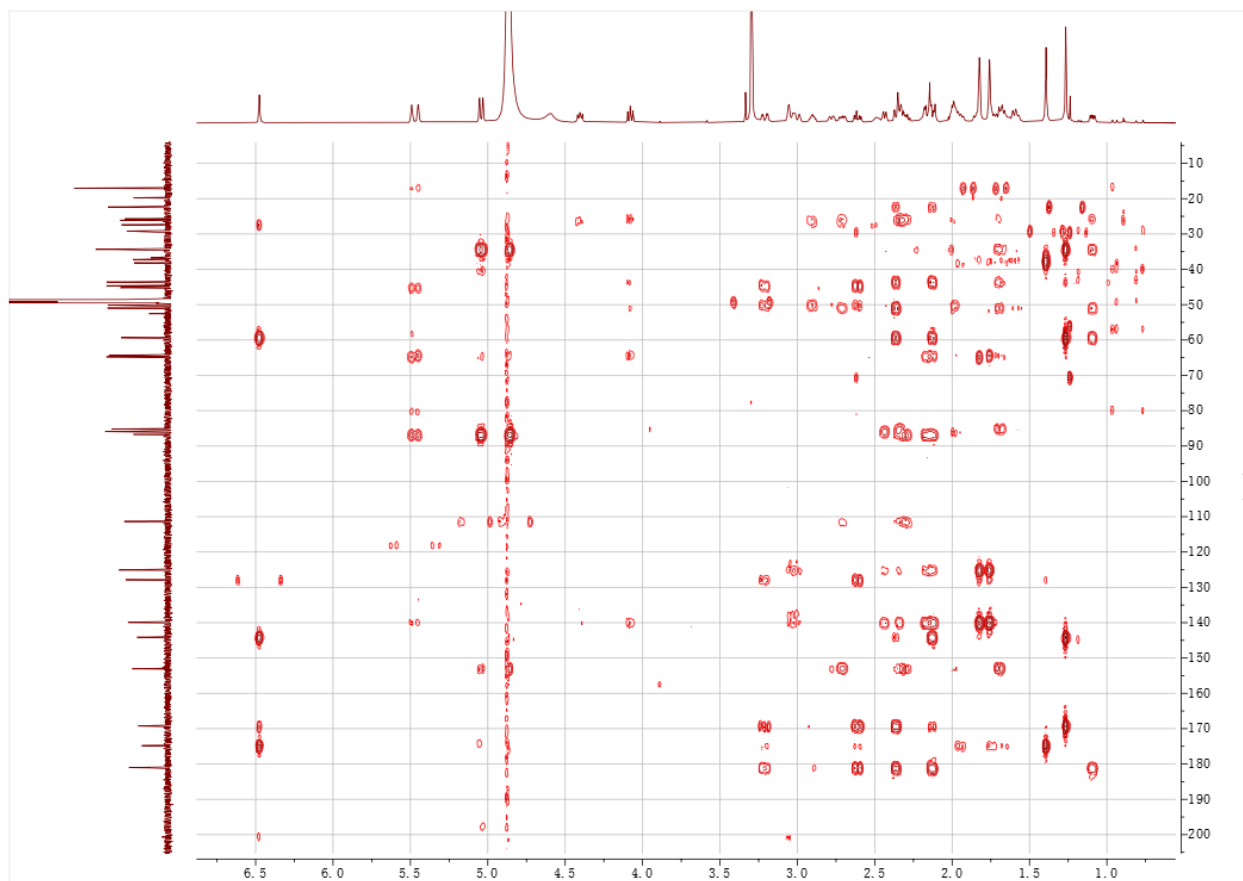

Figure S23. HMBC spectrum (600 MHz) of artematrotrimer B (**2**) in CD<sub>3</sub>OD.

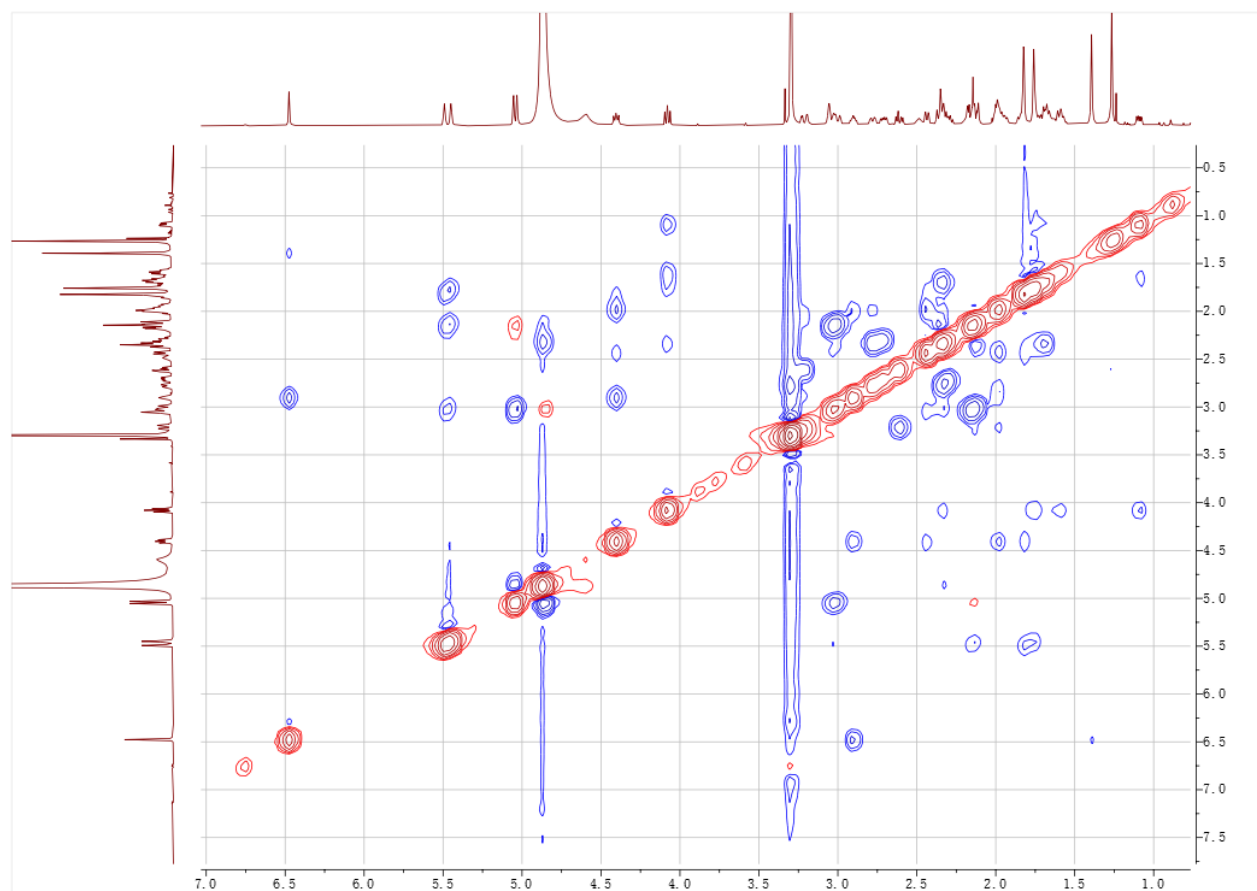

Figure S24. ROESY spectrum (600 MHz) of artematrotimer B (**2**) in CD<sub>3</sub>OD.

## 6. HRESIMS, IR, $[\alpha]_D$ , ECD and NMR spectra of compound 3

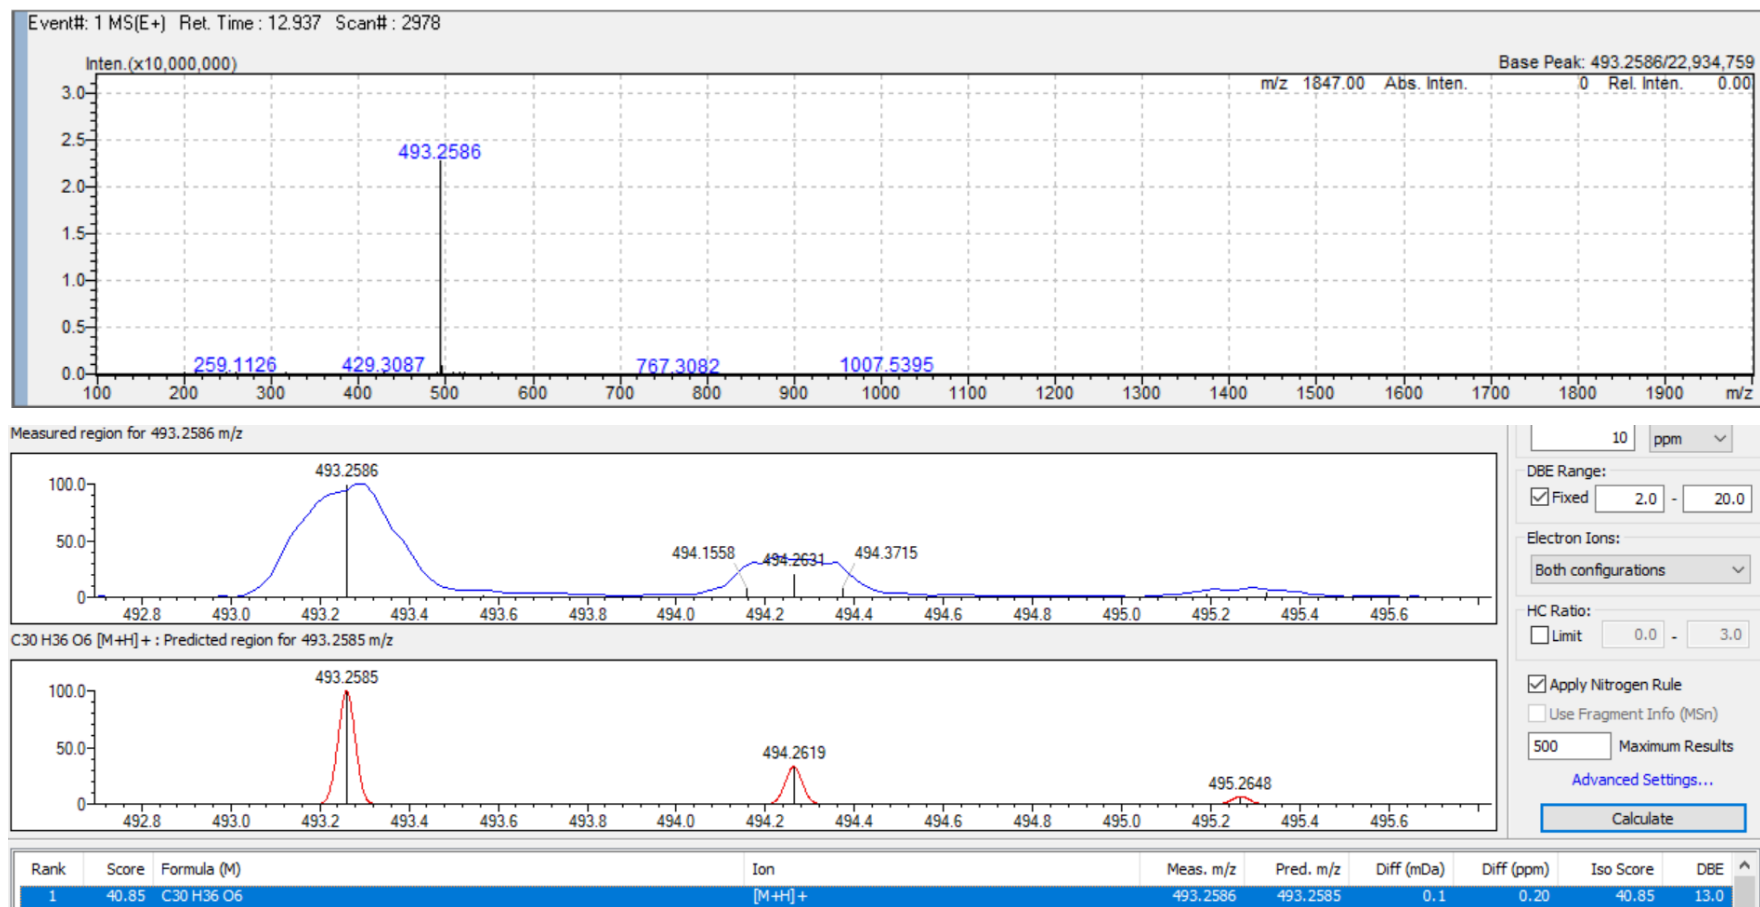

Figure S25. HRESIMS spectrum of artematrodimer A (3).



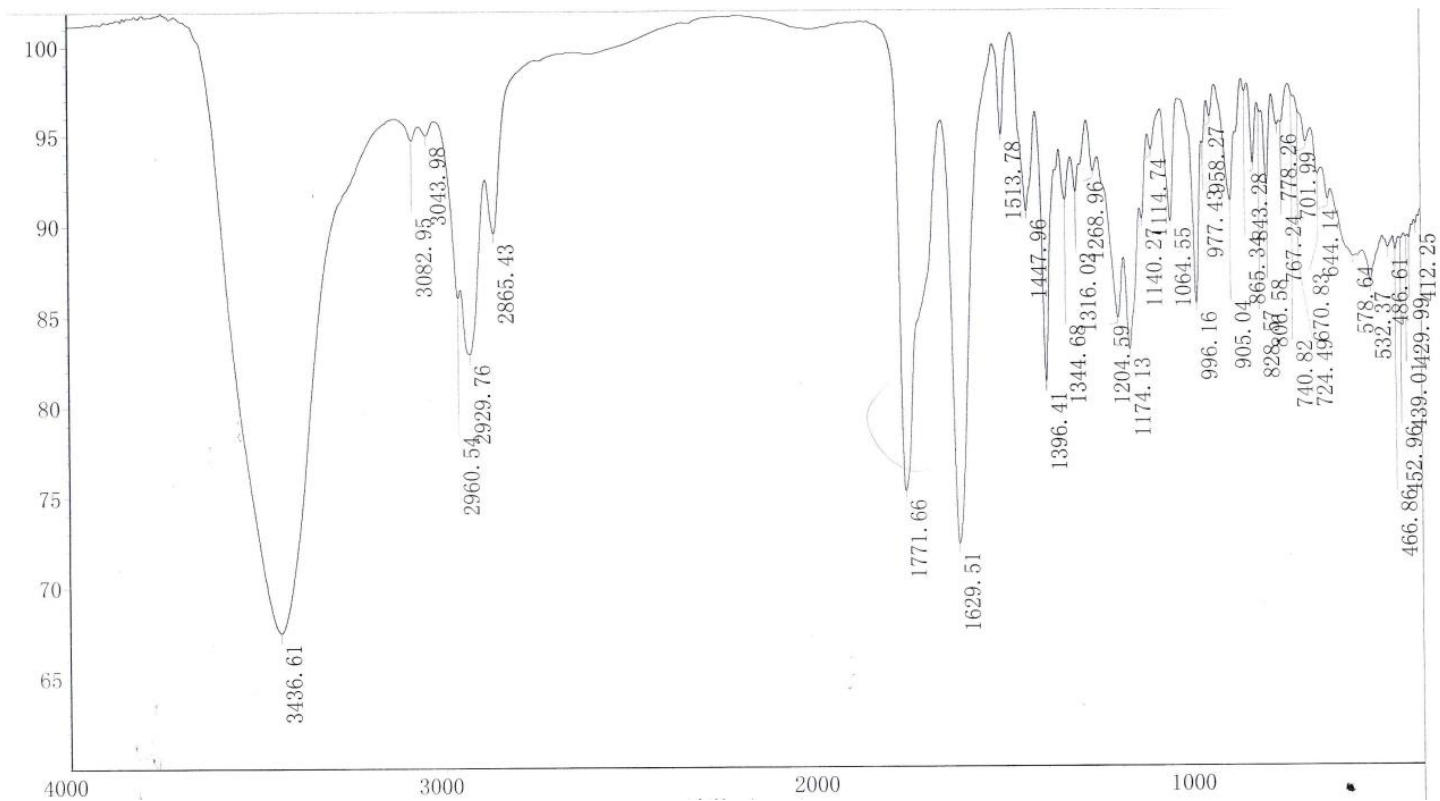

Figure S26. IR spectrum of artematrodimer A (**3**).

### **Rudolph Research Analytical**

This sample was measured on an Autopol VI, Serial #91058  
Manufactured by Rudolph Research Analytical, Hackettstown, NJ, USA.

Measurement Date : Friday, 13-DEC-2019

Set Temperature : OFF

Time Delay : Disabled

Delay between Measurement : Disabled

| <u>n</u> | <u>Average</u> | <u>Std.Dev.</u> | <u>% RSD</u> | <u>Maximum</u> | <u>Minimum</u> |
|----------|----------------|-----------------|--------------|----------------|----------------|
| 5        | -129.62        | 0.34            | -0.26        | -129.12        | -130.00        |

| <u>S.No</u> | <u>Sample ID</u> | <u>Time</u> | <u>Result</u> | <u>Scale</u> | <u>OR °Arc</u> | <u>WLG.nm</u> | <u>Lg.mm</u> | <u>Conc.g/100ml</u> | <u>Temp.</u> |
|-------------|------------------|-------------|---------------|--------------|----------------|---------------|--------------|---------------------|--------------|
| 1           | JAR109C          | 02:19:59 PM | -130.00       | SR           | -0.0884        | 589           | 100.00       | 0.068               | 21.7         |
| 2           | JAR109C          | 02:20:08 PM | -129.56       | SR           | -0.0881        | 589           | 100.00       | 0.068               | 21.7         |
| 3           | JAR109C          | 02:20:16 PM | -129.85       | SR           | -0.0883        | 589           | 100.00       | 0.068               | 21.7         |
| 4           | JAR109C          | 02:20:24 PM | -129.56       | SR           | -0.0881        | 589           | 100.00       | 0.068               | 21.7         |
| 5           | JAR109C          | 02:20:32 PM | -129.12       | SR           | -0.0878        | 589           | 100.00       | 0.068               | 21.8         |

Figure S27. Optical rotation spectrum of artematrodimer A (3).

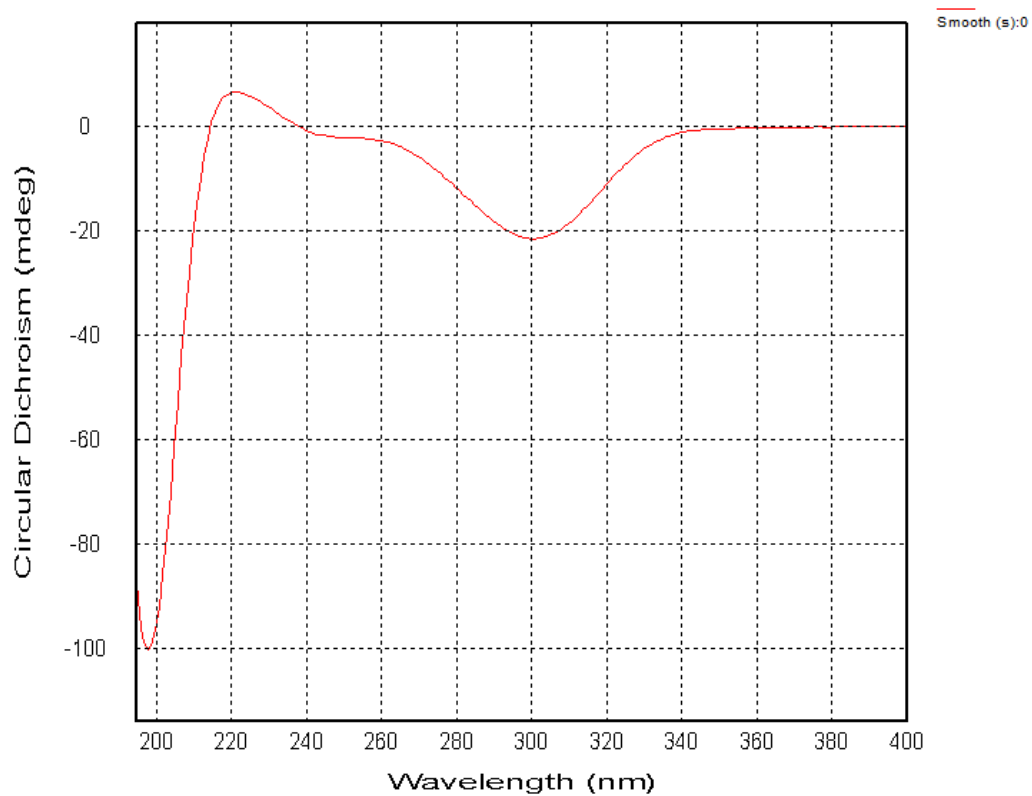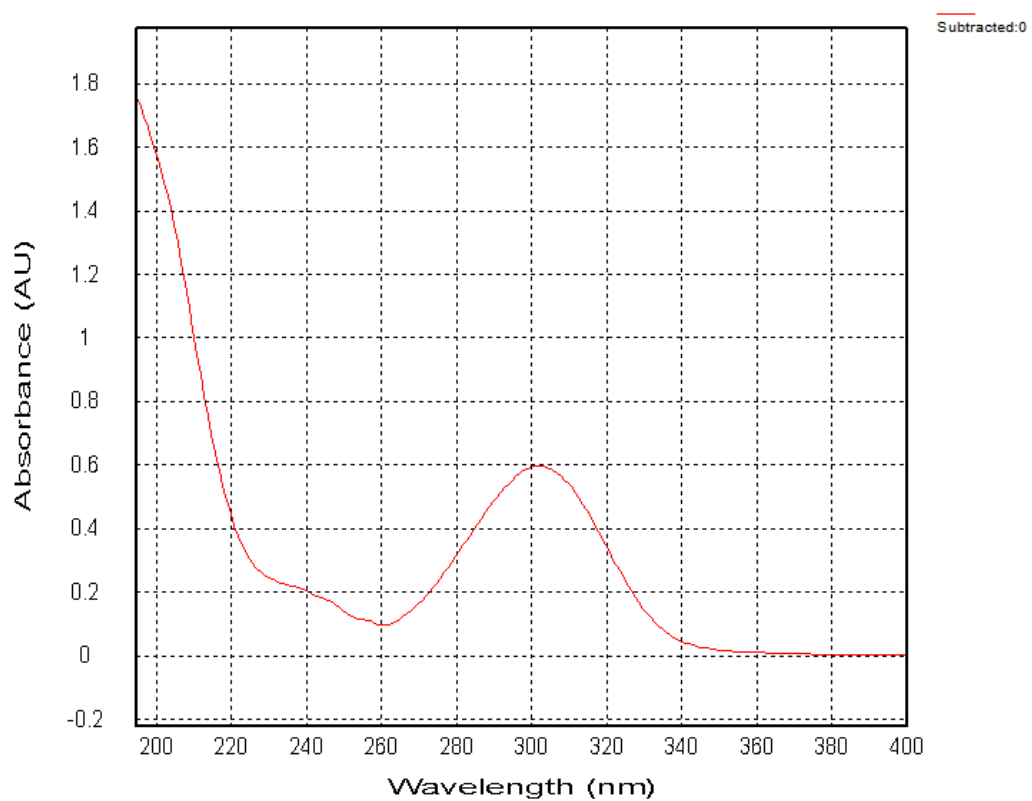

Figure S28. ECD (top) and UV (bottom) spectra of artematrodimer A (**3**).

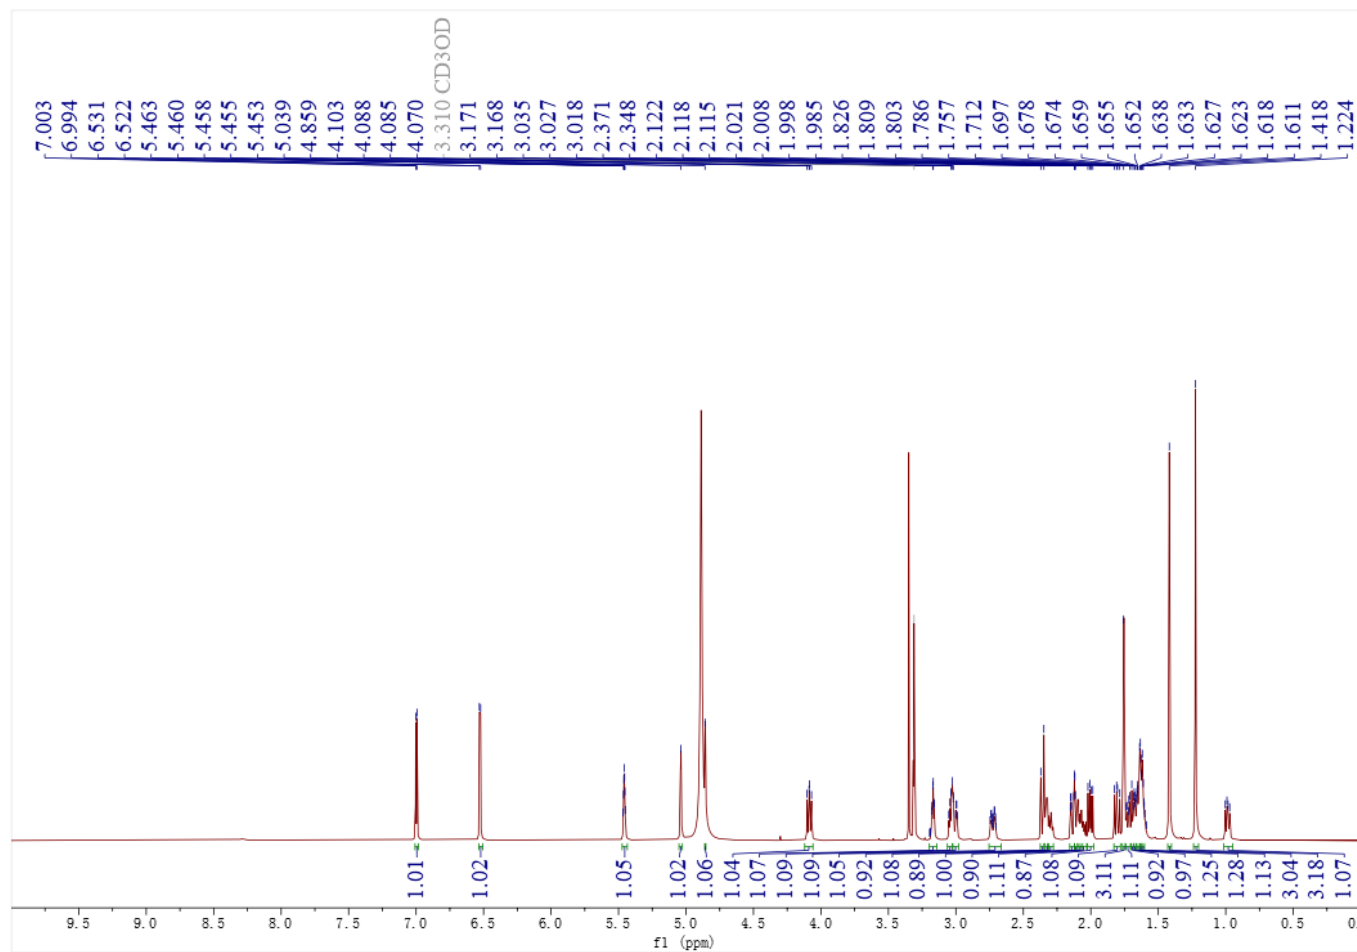

Figure S29.  $^1\text{H}$  spectrum (600 MHz) of artematrodimer A (**3**) in  $\text{CD}_3\text{OD}$ .

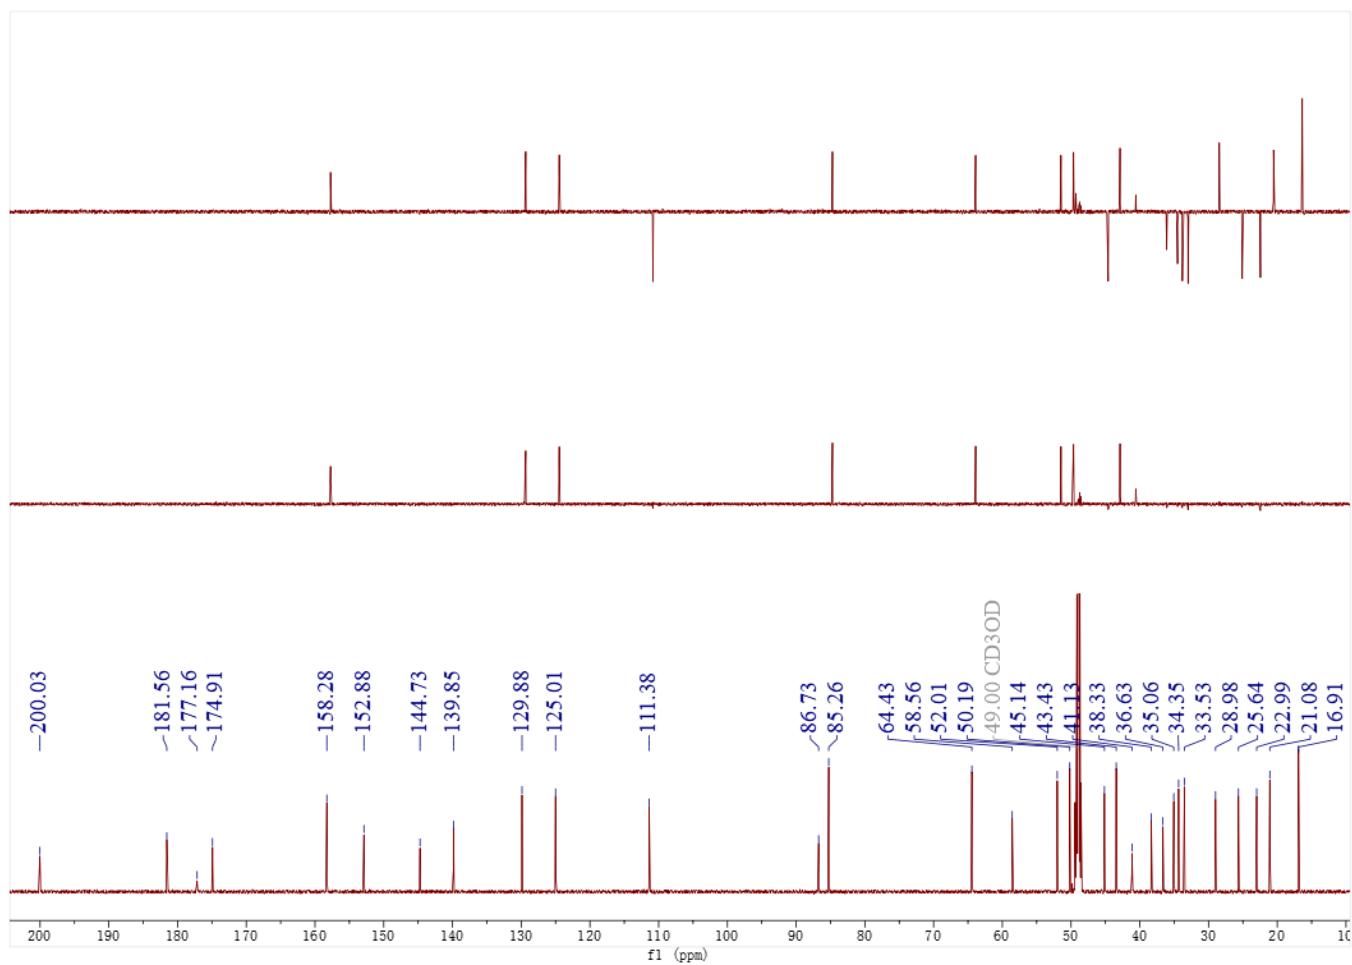

Figure S30.  $^{13}\text{C}$  and DEPT spectra (150 MHz) of artematrodimer A (**3**) in  $\text{CD}_3\text{OD}$ .

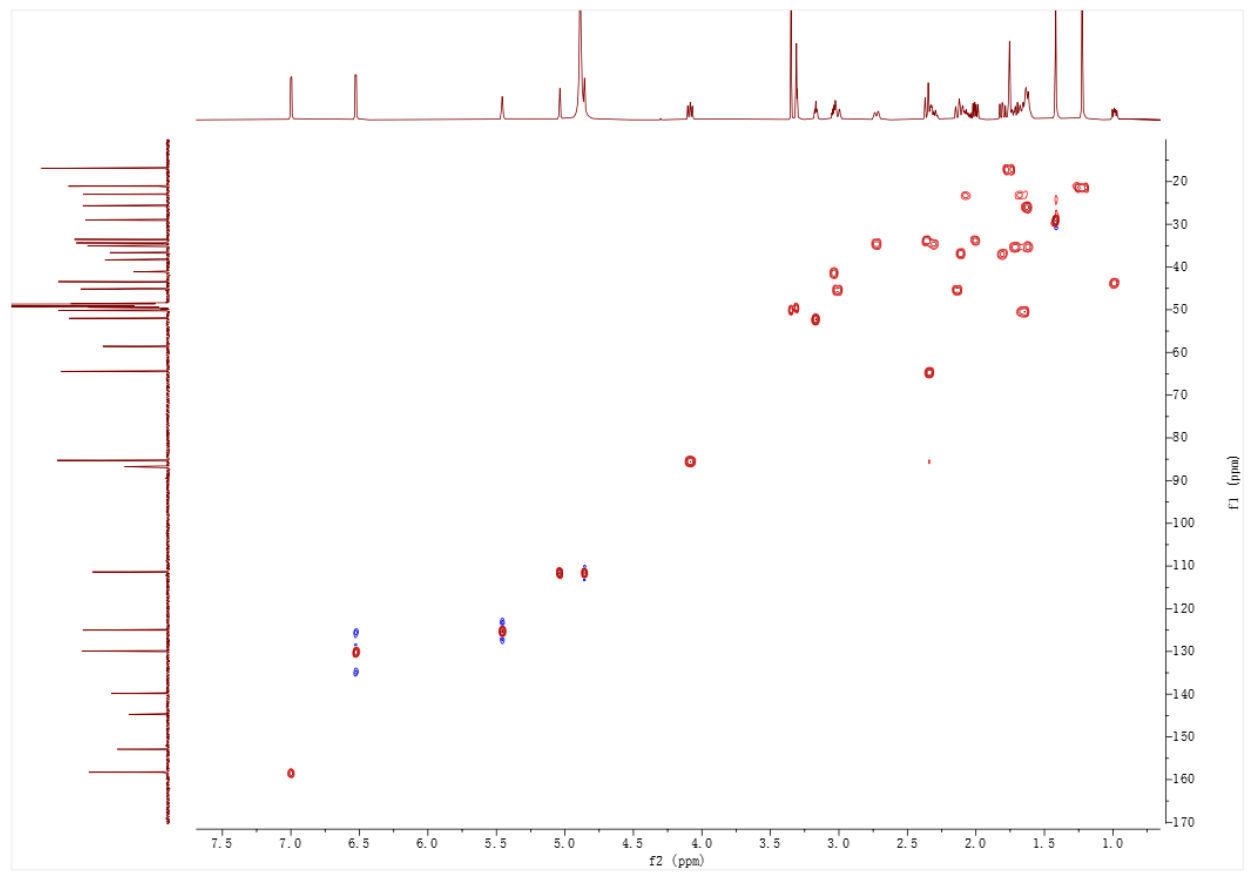

Figure S31. HSQC spectrum (600 MHz) of artematrodimer A (**3**) in CD<sub>3</sub>OD.

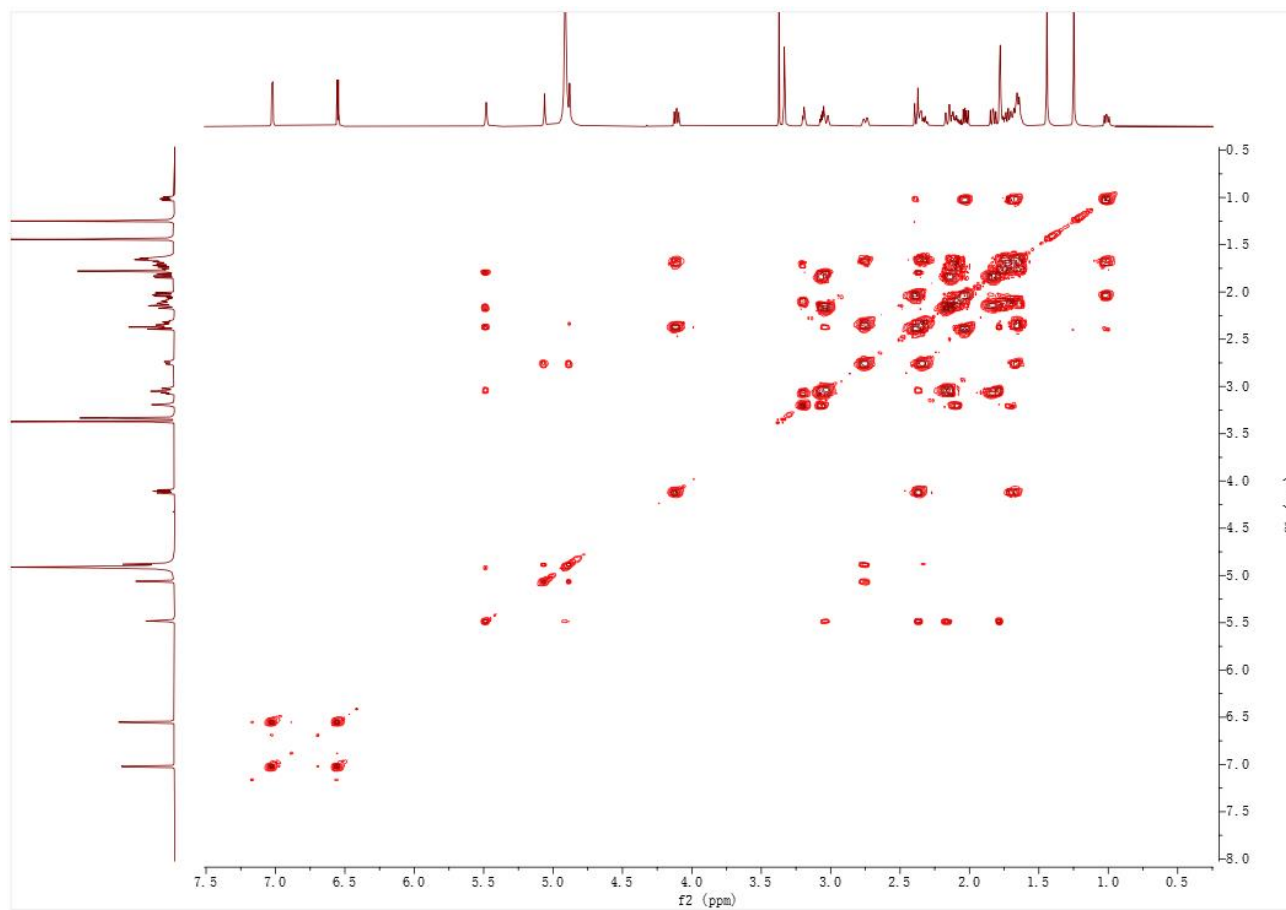

Figure S32.  $^1\text{H}$ - $^1\text{H}$  COSY spectrum (600 MHz) of artematrodimer A (**3**) in  $\text{CD}_3\text{OD}$ .

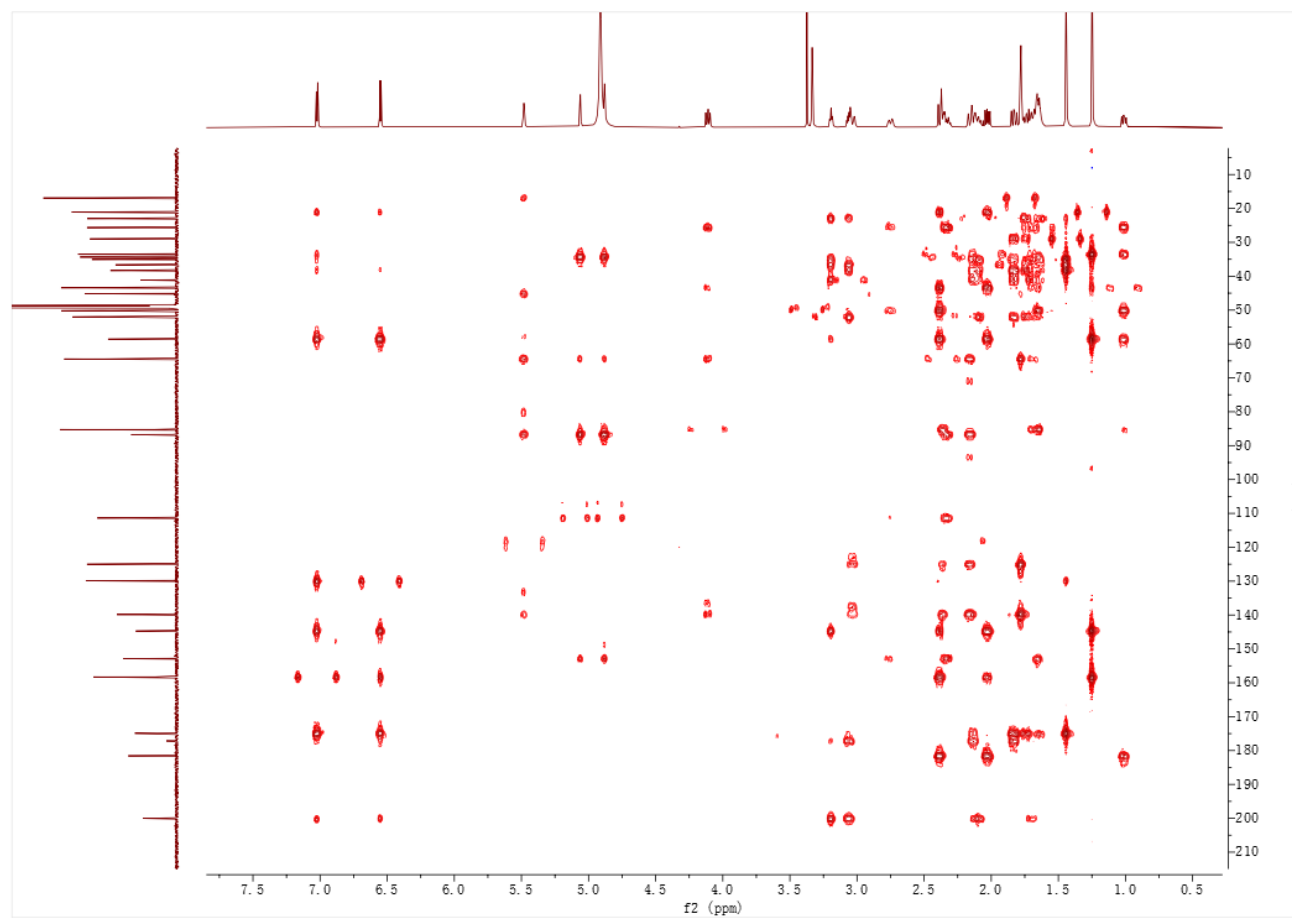

Figure S33. HMBC spectrum (600 MHz) of artematrodimer A (**3**) in CD<sub>3</sub>OD.



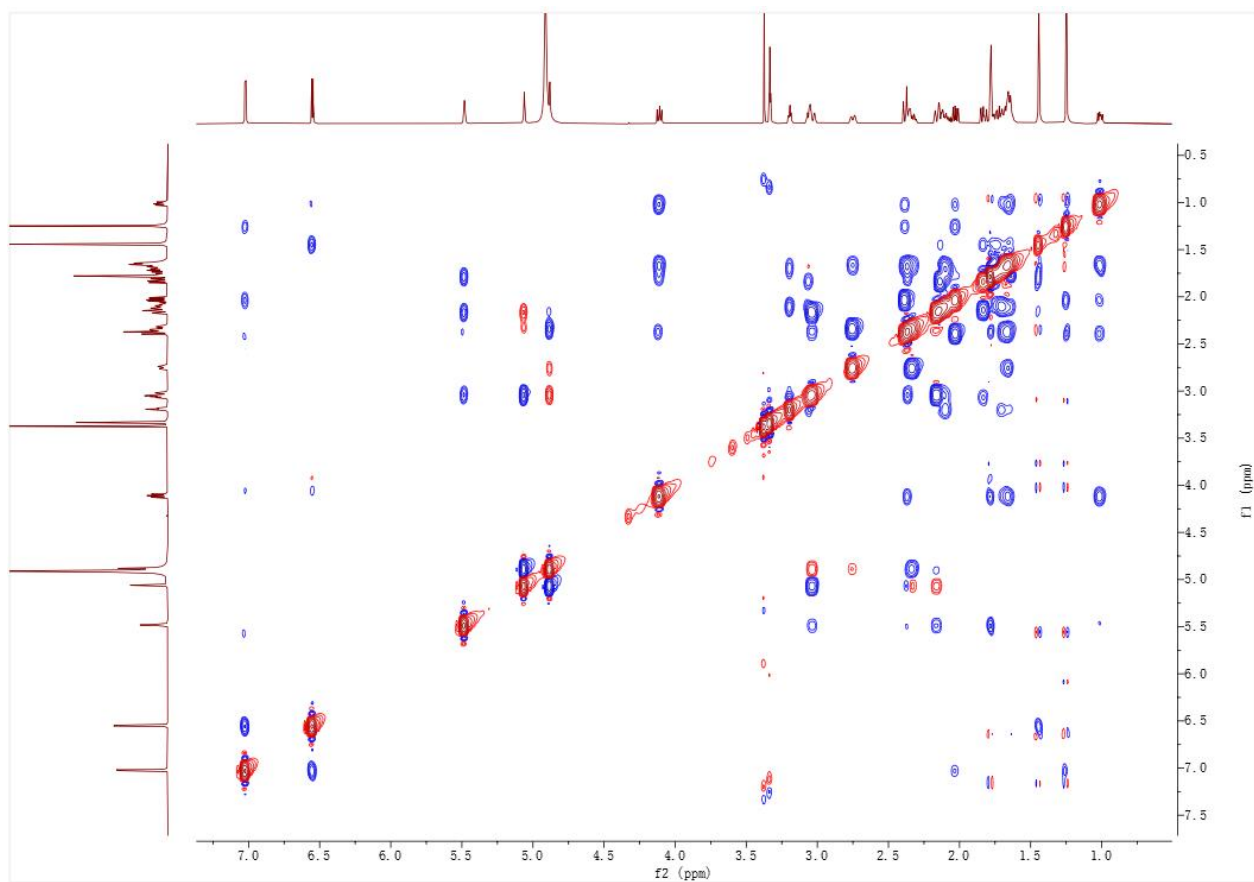

Figure S34. ROESY spectrum (600 MHz) of artematrodimer A (**3**) in CD<sub>3</sub>OD.

## 7. HRESIMS, IR, $[\alpha]_D$ , ECD and NMR spectra of compound 4

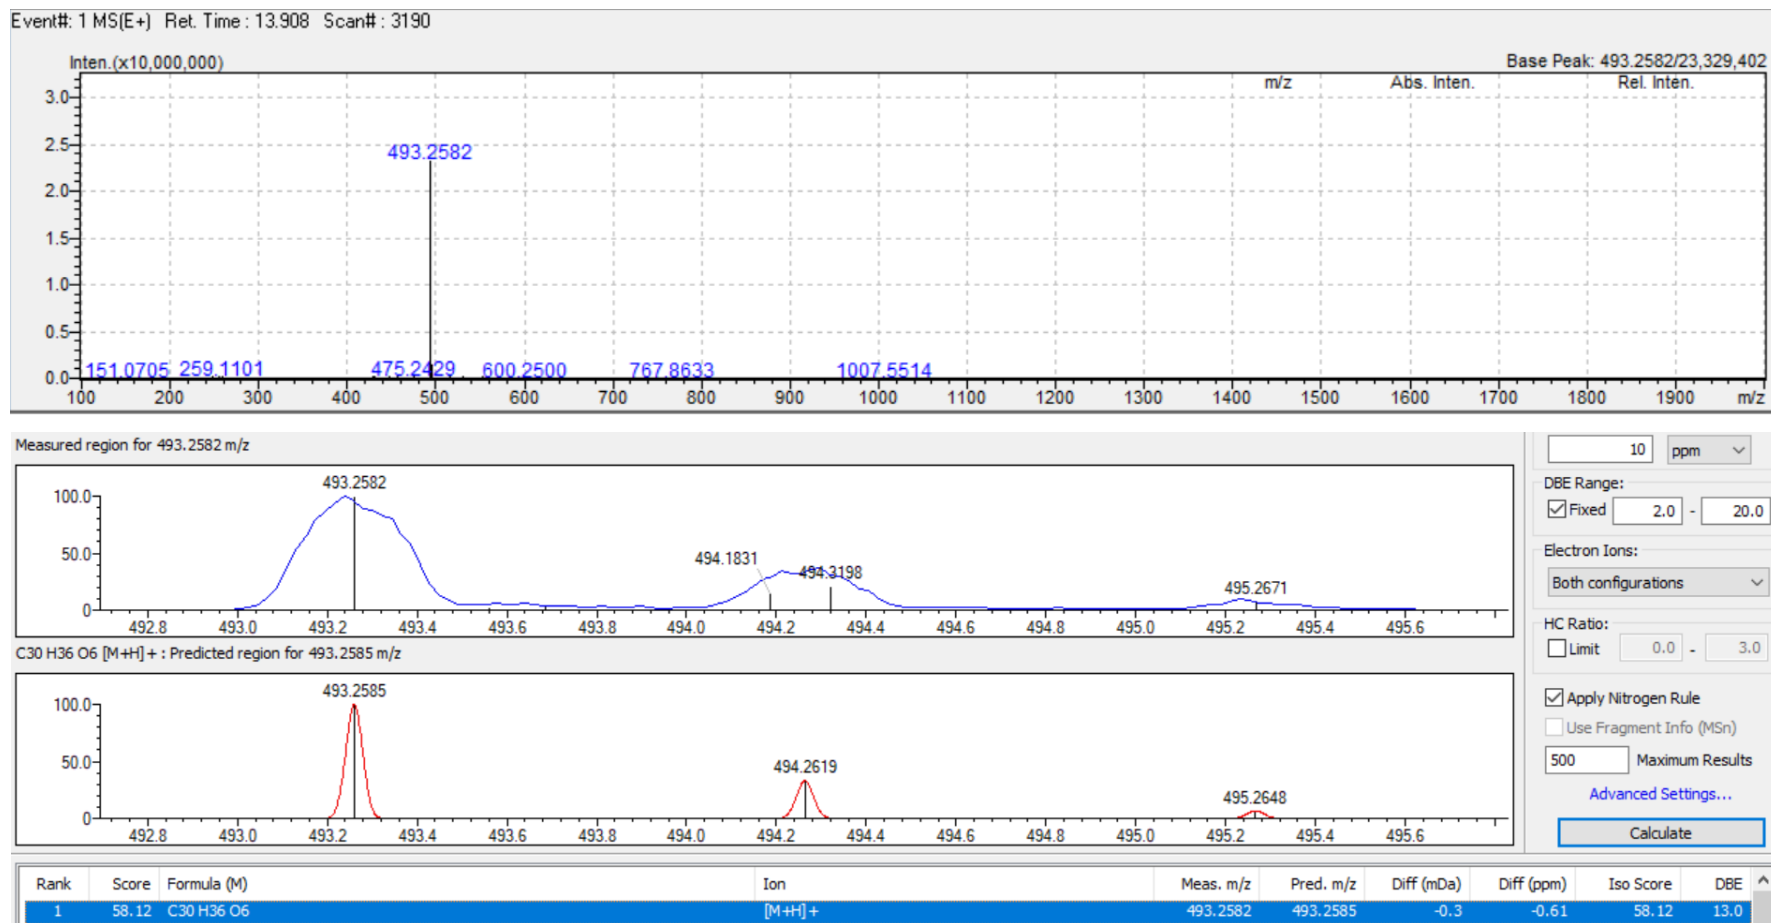

Figure S35. HRESIMS spectrum of artematrodimer B (4).

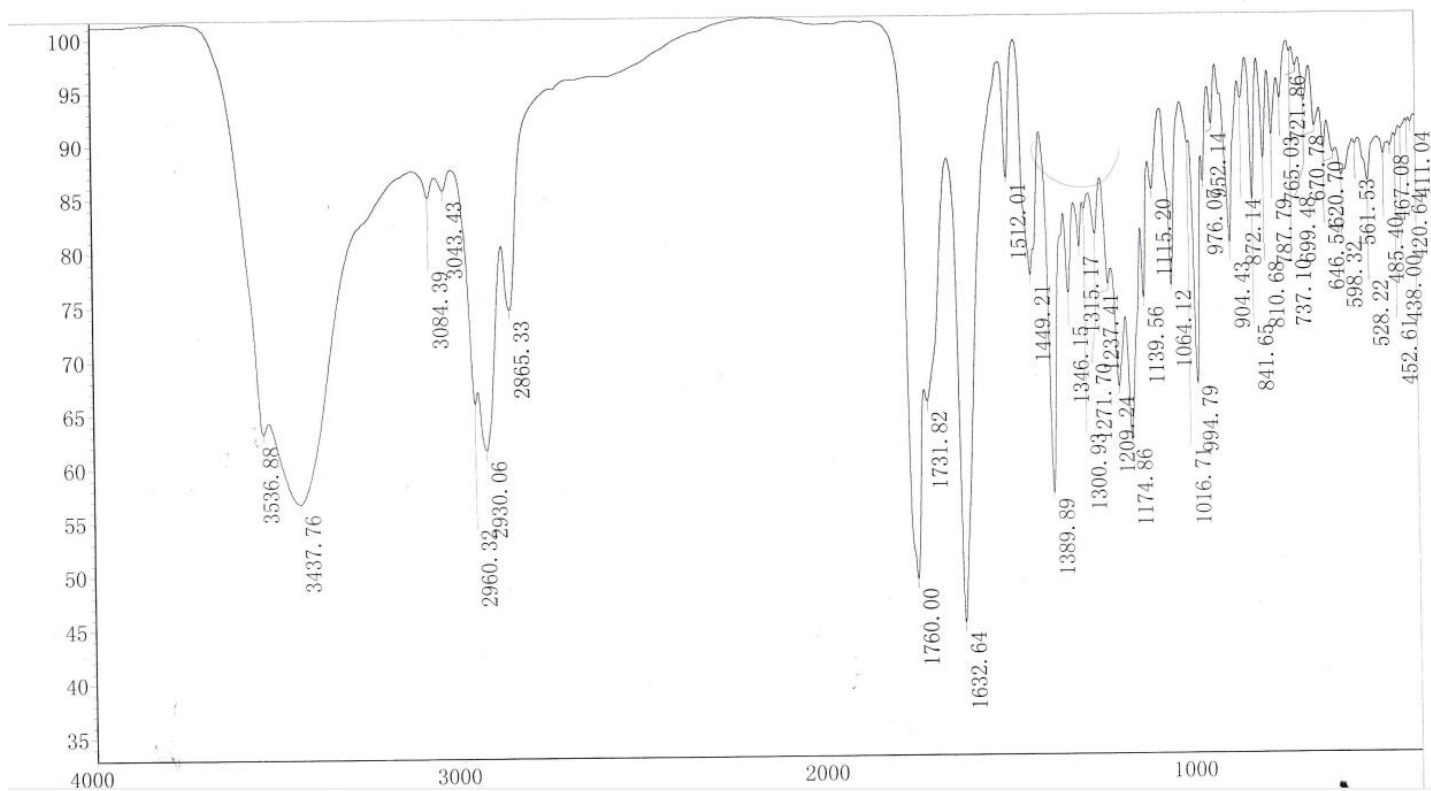

Figure S36. IR spectrum of artematrodimer B (4).

**Rudolph Research Analytical**

This sample was measured on an Autopol VI, Serial #91058  
Manufactured by Rudolph Research Analytical, Hackettstown, NJ, USA.

Measurement Date : Thursday, 14-MAY-2020

Set Temperature : OFF

Time Delay: Disabled

Delay between Measurement : Disabled

| <u>n</u>    | <u>Average</u>   | <u>Std.Dev.</u> | <u>% RSD</u>  | <u>Maximum</u> | <u>Minimum</u> |               |              |                     |              |  |
|-------------|------------------|-----------------|---------------|----------------|----------------|---------------|--------------|---------------------|--------------|--|
| 5           | -88.37           | 1.30            | -1.47         | -86.57         | -89.76         |               |              |                     |              |  |
| <u>S.No</u> | <u>Sample ID</u> | <u>Time</u>     | <u>Result</u> | <u>Scale</u>   | <u>OR °Arc</u> | <u>WLG.nm</u> | <u>Lg.mm</u> | <u>Conc.g/100ml</u> | <u>Temp.</u> |  |
| 1           | JAR109D          | 05:49:05 PM     | -86.57        | SR             | -0.1818        | 589           | 100.00       | 0.210               | 25.2         |  |
| 2           | JAR109D          | 05:49:13 PM     | -87.67        | SR             | -0.1841        | 589           | 100.00       | 0.210               | 25.2         |  |
| 3           | JAR109D          | 05:49:21 PM     | -88.43        | SR             | -0.1857        | 589           | 100.00       | 0.210               | 25.2         |  |
| 4           | JAR109D          | 05:49:29 PM     | -89.76        | SR             | -0.1885        | 589           | 100.00       | 0.210               | 25.2         |  |
| 5           | JAR109D          | 05:49:37 PM     | -89.43        | SR             | -0.1878        | 589           | 100.00       | 0.210               | 25.2         |  |

Figure S37. Optical rotation spectrum of artematrodimer B (4).

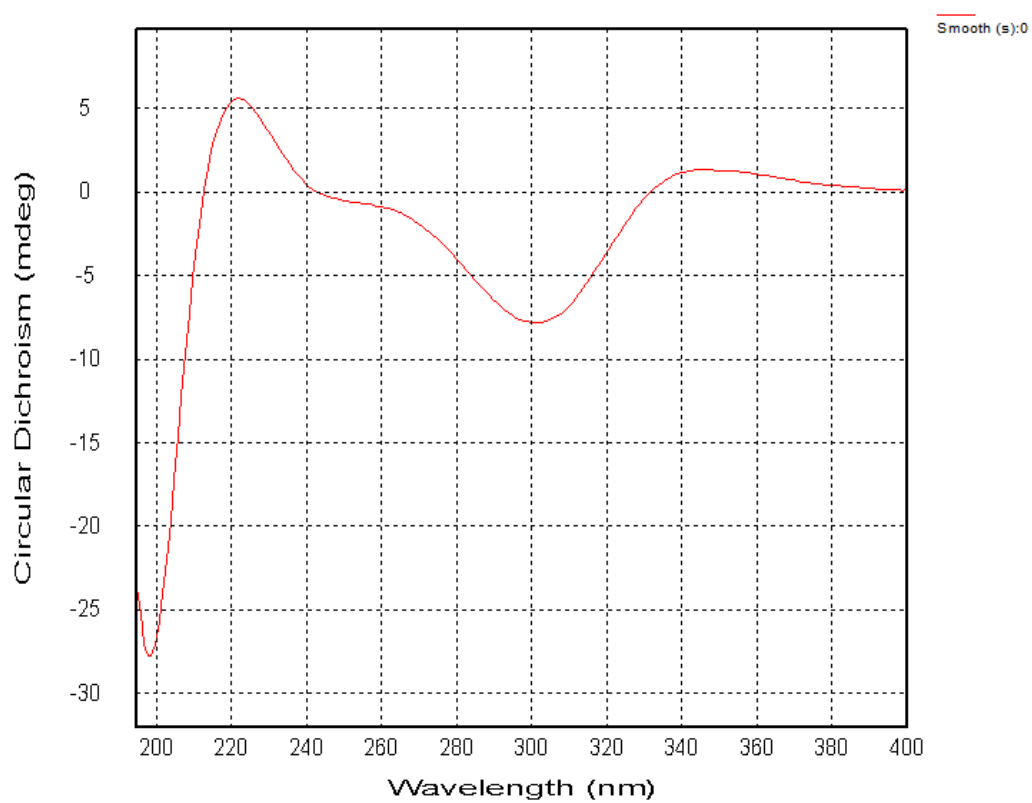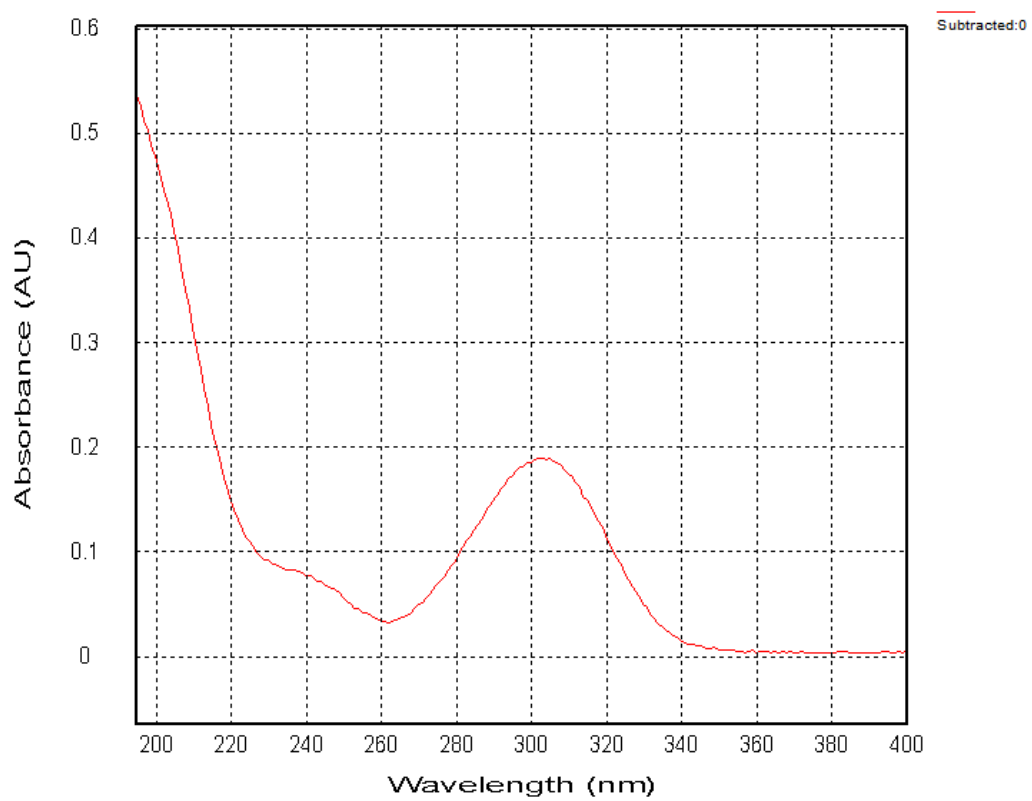

Figure S38. ECD (top) and UV (bottom) spectra of artematrodimer B (4).

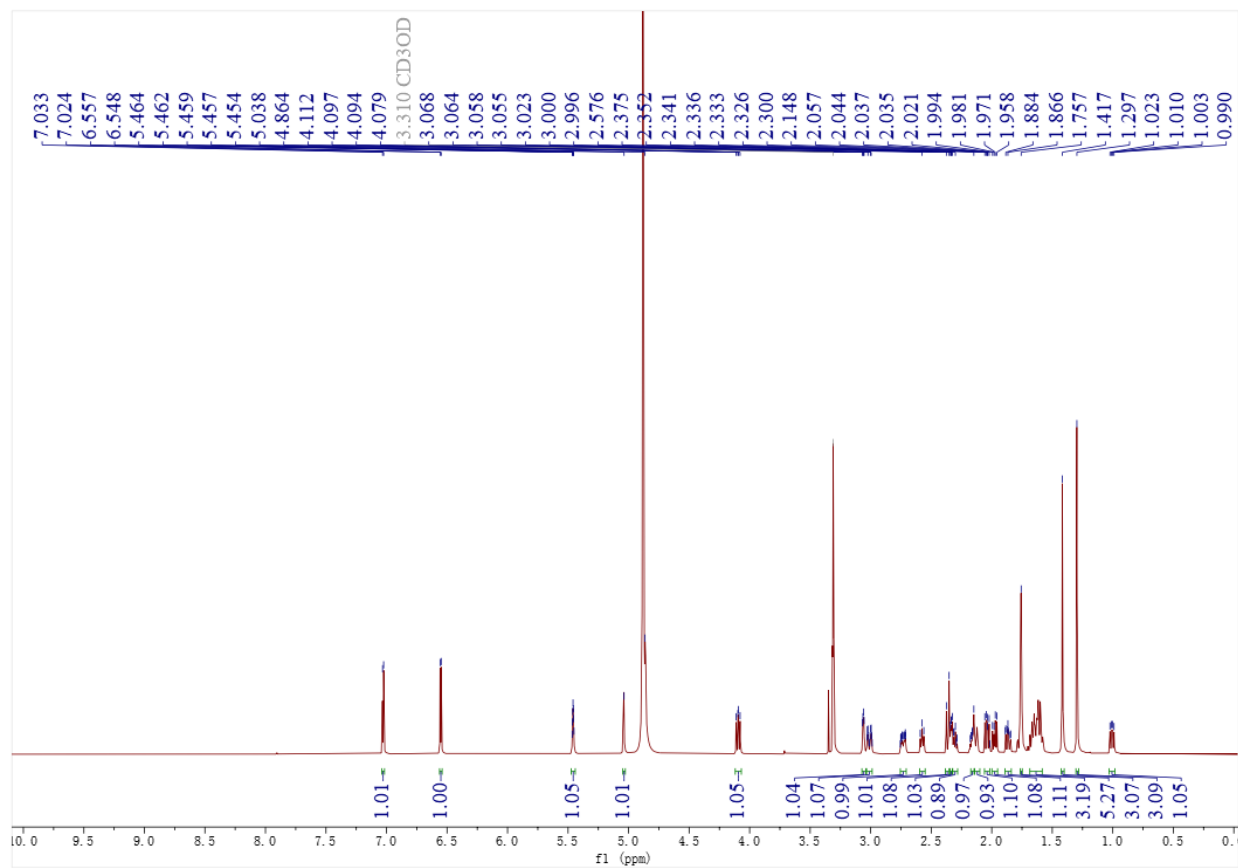

Figure S39.  $^1\text{H}$  spectrum (600 MHz) of artematrodimer B (**4**) in  $\text{CD}_3\text{OD}$ .

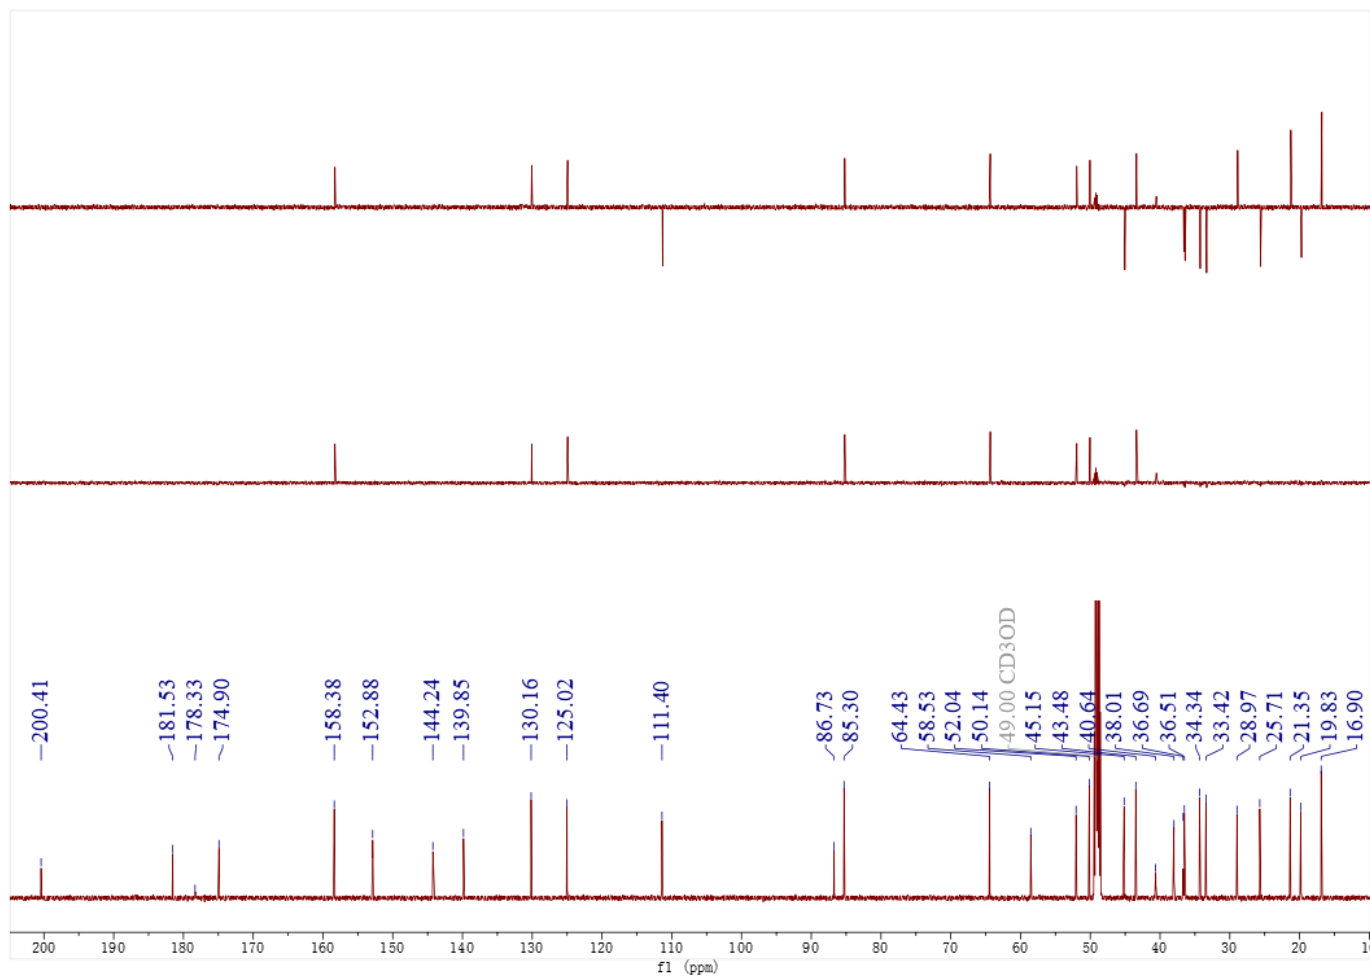

Figure S40.  $^{13}\text{C}$  and DEPT spectra (150 MHz) of artematrodimer B (**4**) in  $\text{CD}_3\text{OD}$ .

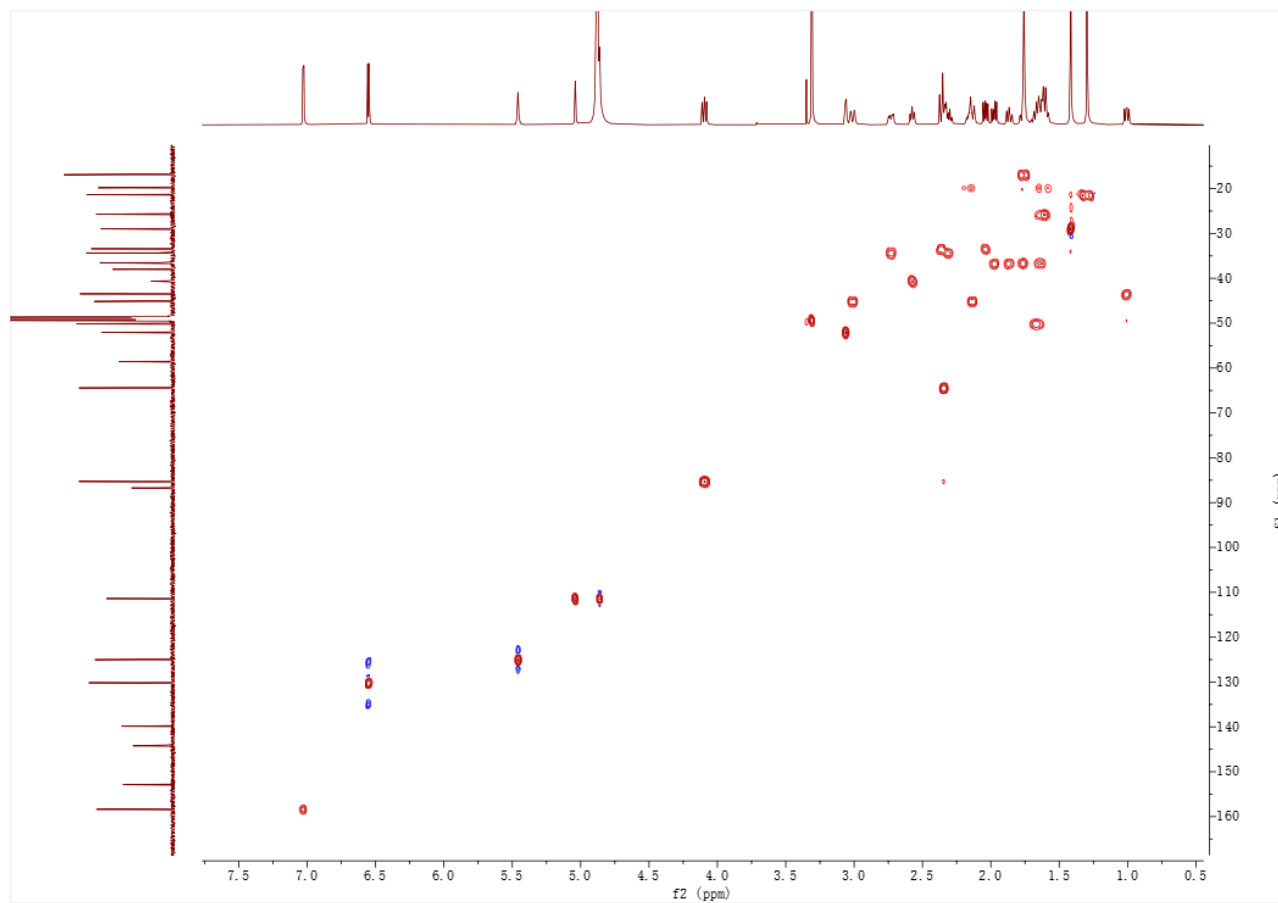

Figure S41. HSQC spectrum (600 MHz) of artematrodimer B (**4**) in CD<sub>3</sub>OD.



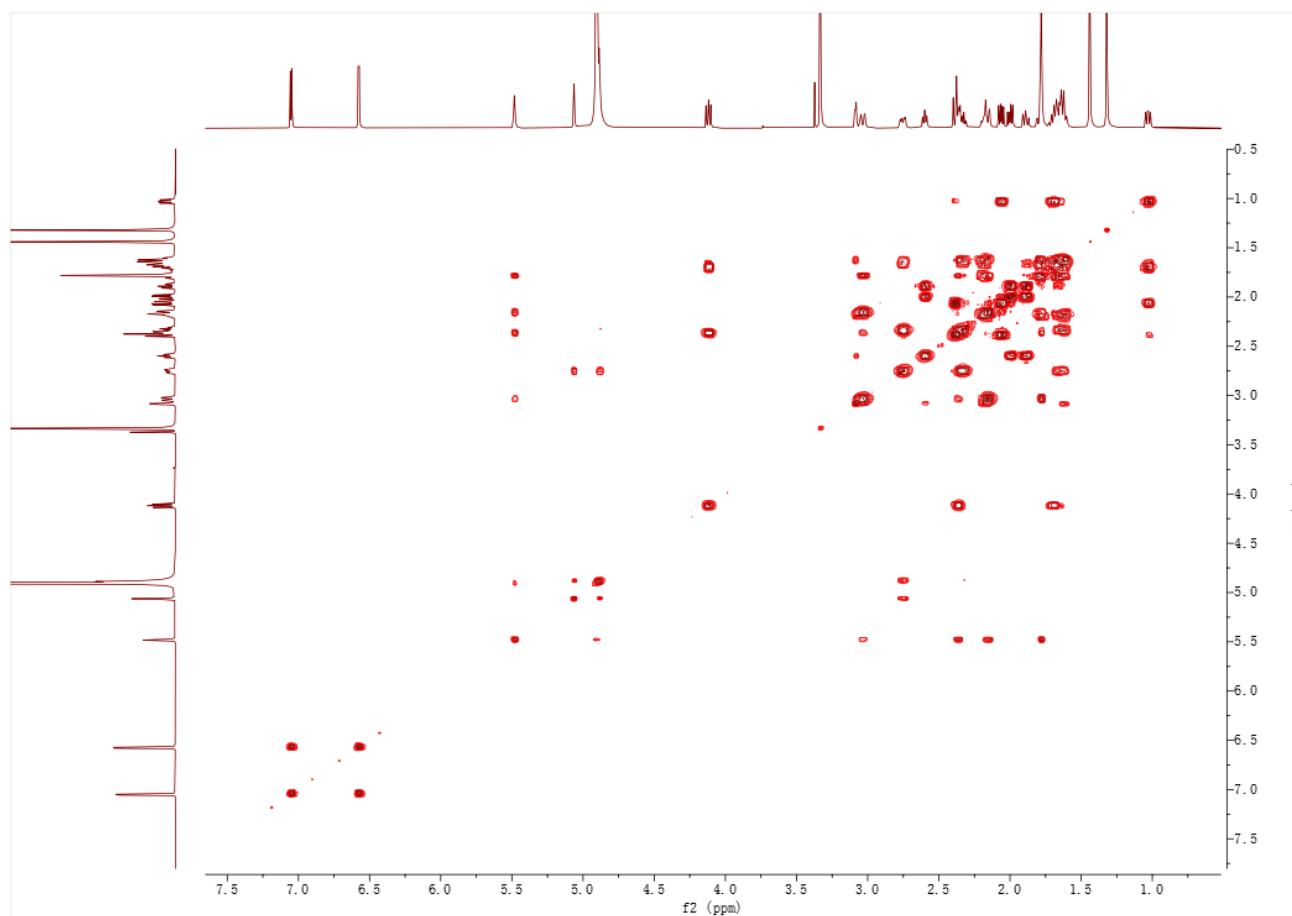

Figure S42.  $^1\text{H}$ - $^1\text{H}$  COSY spectrum (600 MHz) of artematrodimer B (**4**) in  $\text{CD}_3\text{OD}$ .

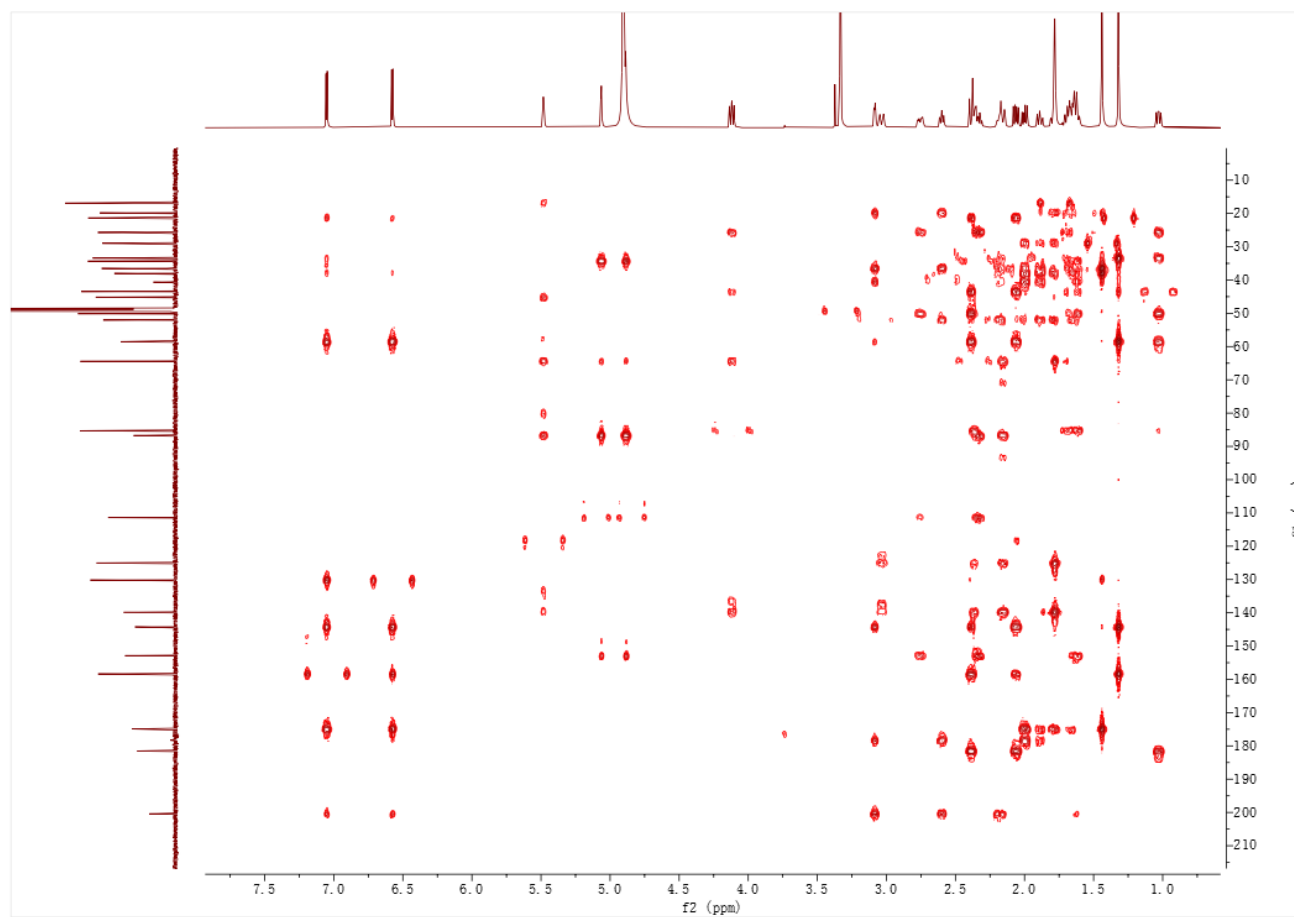

Figure S43. HMBC spectrum (600 MHz) of artematrodimer B (**4**) in CD<sub>3</sub>OD.

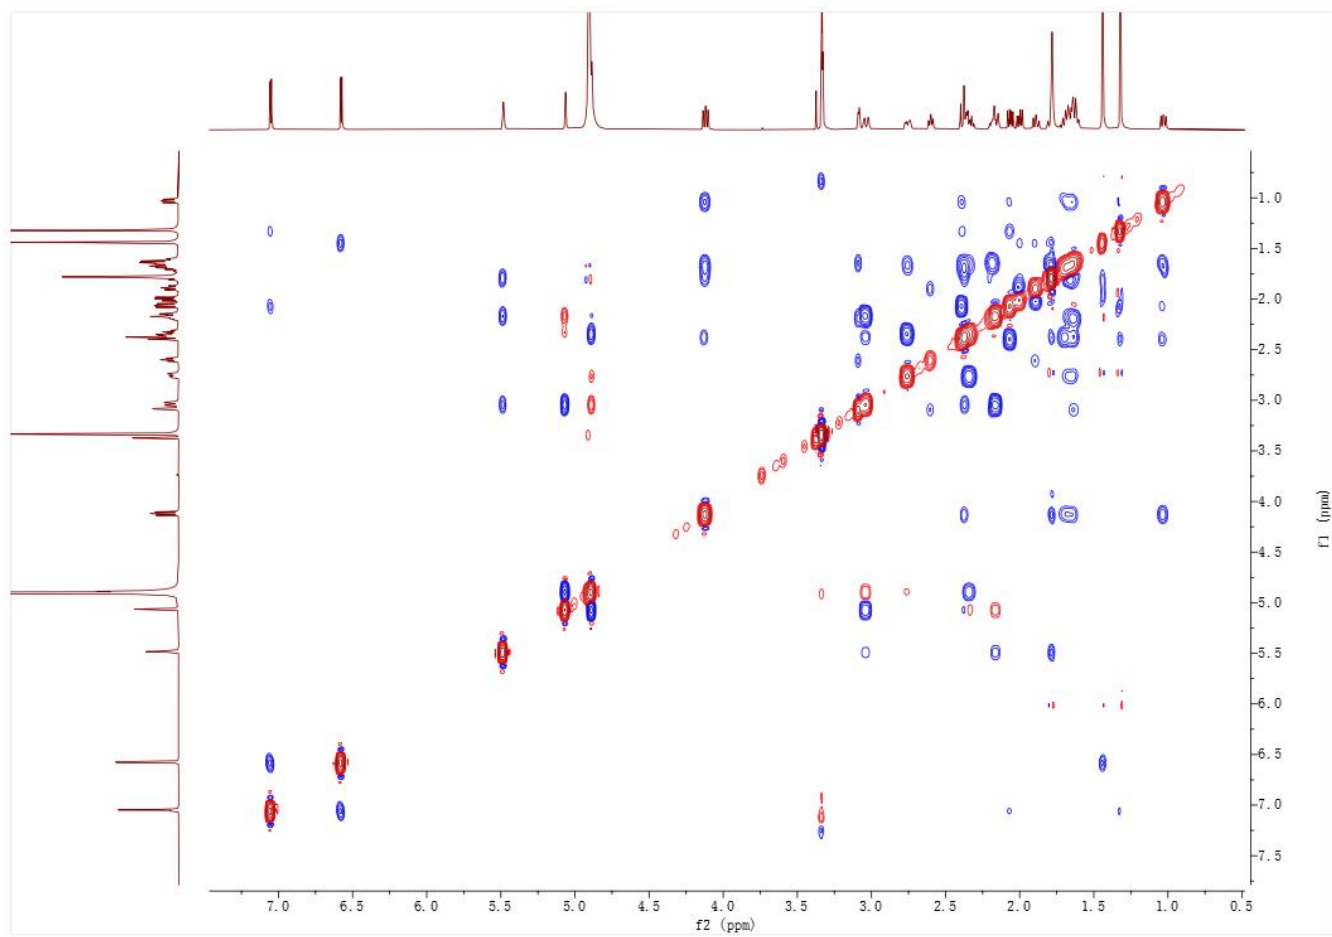

Figure S44. ROESY spectrum (600 MHz) of artematrodimer B (**4**) in CD<sub>3</sub>OD.

## 8. Chiral HPLC analyses of compounds 1 and 2

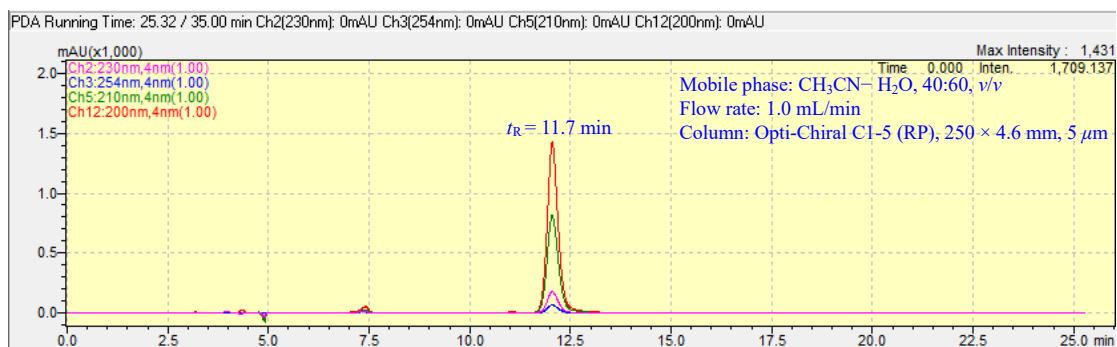

Figure S45. HPLC chart of compound 1 by using a chiral column.

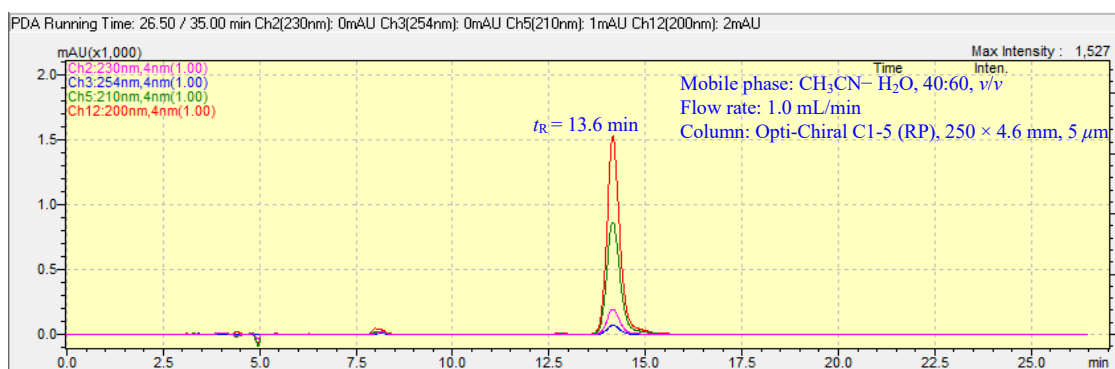

Figure S46. HPLC chart of compound 2 by using a chiral column.
